# Supplementary material for: Plant Mitochondrial Genome Evolution Can Be Explained by DNA Repair Mechanisms
Source: PubMed Central journal article supplement — Genome Biol Evol. 2013 May 3;5(6):1079–86. doi: 10.1093/gbe/evt069 (PMC3698917; doi:10.1093/gbe/evt069), 2013-05-03
Supplement: supp_evt069_Supplementary_file_1.pdf [file supp_evt069_Supplementary_file_1.pdf]

### Supplementary Table 1. Mitochondrial mutations in *A. thaliana*

| Col-0 position | Col-0 | C24 | Type of mutation |
|----------------|-------|-----|------------------|
| 32731          | T     | C   | transition       |
| 61788          | C     | T   | transition       |
| 99416          | G     | A   | transition       |
| 136702         | T     | C   | transition       |
| 216873         | A     | G   | transition       |
| 221694         | G     | A   | transition       |
| 227960         | G     | A   | transition       |
| 267167         | C     | T   | transition       |
| 306242         | A     | G   | transition       |
| 306609         | A     | G   | transition       |
| 306736         | A     | G   | transition       |
| 306815         | G     | A   | transition       |
| 318020         | G     | A   | transition       |
| 330185         | C     | T   | transition       |
| 333801         | C     | T   | transition       |
| 359929         | A     | G   | transition       |
| 361127         | G     | A   | transition       |
| 8789           | T     | G   | transversion     |
| 14681          | A     | C   | transversion     |
| 18930          | A     | C   | transversion     |
| 19275          | T     | G   | transversion     |
| 29488          | A     | T   | transversion     |
| 34234          | G     | T   | transversion     |
| 58355          | A     | C   | transversion     |
| 59712          | G     | T   | transversion     |
| 62748          | G     | T   | transversion     |
| 81609          | G     | T   | transversion     |
| 84529          | A     | C   | transversion     |
| 108847         | A     | C   | transversion     |
| 110357         | C     | A   | transversion     |
| 112905         | A     | C   | transversion     |
| 116312         | G     | T   | transversion     |
| 119374         | G     | T   | transversion     |
| 122419         | A     | C   | transversion     |
| 135125         | G     | C   | transversion     |
| 167272         | A     | C   | transversion     |
| 176844         | T     | G   | transversion     |
| 178737         | T     | G   | transversion     |
| 221625         | C     | A   | transversion     |
| 230278         | C     | A   | transversion     |

|        |           |          |              |
|--------|-----------|----------|--------------|
| 243601 | C         | A        | transversion |
| 253524 | T         | G        | transversion |
| 255633 | C         | A        | transversion |
| 264526 | G         | T        | transversion |
| 268609 | T         | G        | transversion |
| 290303 | T         | G        | transversion |
| 297203 | T         | G        | transversion |
| 298438 | G         | C        | transversion |
| 305593 | G         | T        | transversion |
| 306219 | C         | A        | transversion |
| 306268 | G         | C        | transversion |
| 306284 | A         | C        | transversion |
| 306673 | T         | A        | transversion |
| 306677 | C         | A        | transversion |
| 306679 | T         | A        | transversion |
| 306730 | A         | C        | transversion |
| 306731 | C         | G        | transversion |
| 306737 | A         | T        | transversion |
| 306764 | A         | C        | transversion |
| 311432 | G         | C        | transversion |
| 322252 | G         | T        | transversion |
| 324473 | G         | T        | transversion |
| 325614 | G         | C        | transversion |
| 332157 | T         | G        | transversion |
| 28012  | CAAAAG    | C-AAAG   | indel        |
| 32256  | A-GGT     | AGGGT    | indel        |
| 33170  | AGGGT     | A-GGT    | indel        |
| 40274  | T-CCCG    | TCCCCG   | indel        |
| 54300  | G-TTTTTA  | GTTTTTTA | indel        |
| 54725  | ACCCT     | A-CCT    | indel        |
| 73640  | TGGGGA    | T-GGGA   | indel        |
| 84063  | GCCT      | G-CT     | indel        |
| 131824 | C-AAAT    | CAAAT    | indel        |
| 133196 | G-AAG     | GAAAG    | indel        |
| 135403 | T-AAAAAAT | TAAAAAAT | indel        |
| 146160 | CTTC      | C-TC     | indel        |
| 156811 | AGGGC     | A-GGC    | indel        |
| 163337 | G-AG      | GAAG     | indel        |
| 173489 | CGGGGGA   | C-GGGGA  | indel        |
| 226311 | GCCCCG    | G-CCCG   | indel        |
| 232507 | ACCG      | A-CG     | indel        |
| 234090 | CGGGT     | C-GGT    | indel        |
| 236303 | CAAAT     | C-AAT    | indel        |

|        |          |          |                 |
|--------|----------|----------|-----------------|
| 254308 | G-AAAAAG | GAAAAAAG | indel           |
| 254607 | GTTC     | G-TC     | indel           |
| 255040 | GTTTTTC  | G-TTTC   | indel           |
| 282377 | G-AAAG   | GAAAG    | indel           |
| 282384 | G-AAAT   | GAAAAT   | indel           |
| 289160 | GTTG     | G-TG     | indel           |
| 289163 | GCCG     | G-CG     | indel           |
| 300485 | AGGT     | A-GT     | indel           |
| 311617 | C-TTTTC  | CTTTTTTC | indel           |
| 320942 | A-GGGGC  | AGGGGGC  | indel           |
| 321308 | G-CCCCCA | GCCCCCA  | indel           |
| 339886 | T-CCCCCA | TCCCCCA  | indel           |
| 340231 | A-GGA    | AGGGA    | indel           |
| 343346 | C-GGC    | CGGGC    | indel           |
| 349465 | AGGC     | A-GC     | indel           |
| 358738 | G-CCT    | GCCCT    | indel           |
| 139296 | AT       | TA       | inversion (2bp) |
| 203697 | GA       | TC       | inversion (2bp) |
| 360174 | AA       | TT       | inversion (2bp) |
| 292314 | TTTC     | GAAA     | inversion (4bp) |

**Supplementary Table 2. Complete chloroplast and mitochondrial genomes used to identify highly conserved regions in *A. thaliana*.**

A. Chloroplast genomes

| <b>Description</b>                                       | <b>Accession</b> |
|----------------------------------------------------------|------------------|
| Arabidopsis thaliana chloroplast, complete genome        | NC_000932.1      |
| Bambusa oldhamii chloroplast, complete genome            | NC_012927.1      |
| Boea hygrometrica chloroplast, complete genome           | JN107811.1       |
| Cucumis melo subsp. melo chloroplast, complete genome    | JF412791.1       |
| Cucumis sativus chloroplast complete genome              | AJ970307.1       |
| Cycas taitungensis chloroplast, complete genome          | NC_009618.1      |
| Daucus carota chloroplast, complete genome               | NC_008325.1      |
| Ferocalamus rimosivaginus plastid, complete genome       | NC_015831.1      |
| Fragaria vesca subsp. vesca chloroplast, complete genome | NC_015206.1      |
| Lotus japonicus chloroplast, complete genome             | NC_002694.1      |
| Medicago truncatula chloroplast, complete genome         | NC_003119.6      |
| Millettia pinnata chloroplast, complete genome           | NC_016708.2      |
| Nicotiana tabacum plastid, complete genome               | NC_001879.2      |
| Oryza rufipogon chloroplast, complete genome             | NC_017835.1      |
| Oryza sativa Japonica Group plastid, complete genome     | NC_001320.1      |
| Phoenix dactylifera chloroplast, complete genome         | NC_013991.2      |
| Ricinus communis chloroplast, complete genome            | NC_016736.1      |
| Silene latifolia chloroplast, complete genome            | NC_016730.1      |
| Silene vulgaris chloroplast, complete genome             | NC_016727.1      |
| Solanum lycopersicum chloroplast, complete genome        | NC_007898.2      |
| Sorghum bicolor chloroplast, complete genome             | NC_008602.1      |
| Spirodela polyrhiza chloroplast, complete genome         | NC_015891.1      |
| Triticum aestivum chloroplast, complete genome           | NC_002762.1      |
| Vigna radiata chloroplast, complete genome               | NC_013843.1      |
| Vitis vinifera chloroplast, complete genome              | NC_007957.1      |
| Zea mays chloroplast, complete genome                    | NC_001666.2      |

B. Mitochondrial genomes

| <b>Description</b>                                               | <b>Accession</b> |
|------------------------------------------------------------------|------------------|
| Bambusa oldhamii mitochondrion, complete genome                  | EU365401.1       |
| Beta macrocarpa mitochondrion, complete genome                   | FQ378026.1       |
| Beta vulgaris subsp. vulgaris mitochondrial DNA, complete genome | BA000024.1       |
| Boea hygrometrica mitochondrion, complete genome                 | JN107812.1       |
| Citrullus lanatus mitochondrion, complete genome                 | GQ856147.1       |
| Cucumis melo subsp. melo mitochondrial sequence                  | JF412792.1       |
| Cucumis sativus cultivar Calypso chromosome 1, complete sequence | HQ860792.1       |
| Cucurbita pepo mitochondrion, complete genome                    | GQ856148.1       |

|                                                                            |             |
|----------------------------------------------------------------------------|-------------|
| Cycas taitungensis mitochondrion, complete genome                          | NC_010303.1 |
| Daucus carota subsp. sativus mitochondrion, complete genome                | JQ248574.1  |
| Ferocalamus rimosivaginus fragment s168 mitochondrion, partial genome      | JQ235166.1  |
| Ferocalamus rimosivaginus mitochondrion, partial genome                    | JN120789.1  |
| Fragaria vesca subsp. americana clone fosmid 11D02, complete sequence      | EU024828.1  |
| Fragaria vesca subsp. americana isolate mt67326 mitochondrial sequence     | GU363534.1  |
| Lotus japonicus strain MG-20 mitochondrion, complete genome                | JN872551.2  |
| Malus x domestica mitochondrial complete genome, cultivar Golden delicious | FR714868.1  |
| Medicago truncatula clone mth2-5h18, complete sequence                     | AC144406.17 |
| Medicago truncatula clone mth2-7h6, complete sequence                      | AC145156.61 |
| Millettia pinnata mitochondrion, complete genome                           | JN872550.1  |
| Mimulus guttatus mitochondrion, complete genome                            | JN098455.1  |
| Nicotiana tabacum mitochondrial DNA, complete genome                       | BA000042.1  |
| Oryza rufipogon mitochondrial DNA, complete genome                         | AP011076.1  |
| Oryza sativa Japonica Group mitochondrial DNA, complete genome             | BA000029.3  |
| Phoenix dactylifera mitochondrion, complete genome                         | JN375330.1  |
| Ricinus communis mitochondrion, complete genome                            | HQ874649.1  |
| Silene latifolia mitochondrion, complete genome                            | HM562727.1  |
| Silene vulgaris chromosome 1 mitochondrion, complete sequence              | JF750427.1  |
| Silene vulgaris chromosome 3 mitochondrion, complete sequence              | JF750430.1  |
| Sorghum bicolor mitochondrion, complete genome                             | DQ984518.1  |
| Spirodela polyrhiza strain 7498 mitochondrion, complete genome             | JQ804980.1  |
| Tripsacum dactyloides cultivar Pete mitochondrion, complete genome         | DQ984517.1  |
| Triticum aestivum mitochondrion, complete genome                           | GU985444.1  |
| Vigna radiata mitochondrion, complete genome                               | HM367685.1  |
| Vitis vinifera complete mitochondrial genome, cultivar Pinot noir          | FM179380.1  |
| Zea luxurians mitochondrion, complete genome                               | DQ645537.1  |
| Zea mays strain NB mitochondrion, complete genome                          | AY506529.1  |
| Zea perennis mitochondrion, complete genome                                | DQ645538.1  |

## Supplementary Figure 1. Sequence constructed by deletion of highly conserved regions of the Col-0 mitochondrial genome.

>JF729201\_without\genes\and\conserved\blocks

```
agaggtcagaggttaacttgttatataggttagccatgcgtgttaatagatccttctcgcctgtaggtgagag
tatctttcccgcatatacaaatattccttaccaggtgtccagcgagaatgttttgactacgtaagcgaag
cagacgaatccgccttagcctattactattactcaaaaatgtggtcgagaccctcccttatttacatat
aaaagaattgcacgaagtcgatcgagaagatagatggaaagcagctctctagcaacagtacggagggaa
caactgacctcgaactgacctaacactgaagacctaaccttgaagctgtctgggtctttggtagtccaac
tactaaatctatagagatgccttcccagatctcttccggtacgggtatggatacactcctcttgccactt
tttcttctcgtacaaaagacgaaacgcaccctaagagctctatcttgcattagggagtctgggtctctcta
caccaccctactgttttgtttgttcataggggtctccaacctgcggaaagccacacaatcgcaacagg
cacgatgttctcacaaccgcggagtagagttatatggatttcattatattatgactgacattccttgcttgt
tggacaggaactctttgattcaagatccccttctactactggccagtaagataagggactatctagtttg
atcatttacgaattgcgtagataatcctcaagtgatagaaagggttagaagacagagaattcgtggttgag
ctcccaggcaagcaagctattgatgatggcttctgtgctactcgagtaacttgtgctgaggtggctgtga
ctcaaaagggttatgtattatcttccaaaagaaatgaaatttacgtgatgcgggaacctactttcccta
gatccggattgttaatatcgaaacggagaattcgttaccttccggtattgcttactttgctagctaggta
tttctatatttgagactccttactgaagtaaggaaaaggcacttccaaagagctgacacaaaaaggatt
tcaagtccttggctttgctctaaggatttcaagtcctttgctctaactaaggatgaggaacttgtgccag
agctagaagtgagtcggattcgaaccgcagacagaaggattttcagtcctcgcctctaccagagctact
acctgtcctcacttgatgatctaaaatgtgagatcgatgcaataactcgactgtaagggtccaccaggtcc
gtaggagagtcagtccttctctaagcaagctgttttctggcctatacggaaagagtttcaagaggaac
ccagctcttctcccctctcagcgggagaaggaggaaccaagcttctcccctaaaggagaaggagggaaccc
ctttccttccgctcagtcctcaattttctgttagttctctctcttaacagagcgggaattctccaggttca
gtctctttcgttactgacgaacgggagcactcgcagcttctaataactaaatataatccctattcaccaca
taggaaccggcgggagcttgactaaggactttattattgactggactctcctatactcggaattgcaggt
ggagtttcaattctctcgtgtagagctattaccaatataatcgatccttctgatgttcacagtttgacttg
tggtagactcttctcctaaagagttcaactgcttcttcccttccgaaagtgggtttacatggggctggta
ggctctcgggttgtagaccccgagggaaccctggctctaaaatagcaagactcgggttttgttccggttgatt
tctagttgggaaagcataagtagctgcaacacataagattctatcttaccagtgcccggggcgagtagtt
cccgttgcaacaaagtaagtcgtttttgccacttctaaggtttattctagactcgatctcttctctgtagc
tcatgaactctcattcagaaagatttatatcatacagcagtgagcctttttgatcccaatacatatagc
acgaccgggttgggtcttcttctttgtaaatcgtgtcaataaataaggggtgaagaatctcctgttgctgat
atcagatatcacatggaggaagacagctgtggcgccacctgcgctgggtccgctctgactactgttccc
taacttacattccattctcaggatttgccttcccttcaaaaactatcataaaaactgtacaagcataaata
gtgaaagatctccttcggaccctcacctcaatagttatcttactagcccacggaactcatcatatcagag
taagtaagtaagttacctcaaaagagagtaatgcttataggaggtctatctcccttctgtcatgcccttc
cctttttgcttttttagtaagagctgcctcctccttgcgtcctcgcgctaaagcaattgtagcagctacag
taggagaagaatgocgacggcttctgttggttatccagtagttgaactttcgggaatagaataggctcaat
gactttgcctgcttcttcttgccttgcccgtatttctcattatatagaaaagccttgaaagaacccttctgg
accaaagatgggcatcccaatcacttttgtcacaaccaactcttggcaaattgtgttcataatataattca
ataatgggtctcgagctcatctgtaaatcatggcatgggtagagaagaatggctagctatccttgagtgac
acatcgcaatgattgtatcgaagacgggagggaaccccttactttactatattatattatgtcaccatcca
atcttgggttatattatgtcaattctgcctcatcgtgaatgaaacggttttcttttgagtacccattctgga
cgacgagaggaatggtgaaatatactttttaatgggtaaaataaatctctgcttctgttccaattaccgt
cctgctaccaaccaaagccacttgtacttcttcccgcgaaaactcggaaatagcttttagctcgaacct
tgatctgttgctcgaactctaatacacctgtagtagcaggcggcactcgagttcttctgtgccaggtgtcag
aaaaaagtagcgaatttccaagcatcctagttcagcgtgaatcatctcttgtctcaatggaaggccaag
gccttcaaagcggattccgcccgaagctaataccagtggttggtagtgaggagaccgaacatgaattata
ccataaaagggtccttctaccctattccaaaacccttcccctctgagggcacgggacactttcagg
aagtaatgtagtaaacagtcgaatttcaaatagaactatgggtgaccttgcaaaaaagatcttttcttctgt
ttgagtgtacctttcctatgactattaatccttatgaaatccgtgaagttttgaccttggttttagaagct
ttctttggcgttgagtgaatatgggtatcactacccttcttattcttcttttattcataggaataga
```

aagcacgattaagctgtgttattcctgtgaaagtctcgTTTTGactcagTTTTTTTTgagcattgtcct  
agtagtattataaggatgttggTTTTcgtatataagaagactgctgctTTTTaggagagtgatctgttcac  
taactcaaaatattgtaagaagaagaagaatcttacgccccaaattcccacctctttaacgaccaccgaga  
agggcggatctgactaataaaagccattgccatttcacgatctTTTTccaccaggaattcccagcaaacc  
ctctactcctctTTGactaaaacttccttcatcccttgagtacgacgggatagctattcaaagcaaaga  
gttttattttctTTatgccatactcggTTTTcagtaactgatgtcagtgtatggatggaggaagaagg  
ttattccagattggagataataaattgactagtcttTgtcttcgCGctacagaagctcaggcattcttTc  
ttagaacagaaggtcaaactcatgacgaagtctgaaaccctactcttTgttgactatagaagcagtgtc  
tggaagtaaggctcgaggggagactcatcttcgggagaattcaatatccaatctatgaaactacagagcgcta  
aacagacaagcaactccctcatctaattgtcttagttgccttagtagagttaggaactcggagcctatcaca  
gaagagctccccggggtcctctcaagcgcggagggctcgataccctatatgtgcttacCGaaggagatga  
gctttattctcatacaaacgtgcaacaatcaagaagaaagaagaatacgaattctaactatctacttacc  
ggttcccgtatagatccacctTgcttcaaaataaagagtcaaaaactattattTgacttaccgactctac  
cgctgctgctactgctcggaaagagaaggacaaaggacagaagaaagagacagaggagtacCGaagtaa  
agagggagaagagagtattcGaggctactcgactcgatggggaagggtgaaagcttccctgaaagggga  
agggtTgctTgtggcgagcggaaaccatctTTTTgtgaaatgcagatgcagtggctcgatTgcctagaaaa  
aagcctTTTTcgagttaccatTTTTgaagcccttccctcggctcgggggtaccacgcaatccgTTtaga  
tatatttaagttgCGctgcaccgtgctgacccattcctattcaatctagaaatcgataaatcGtaaga  
gaagaaaatcagatctcaatctaatcgaagaagagcctcattacggaattggcatcgagaagctagggcc  
caagtagtgctcGcaatctaggtcaggtacattgcgtacgatccCGctaggccggtaaaccaatagtgt  
aagatccattccaagcttgaggtTgttTctgacaaagggaaaacactttaggagagaaaatcttcgatata  
gtaaagtatTTtagacgcttagcatgggaagataccgctcagtgatccatggatctccgatcatccaacg  
tagagagaaacatctTcgggcaattgtTgtgaacaaaggaaatgaatcttacactatagtatTcccggta  
aaacgattaattagaaagaatgtatgaacagtgagagcttctcaaagaggtcccgcagagatctagcta  
ttgtTTTTcgatatgtatgaaatctTgactttagtccgggggcatccgatcactgaattgaaccctcggac  
gtatTTTTTgacgtccttaccaaaacttccgggagtgagaaatTTTTtctccttccctTgcctcccagt  
cctTTTTTgagccagttggagagccataaaatggaagtgcttctgtcttacaggcattaccctcgtgc  
tcttctgatgcccggctagtTacaattgaaggtggagtagctTgcctttaccttagcttttcgatgcc  
atcttcgtgagtatgatcatctaaaggaaccccgctaggattTgaagacaggacctctccgtcatcata  
ctgaccgctctaccatcgatggtcaggcattgggtTgggtaaagtttaagatctaagagcatgtcgtTg  
tctTggaaaagaagagggattatagctcctTgtcatctacaataataggactccgacaggccagcca  
gaaataaactatagaaggaggtTgcttcgctagaccagcagccaaaccaacaatgaatataataat  
gatggTgattcggctcaataaaggaatgtagaaaagaaagggcggaaatagggctctatagtagctgactat  
acgagagaataggatctcaacagggtctagctagggttagagacattcatcgctcataccgaggataccat  
agatggctagtgacaaggcttagcattTggatagacgtaggcctgttcgatatttcttcatcccgatag  
atccatctgtTggaacatccgtgatccatcataaatccctccgaaaagaagtatcctTTtatgtgctTga  
cttatcaaccgaaagtgtgtggaggaaggaaaactaaaatTgctacgctagggctgcttTactagtagaa  
gattcaaaggattgccaagagtgactaatgtgctgcacaagctctgctcaagatttctaattatgaaa  
ctggagaacccccaaaaagataaaagaagagagccaggattaaaacctacccttctcgcccgggagggga  
aggaaagcaccagccctcggaaagagctaccagggcactacttcatctatgctgaaactctcctTgatcta  
tagggcgaatgtaattcctcacatagaggaaatTaaagacttagcccagtcctcagtttccactttattt  
Tgaaatgaaaaacttcgcccagcgaagactcgacgaattaggcagatcggaaatcagcgccttatctcct  
tgattgaatggcctcggagtgaaacagagttgactcaatgtgtatgctgctTaataggggtatcggTacc  
gtggaccggaatctTgaatcagtgaaacttagccaagaatgaatgcaaaaggaatagaagctctaagc  
aagaaggaaaggctgcagctccaatggTactTTagaataataggTcctaataagggcaaaataataggTcct  
ttagcggTTTTTgagttgacttctagttctggaccgatgggaactcctactcataaacgactagcttctt  
agcttccagcttataacacctTTTgggactctaagctaaagtaaggaaaaggccttccctTaccaggctt  
ttgagTTTTgaaatctaagtaaggagttgagttgtTccatctagggagaaaaggtaagtaaaagctgtctc  
ttTgaaggactTgcttcttagttgagtaaccattgtggTgtcgggggaatcgTactTTgggatgcggg  
caagaagctaataaggctcgatagctgctcagaaagagggTtacttcatcccgcgaagcgagTcagaga  
acctccatcttccTggaagtTtctctgtgatgaaggtctgtagTTTccatcggaaatcagTgctgtgag  
agcttagaatctTTgaaTggacaaacgctcacatcaaagctatcaagcctaagTgagctcttTccgTg  
ggagctTgtctcggaggaaccgtTaatcgtggaagagggctcgtcgagacctctccctTgtgctgctcgc  
TgtTgctatcatctTgtTggtagTgggtTtcggcctgtTTTcatctcccaaatccctctTcaacaactTg

tctagagcttccctgacccaagtcctatgggtcggttgccttcttgctgcagatctgtcacacgagactcca  
gtgttgatcatggcttgggttatcatttcgatctgggttcccaggatcgcctttttctcctgaagatcagg  
aagaacagtgggatctgggttcgggtgccattgcgtaacctacgcgtctgataccaaatctgtaacccta  
gaaaagataagagaagaaatagaaaggaggagaaaaagaggagagagagaagagagaaaggtcaactg  
atctaactgatagatgaaaagacgggtggcggagaaagggtccagcaacccaaaaccataaaagaatcagatg  
ttgcatcgggttgcgaatatgatccagttgattcataggattcggatcttgagactgatgcttcggcgaa  
tgaaacggcttatgcgatgcagaaggatcgggatctctgttccgggagaaccctagccgttgggttcg  
atagaagctggatgatatgtagttcgagagaaacgatatgttgggttaggaggaatgcgttctttgcaat  
cataggctctgggacagatgacttgactttctagttagttcatttgtcgggtgttacagataaagtcactgt  
gaaatcatcccctgttgtcaaagtaagcgggtgctagtctgttacagaagggttgataaataagaatcg  
gttatcctaagcctgggtcgaaaacgtgctactcttactgagactgctgttgattctcataatcttgattg  
taactttgcggatcttttgatgccatcagagattgacagagggtaccctgtgattaatgtcttttgctaa  
agacggcattctattagaaatggaattgcgcaaacctattttcaaaaagccctattcatgtttttt  
cttctactagcgatcttcttgaatgtaagggcattggctggcttcttcttagcatctgtgcgtgggtt  
tactatcttaactgaacttcaagttggctttttcttatcctctccttttaagtcgagttgctaaagcacct  
ctccttttaagtcgagttgctaaagcacctctcctttcagtcgagtcagtcagtcagtcagtcagtcagtc  
cctcaatacccttgaatccttgaagtttcttcaatttaggtaagatagattagataatgtatctccata  
gtgtcatttgccagttatgattaacggatctccatctagcttcttcagggggggccgcggtttgatggaga  
caagtttcttagagcctatctttttaccctgaaatattcagccagctttttaacaggggaagtaacaaca  
agcggataaccattcaagaagatttcataaactctatctttctcatataatataatgctgatgtgctcat  
tttcgaggagagctccgtgctgaatgcgttgggtcatcaaccaagtgctgaattagtttcacagctaggcg  
ggcttttggattaataaagccaaatgttccctatcattctcggccaccagttaaaaaaaagtaaaactaa  
aaatcattcgtactcttggcttacgtgaggtgcagctccctctcaatactgggttttttcttagtatct  
accagattgagacactctgactgtctccccctcttggacaagttcaatcgccaaattttaaatggaaaa  
gaaaagaaggctgctgctcatgaaaggcttgcagacttccgggagaagatatagaaatccattcattgagc  
atcgggatttcttttgggtcaggccccgaaccacctataagatccatattgatcagctgggtccaatgtag  
accgaaggatgaaggtggattgggtttaagaacaattgagggctggaataggactgccatgtaaaagctt  
ttctggagagtagttaatgataatgggtccatttggactcaatgggttaatttgagatactctggagac  
attctattttgggtgggctaagcttccatccgactgatcttagtcttggaggagtgtcggtaagggagatg  
tggctaataataactataaagtgtcagatttaatggcgaaagcacgaagctgtggcatgtccgtggct  
tagaaatggcccgatcagctacaggtacgaggtcactgttataagggaaagaggtctcccgaccatgc  
tctagtaagcgatttaataaaaaatgggcatgtcattggacccttctccttagccgcagaatggctggac  
agtgtctaataagagattgacctgtatgaactcttttttctcctggttgaagacaggatcggttgg  
tctctcagcccggatggaaatttttttctccaaaacagcctggaacctcattagggcagacctatcctaag  
gtcactatgcaggcatcggtcggataaaattttaatatcccaaccaagccacagatattatcgctgga  
tggcctcaactctgggcttcagcagatcgagttagcagatcttatcccaaccaacaccgtgactctttg  
tggcctgtgcatgcttgaagatgaaagtgcgaacatctcttcagtcagctatgcaggggtgggtttttt  
ctcagctcagttcgaaatgtagatagatcagcctgcaaccaaccttcatgatgttggcaatggattat  
aaaatagaaaaactaagaattagaccttactggcctgatcctaagctctgcttactgcagtcataata  
ctatgggctgagagaaatccaggcgccatgaagggaaatccaagctgtaagcagaacgtagtttggag  
aattgtaagggaaaagtaaaactgagactgcatttgggttctctcagattaaactgagagttatggact  
ctttttgcaactcaactccgttttttgggaatgcatgggtaccctgctcagctgaatcttactcttcttga  
acctccgtaaaacaaaagtgaacacagacgggtcagtagcaatagaggctgctgcgggtgcggcttgtgat  
agcaagagactttatcggcctctttgggctttccggaagacgggttgagtgagagagataatttgaaggtg  
aactttatgcaatccgccatacgggggagatggcttcgcaataggcattcgtaacctttgggtagagtc  
tgactcattatagcagtcagatgattaactccaagccccataagcgcgaaatatagctgctgagcttca  
ctgaaaatgccagagcagtttgttttttagagtcacacattgttggagggagagcaatagagccgccgac  
ttgatttcgggatgtcaggttatgtcttaatgtaccaagaaacctcccttagcccttaattacattatt  
agagaggatagcaggaacttctttatgtacgtgtatgagatattatgtaccatcttcttaataattatta  
tgtattatataataataaagacaagaataatatttctagaatcttatgtcaaaagtaaggaccaaggat  
aatcttttcggaaaggaggagtaggaggagtgcagcggaaatcaatgattacgagatagacaatgttcga  
atccgaactgttggcaatggctgcaaccttttcttggagtaatccaggaggtgggacaaggaatgtccct  
atgctgcaagttccacagactttaccctgggggggacttcatccgttatgttggtagaaagccagatga  
tctatttagaactgtggaactaaatgaagataaagtggtggaagatctgatttcatcctaaggagtggcga



ttcacagagcgccatttccacttttgcgaaacaaaagatccaaagaatcattgataaagccctcgatatgt  
atggagaaggaactctcaaaagttaaattgaaggaaaagaaagggatctccgagatctaaatatcgagga  
gagcgatattcgcataggtatthaagcctacttaagcgatctgcacagcttcccttcaaagcgagtcgt  
ctagggcatctcaaaagcgtgctcgccctgtattggaaaaacaaaagtccaatatggcagggcatccacg  
aatatgatcattcgctttcaatcaaattagattgtccgggtgcgaaaaaacttctatgaaagtgttcaaa  
agagaattgcttctatcaagatagccgccttgtcagaagtccttctccaagcagtttatgctttaaacc  
ctcgccgtagaatcccttaaccgagatgaattgctaagcttctcattcgttcgataaagttaatctacag  
aatctatcctcacctatccttatgcttttctcacagattcaacaacaaaatgtttctctcggggatcga  
tgaaaggctaataccgatttatcttcccggcgcctcttgctcttcttgaaaggtgtctgggtcttgttc  
tagcagctgacaatcaaggactgagcatgggttaggaccaaggggtaaatgagagactgagagcaagga  
ttcttttttagtaggaacaagaagaacatcactaacaggtattctaccttctgtggtagcaagagttg  
ttgaaccgacatgagaaataggaagataagcaccatctccaaccatacttctgagccattgtaaactaga  
gactgttgtcattttgaaactgaatccgtgacatgagtgaggagaaaatgctctactgagctaacggtg  
gaggaagggcagctagaagccggtagcaaagcaaggcaaagcagatccaaaagaagaaagaagtcgagc  
tttagctataactacagtatattatttttttaggtaattagaatatcgtaagataagaaagaattg  
acaagcggataagtttagaaaatccgggtgggtttttatcgtgagctccttctcgcgagtcgataccttct  
cgccattattataatggcgggaacatattccttttcccttcaaactcaaaaggaaaagatgctatct  
atccattatgcggaacatccgcccgcgaggagttagagtgagtcctatgcttccctaatttctgactgaaa  
gtcttcttagattaagaatgaatttccttctccattaacggttccactcgagttatttaaaccctcttgcct  
tgctcgagtcactccgtacctctcctttaaagtcgagtcctatggacctctcgttttactcgagttgcct  
ttaagtctccttctcaacatttctactacttcttgcctcccggatccatcattctcgagtaggagga  
aaaataagtatacttttgatcgaatggcagcttagaacacagagtcagcacaggacttttcttgcctc  
catcattcctctttagcttggactgacgcttctcgttgacgttcaatcttattctgaggttaagttgagg  
cagtgacaacatcaataatagaaggcgcataccttatccgatcgtagctcacttcttcttagcagctt  
ttctcctctccttccagtcgctcgttgagacctcatcaactagttaatgctcgtcgagaccttcttct  
tttgattctggaatgcttcttttccaggatagatagggccgacaagatcatcagggagaagtcaaatc  
acatccgaattcaattgttctttccaagaaccaaagtggagaacctggaagcgtaaaccgggggagatg  
aagcggacaaatccaagcaaatcctcggattctattctatcgactgatcttccctctgatgtcgtctat  
tctgtaggaatgagagctagatcttctatattcatcacttctctcttccgagacagccaattatctat  
gagatgggatcatctgactattctcactttctcacttgggactgggaagtttctcttgatcgaatggg  
ggctagcgtgaagccaatagacagggatgagagggggacaggcattgataccattaatggaggactcac  
tccacgcaagaagatgacacactgtgactgctttgttatagaccgggaactgactggtaaggaagagt  
gagaactgatgggctcttcttctctgaaaaaaaaataatttacgcttagaatgagacggatgaccttcc  
atattatccgactttcttccgggttgacttctcctcgtcctcgtatccctctttttcataaccggcctatct  
atcgtcttggaaatccaaatcgcttgaaagcataggagtggaagatcttccctcaagagttaatcccagt  
atcaaagattcattcaaaactactatccagagggcgaagaagcaagaaaactccagcgcctaactagctcatc  
ttattctagttggagtgagacgatccttctttagcagtgatacaggaagctgttccagtagaactatt  
gaccgaagagcctgactaccagagctagtaagctagcgggaagagctcagctcctactataagctgatgaa  
gagctactatcaccaagagagggcgaagaaactcattaattcattgatgagggctccccattctcttct  
aatctgcagtccaatccttcttaatttcgaaactcatccttaagttaccaggggcaaggtggacatgaa  
tcaagagaataagctctttaatcagaatacatagttgaatttagtaagaggtctacgggtgtccacgattg  
tatccgactattgattgagtgaggccaacttcccgcatttgagtgaggccaacttcccgatgatagaat  
aatacggatgtataaaaaaaaaagatagcaagatagatagcccgaccacatcagccccctctgacgtcga  
atgatctacttgcctgtacttctcttctgtcgagattcagttggtcttcagctctaccaccaccactgtttt  
agtggttacacttacactcctcggcggggctcgcgccttttatttgcattccttccgggtgaaagggcca  
ctgaagaagattatctatctcttttgggtcttttcatcgcgggtgggaatatctttgatcggatcaaag  
ccatccacctaactgggtctggctttgcccctgttggtacctccttgggtctggaatgccataggagggg  
aggggaagcacttcttctacgggcccctaaccggggcatcttctattcagagtggtttacctacagctct  
gatttggaggattcggccagttccgggctacctcctcgtcggatgaatcaaccgatccagaggggaacagg  
ctgggccatccaatgcttacccegaaccgcgccttcccagtagctcaacagcaggatcactggatca  
accatttgggtgaaggtggggaaagggaggctcgggcacaagagcagcagccgcatctctgccgaggtagag  
actatcacgagcgcctgcgagaatttggaggcggccatggtaaggaaagccatattctcttgcacaaac  
gtggagtaactctcggggatccagaggatgtcaagcgtgctctccagttggctctccatgacgactggga  
gcacgatatagatgaccgtaagaggcatttcaactgtgctcagggcgcgacttcggaacagctcgtgtgaa

agatggaatccggttcattgatgagctcaggggcttggggaaccgctcaggtaaacgccagacattatgtcg  
actagggcgtgaggaaccacaggtttttaaagatcgggttgagtggttttcattccccgggccttatggaa  
agtcggggcttccccctcttttccgaggaaactacccttgccatagctacccccagccaaaaggccata  
gataggcttttggccctaaagctacgggttaaggccccagccaattctgaatctgaataaaaaaacagttg  
aactagagttttccccctacttgatgagtggggctcgcgctataaatttaagtaattaattggccaaccg  
cacctaagatgactgagaacaggaactacccgatcaaagagctctccttctgcgccctatattacataa  
aataatttgtggacggatgcccttgatcaggaagtgcacatatgcccgtataggtaaaatacaatacgt  
cgatcactactaaaatacaggacggactagaagggacctaagcagtccttgattgggagatttaacccctt  
caatagcagcccttgactgattttaagctcttactggcgcccttggatgtctcaacttgacctcttat  
tgccggttataggcttgggtgtcgggcccggcagttcaaaaatgtttcggatacagcccaacacgctctt  
cgtctaactcgggagaaaaaaggaaaaaggcgttatgtctgtgcttcccttccctttacaggcaagcttta  
acttcccttccgggaaaggaaagaccttgaaaactcttccgatataggccagaaaacagcttgcttaga  
gaaagactgactctcctacggacctgggtggaccttacacagtcgagttatgcatccctctcaciaaaga  
aagtggtaacaggtagtagctctggtagagtgcaggactgtaaatccttctgtgagcgggtcgaatccgc  
aatcacttatagtttagtaaaaaatctcttgccaaccttcttccgagcagagaaatggaagagagttct  
tgatcccaaagattctgaacgggataggatgtgacagagagagatagggacaggagaaacgaacagagtg  
gagggctcactacttgccatagagatttcggacaatatacaagcaaaggaatccgagaaacagcgtcaa  
agcctagctaactaaataccttttcttcccgcaagaaagcacatcaaaaaaggaaagagctatctagtc  
ctacaattcttctcaatccactccgactgactattagcgattctagcttcaatcgtccgatcttctct  
cttctcttagatatagagaaattaatttaaaacttaagtagaaggcaatgaaaaggagtttctagccgg  
atcttctatctacgcaaattgaagagatgtctgctaaagccgctgcaattgaaatgagataatctgcagca  
attgatgtttcttccgcccctctcatcaatgaattaatgagtttcttccgatgggtattagagtaagaca  
gccaactatgtgggattcttcttagactagtatactctagctccttagcactagcaatagtagtattag  
aaagtgagagataggcctatagattccttctgctcgtattcaaaggatactatagaaggctgagaactg  
gctgtttggctcatcaattccaacaacgacccaaaacgggtacatcaaagctatcaagccctcctagcgc  
ctaaaagctgtgagaagtcttaacaaataagaatgccaccgcccaagcaggtacgagaacaaccctc  
catcttccgtgcaacgggacaacaatcaatcttggttgggtccgtagttgaaatgaaaactagggaaatcc  
gttctcagtgagtaagacagggcttacctccccttcatcccttgcttcttggaaagtgttctcttgagt  
gaaggcagcataagtgcatgggtcacatacgtccgcacaccaaaagcctcgtatgcagatcctagtcca  
ccatccatgtctgctgaatttgatgcattaatttccatggcaccgggaactagtaccatcatctcctc  
atcaaaagattggtgtgggtcttcttatcgggttaagcggaaacctgatggcagtggtgagcgggtacaag  
gctcgcctcgttgccaattcatcagcggcctgggataagatcctgggtaataatgtaaaagaaggagg  
acagctgataaggctattgactccactgaccggggcgcagcagatgtggctaaacatttgatagactcgc  
atcgaaggaagatttcttgctttagttcgatgggagggcataccaacttaggtcaactttatgggtacgtc  
ttcattcaaccgcccagtgagagcaagcgcaccaccagctcctcagcagagaagcgtttttatataata  
tataaattattatcgatcgaaacctaaagccaagtgcacgatcggtttccttgcggtgggagggagatt  
gaatgaacgcttgaaagctagcggggactcagagagaagagagccagggatatccaaccaggaatcgca  
cgcaggcttcccggccccttctctgacgaggggttgccttacgagagatcgaatgcttcaaagcaggg  
aaaagaagataggaagattggatggaaaatcgaggggtgggaaccaaaactcatctacataatacgcact  
ggtaccacatgaagactgttcccactgggtgaagaatcagatttatgactatgggataataagatccaa  
tccaattgatggatggaaagtcgactcgacgatcaggtagcctcatccattctttaaagcagtagcgaac  
aaaggacgccgaggggaaaagtctcctattccttccaccagttcagggcaaatgatgaaggggttccgg  
cgcaaatgaatagtagaaaaaggtegattcctccttgcagttgattaactttcactttagttggacatgg  
caaggaaagcaggaatgtcatcaggctcagacctattcttgcaagaaaaagagactcgctctagtcctg  
taaccattcgtaaaggagggggcgtgggaggatgcatttactgtaaaagtgggtgtgtcttaacggaa  
tgatctcaactcggctacccgctcctgggtgccaccggatccctaggtcttgttctgacatgtgagattta  
gatagatgccgatgaatccacaacttctgctgtgtaagatgagattgaaatggattagaagctagctca  
atcattgggttagccaactcaatatattgcttgggtggaagtctcctctcccaagaagcataatgtgt  
aggaccaaactgccaatgaaatgcattaagccattgcgctagcttttccacaagaaatgaaatcatcga  
attgcataatcatalataagaattatgaaatgattggcgcttgaaatgggagtttcttgggtcctgcca  
atggctcttataaaaaagtaaaagcgtctcctctgatgaaggatcaggatctgaagaagcgaagctata  
actcgactaaaaggagaggaagtctcctctactgaaagtgggtgtgatagggaaataggtaaaggccttgcc  
ttattcaaaagtagcaggaagtagaagagtcggcattacttctgttgaagttttttccagctatctcag  
ctctgggaggaggactacttcttttcaactatttcgagatgcgtgaatacattgagagatagccagctct

ggaaagagcagatgtgaacaaagctaagaaggaaagcagactgacttccatttcttcagtaggggagaaa  
cactctttcttgggtgactgctgggaagcttgacttgggtctcaaaggcttggctagaaggcagaactctt  
tctttagtggaacaagccagaagaatcgaatcatcgccaaaagcaaggggaatcaacgaacgatctac  
gaatatcaacggcttttctacggtaagaggaagggacagggtaggaacgaagaagtagctaggcttt  
cctgggtgggttatgaaagtagcttgggttttggcttaggcgagtgagtcacttccggatgaaatgatttag  
gtcccaaatacagtagccgttcttccagctcctatagtttcaaagccaagtcagcagctagagatgaatcg  
attgaagaacaaattcacttataataggaatccgcctttctttcgcctcaacgcgggcaacattagatt  
cgtcagagtcgctagctcttcttctgttttcaagaatccttggatgactgcttcccatcataaagt  
atactctctttgggtcattaccctcggcgatgocacctggtagtaccctggcttttagatccaacttgg  
tgaagaagcttgcacatctccaacggatcgaataggtcttctacgcgcagaatcaggtacttatttcttg  
agggtaaccttgtttagatataggttagtcgatgcatagacgtaggctcccgttcttctggaacaacac  
tggggcttcataaggtgcttggatggctggatatacccgcgctccaataactcctctgtcaatttaaag  
cagggctccgtctctgttctgaaagaaaaggaagtagtgactagcagggaaatatagaagtttgcctc  
cccacagaagccagtagctagagaggataggatgtggtcgaagccgctggtaataccccctaactggagt  
gaactctcccctatagtgagctgggggatgacatgtagtttgagtcaaattatggaatgaaacggagt  
tgcattaacttgagaaaaacttgtgtccaatcgctatagaaagaagttgaaacagcagggaaaataggcct  
tagcatggcatttctcagtcgtcccccttcttataatcataactcgataagcattaacaaagcctttca  
aaaaggtccaacgaacaacaacatgaataataactatataactcaaatacagtgactagattaattatg  
ctctgaatgaaggggaattcgacttcttttaagagcaatgttaatgtaagtcattgattccgttcagtcag  
tccctttccaaaaggtacatccctcactccttagggatattgtatgtatttgaagctcttaaactctgat  
ccgcttgccgttgatgatgatgacggacagtgtagggagctctagacgggattcacagattgaatctgcta  
cttctgtcagaagcgggcccagctaaagcgggtgagtagagggctagagaaaggggtggatcgtagcgagga  
ggggctctcgggtgaggggaccgagcggtagagcccttgtagttcactaaggtgctattgagctttagtt  
gctattcccccttgtgtacatatacatgacatgcttatgcctaaggaacccatctccttgccccactaa  
ttggtaggctgaaccgcatcagggccacacacgctgaatcggcatcactttcgttgggaaagacaagacgc  
acagcacaacgggggtcggcatcggacaccacaaaggaaggttctctcgtgttttagacaggaatcagcg  
gcctgggagagagctcttttgatagattaagccctgtgggttaagcctatcactatccgtctgagagctta  
ctctataccatgggtggactcttcgtcaattggatgtcaacaacgcttttctacaggggtcacttaaccga  
aaagagtcagctcaacctcccggctcgatactcttcttctcttgcaggtttcgaaaagctatggctct  
aacaggctcctcgcgcctggatcatgagtgaaatttctgatagctgcttatatgccagtcagcagacc  
tcttcttctattatcatcagaatggaatggaatgaaagccaagcatctactagccgcttagccagtaag  
gggaaacgctcctgcttagtacaaccagaaagaaagaatgcagagtaaggccgggaataggcttcgtaag  
aggactgtttgaggtactctggaaggacagttacaccatgccagcgggaagacttaggataagcggtcac  
taccatcttattactatgggctaagcagatactatcaccttaatagcagcaagagccataattgaatca  
cgaggctttagccccgaggaagtttagaacaattgaaatagaattgacgtacaattaagatgaatcgac  
atgtgattcaagattccccctcagatgaactatcttacctgaggcttatagccttaatatccatgtagg  
tgaccttctactgagcgaatcattaccttctcttcgctcttagcttgaagttcttcttggcgctactgc  
ccagccgggggtgaatgtactggatgctgctcgtcaaagtcгааagcaaggaatatcgcacgtaagagatcc  
atagtacgcaagagagcttttctgttctgttcttctttaaataagaagcagcgccttggcctttatc  
accagatccgcctgatttggaaacagctgaacctcttgtattgctaaatccatgacttctttttccaa  
tatcccttcttcttcttcttctatgattcgcgaaacatgaatttagctaccttgaaccactgtaacggtc  
tcccttctaataatctgggttcttactcggccatccatcagcttccaaccattacctttattactgctca  
atccatcacctgttccctgttctggataatgttagctgcgctttcattttatttcttataataatttca  
ttacattatgaggagatctttatagcaggatcttcagtttcttcttctgctatcaatgatctttggatt  
ttgttgggtatttcaacgcgggcccagaaagggcttggaggtgagattcccaccagatcttctgtgct  
tatttctctgctgaagctattagctcctgtaataactataactcactcacttctgagacttgtttttcga  
ggtgaggagtgactcgagcacttgttgcgagaggtgagctctcgttctgagaaaaatagcttttattagt  
tattagaagttctactaggtacaagactcttacctttctaactcacttttaagggatcgttttttatttg  
gacaagcatcgcgtaccatatttgattgacaacctctgacttcgtttatggcgtaccccgactgatgg  
aaagtagtcttgccttgttattgatcgcctagcttaggggtgaggaaggatcatcactcaataccttca  
gcctctgggtatactcgatgacagtcctattctcgggttggtaactaccgtggtcgcggctcattctcta  
caagaggaagaggggttcatcaacgctatcaagccctcaactagtttgcatcaatcccactcctctgatc  
agttcttctctcgaccgcttgcctaaatctgtggctaaactggctcactcagccctaaaatgctggaacca  
atatgacaactcctccagaacagtgatattccgcaagctcttgctgctcttcagatcacggatacctct

ggtacagaatgggttccagattctggtgcctcctctcacattaccaattctgctcatcacctccaacagt  
cacaaccttatgtgggatccgacagtgatgggtggggatggagccttcttgccatcactcatgttgg  
atctaccaatctaccaagctcatcaggtagttaccattaaatgaagttcttgttgccttccataact  
aagtctcttctctctgtgtccaaacttctgtgatgatttatccatgcttcttggagttagtgtaacgaa  
gtatgcataaaggacaagcaaacacggagcctgctgagcaaaaggaaaacgggtgaaggacatctatatgt  
tggagaattttaactataagcttctactctacaagacaacaagcagctagttagctcacttggcatta  
taggcttgggcatccaaatcctcaagttctccaacaactcaagactagtaaagctatagttattaataaa  
agggatcttctgttgtgaagcctgtcagttgggcaagagctctagtcttctgtttccaggactgttat  
caccatctcatcccaccgatccaagttctctgcttctgcttggcagcttgggttctaaaccttcatatg  
tcccttctgttccaacagacagttcctttatcacaccttccaggtccctcgatcctccactctgcttcc  
gcactcacatactgctaattcttctctgctatctcgacatcttcccgggttccacaggctctgattgcca  
atctgcagatccttcaattgtctctgagattgctcctggaactgctaccacatcagaaagagactgtcct  
gtgctgacggcaggctcagatcctgttccctattggcgacagcgggtacctttttgatgtgggacagctg  
ctcctgagctactttcacctaataagacatcatatgatcactcgggcaaggatgggtatcgcaagcctaa  
tctctggtacaacctgtttacacaaaaatacactccctctgaacccaaaaccattacgtctgctcccag  
gatggagacaagctatgcaagaagagatgtcggcattaacacagaatcacacttgggacttagttcccgc  
atcacctgacatgaatcttctcgggtgtaaaatgggttttcagagtgaaactgaatgcagatgggtccctt  
gacaaactcaaagcacgcttgggtgcaaaagggttctcatccaacaaggaagaagttagtaggtgat  
aagaaagatctaactctatagtaggctaaggctaacctgttccgaacttattagaatccaactcttata  
tatagtaggctaacctgttccgaacggatcctttcacttagatttttcatcttagcttgtagttgttcca  
ttttcctctgattctgctcgtatcttgtcctgtgatgaagagtaactgagatgagtcataaggggtca  
ctccttttcccttctgtctcatctactactccatgagagaagggtgagaactcatcaatcaaaaactttt  
cgtataataaggaagtggttagtctatcttctctcttttttcttctcttctctcctgctcttctccatgcc  
tgctaggaaccgctaatagtcatagtgggacctccttttatgtctttaaacaagtaaaagttcttgtctaa  
ttgatcaagagaaggggatcactactataatgaaatacagacggacctgcttggagtgtccttctgtgc  
tctgttttaagctggaaagagtgcttcccgatccgatgggtgagctccggagatcctcttctctggt  
ctggtttccggtaggatgaatttcattttatgtttgacgcacatcgcatatagtttagcctgactaaggcatcg  
atatcaaaagaagtaagtgcagctctcatgaaggtaagcacattttttttattagacgatctcaagggt  
cgggacacctcctccagctcatttaggcgaggtatgttctcttggcctgagagttggcttcttgacgtcg  
tcttataggtgggtgggtcgggtcagaagggtgcgcgaccaatctctctcgcgactaggtgaaccttcc  
agtcgctcgtcgagacctcatcaactagttataacctccggacctctcctttatcagtcgatttggacc  
tctccttttagtcgagtatgtaacaaggaagtaggtgttacatacttgtcagctctcgtctcagctgca  
gttgttctctggcagggactagaccatttggagagtagcacttctctcacgaaagcatcctacgcacaa  
gcaaagttttaagcagctctaactggaaatgcttatgcgggtggagctcagcttatcgatgatgatgta  
gtatcttttctgtaggaactctctaggcacttctcaagttatttgcagcatttccgggtataagacttggat  
tgctatctacccttcaaaagttcacagcctagctagcattagtttgagcagcttgggttctgagtgacagc  
attagctcatcgggtggaatatagagaaaaagtgagattgatgccattttgatataaatcgccggtata  
caaatgaaaattctctttccaccacggctccatagagctaaaatgggtatttcatcaaatcctcgggtat  
ataaagagaaagtttgcgatgtaagatgtgctcttacgaaggaaaataggatttctacttttccatcta  
tataaatgaaaagaaagatttgtgttagctcgcctacacaagccagggatttctacttgacttttcagt  
tgcttatccaggcttgggtgtaagggaaatgggttaagccagctcgtgacaaaagtacctctcgggtcttct  
ggtcgagaccgatccaggaacctacccttgttatcgattgatagaataatacgtatataatcagaagg  
ctgcttagaggagtgatctagctcttctcttaacctctaacttcatatttataagaagaggaaaaaaa  
acatecgcagcggagtcactttatataaatgaaaaagaacattataacaactcagttgttcaaaccgata  
acgcttttatttttttccgggtatacacggctctgttaatatagagcgacatataaatacaaaatctcgaa  
gaccttggcagatcttctgtcatatatcttgtcttatttgtattttatcgaaaagaatcttggtttgg  
tcttctcagttattggatcttttggccatcgcctgattgtccatttgcatttgtcttcttggtttcttg  
acacaactccttgctatgattcgaatctcatagcttttgccgcttctaacaacgcttcttctagctgga  
ttggaactctaaatcccatccaagctcaagcttaagctggaccaatgtttttaaaccagccaacttgatt  
tacatccctggctggacaataatagggcagagaacgtcgaagttgagagcgaaactcttctcgcgcatacg  
aaacctcaaaaattagttcatggattgcctccactcggtaaaatacgaaaccttttccagagattatttg  
gaccacgcagtcacattcatcactatcaaaagtgcctaaacaacgagctattcgacattataataatgg  
agcggaaagcacatttcaaaaataaacttttactttattggtaaacgaaccggatgctgcgcctaatcaa  
aatttgatctcaatcaccctgggccataagaccagaagccttggagtttatagaaaacaacatgaatagt

ttcaatcttcatgatccccgctctcattatgacaaaagttttagtagagcagacccttcggtactgtatcc  
aagatgcacaacgaaaacggtcatcgctcagctatatatagaattcctccggcatttccttggcggataac  
tagaagtgaaatctcattttccatggttatcttataagtcctttcttgtcgcagttgcttactttcttcca  
ctattctgtacctctctcgattaaagacattcgggagctggccttggcttgatggcataatgtttttggct  
agagaaaaggagcctttcgctgtaagagcgtggcccttgcctggtgagtttgggtgcttccataaaaa  
ggggaagtggagtggtgaggcgggccccttcattaatgattattaatgattagggcagagaataatctcat  
tttagtttgggtgctaagatacaaatgtaaatgagttgtttaataggttttatgacagtgaaacaaaatta  
aggcgaaggcaaatcctcagtgacttttattttttccgcagcgcattcctcgacttgggtgaccttcgca  
gcaacatacacagttgacgtggcctcacatcccgcacttgacgggtggacttctcacaactcattggcaa  
cagaccgggttggccttggacttcgaccgggcatgagaacacaacatcgggtttttattcctaacttctt  
tcatcctcgtttataatcgataattccttatataagaagttataatcgataattccttatataagaaga  
ttcgaattccagtcacttttagatatcaatcgataaaaacgcccgaagaacttcgcccgtgtggacc  
aagtccttttaggcgggtcccgcgaagtaggtccccggcgtccaagattgtacctactactggaataga  
tcttctgttcttcttggcttaacacatagaagttcattcttggcgggtggggaataatagcctaaaagtca  
ttgttctgaattcagaggagtcagtaaaagcacgcataaggaataaagagagaagtccccgttactataa  
taggaatgtgcccacgggagagagcggagttcgttggcttgaaccaggttccataaagaaccaatcttgt  
tttcttcccttgcacactctagaatgaggaaaagtaagattggcctattcgagtttggaggtctgtgta  
aaaggaacatgaatttccacccttgttttcttcccttcaatggactgtgtaaaaggattggtttgtgtt  
agcgataggttgcctcaaacgatagccaagtttgatttggctgttttagcctgggtacgtacacatacgc  
gtactatagaatctagatgtctgattgggtctccttgatttggcttctcctctagctggatgggttcttgc  
tttctgccttgattgagaacctcgaatcgttgttatcgtttttagtagaattgggttcttaataataggc  
atgctgtctcctcttttgattatcctacacgcacgagaggagcagacgggtgagcgttgatgggcaggt  
gataagatctgtattggataagtttctttcacctgtaccatgatatgcctgattggctgtttatagaatt  
ggccaggaatgctgtcactcaattactaggtcttcttcccacgtgtacgtaaatataagagagtgagg  
ctttcactatcgcctaacgttttagctaaggggaagcagataacaagcagcggaggcgggtaagcggaggc  
gggtaagcagcgtattaatagttaagcagcggaggttaagcggaggaagcgtaggaatcggttactcaact  
gccttagactagtgtagcccgataggactcctttaaagtagtccgacggctaacagctaatacctgcta  
tctcggcaactcctaccgatcaagcaaggaagaaagcaactcctcgtggaggggacaactccagctcaggc  
agagctaaccattgaagaactaactgatagaactacaagaaccaaaggaagaaggtagatacttaagtt  
aacagtcacacaaaagaaaagcaaatgaagggcacaagaaggaacaaaggaacagaccttagagaagaagg  
agaacagtcacagatagattcaaagctaaggaggaaacgagtaaaagaaaacagatggcatcttatataga  
gtatagagaaagattctcacaataaaaacaagaaggagaatttgactcttcaaccggaaaccgcgcctgt  
gtgcctaccgagctagcaacacccccctctttctccccacagaaggacagtgatataacaacccttaggt  
tacaatcaaccatgaattccaacaaggagaagccaaggaacaagacataccgaaggaggccttagctagt  
ctaataaggacaggtaaagcaacaaccgagagaggccttggcctttacattttcagcatcccagctccat  
tcgcccataatcaataaatggaccactaaatataaataggagtccaaccgggtgacgtgtattcagcaac  
accggagaggaataaccataaggaaacttctatacatatccggtaacagacaaaaagcactactttaata  
atcactgatagagctatcggagaacaatagaacaaggcgtaccgagcgtaccatagaaagacacgttcg  
cccgccttcgacagaccttcggttccctaagaacacgttaggaacttccctcttgatcgataattaagtata  
aaagaggattctctttccagttagctattaatcgagagaggaccgaccatagaaacttagccgagagtg  
atcacaagtccttctacgtaaggcgtcccgcgaagtaggcaacgggtgcctctgatcttttcttactact  
ggaatgggaatggaaaccttcttttcttccggtggggaaaaagaccttactccacttatacattgaagaa  
agaccaatcccaaaagatgagtaagttagcccacttgaagtagagtgattgtataccaagctatggattg  
tctaccaagctatgtatttcccccaaggtatggattggatttcccgctgaagaagattgggtctatcccc  
gctcaagaagagtaagatttccgcctctaaataaagagtaggagtagatcgcccgggctccgagtgata  
ggcctagcgcgtaactgatgccccggcttgcccccgggatgaggccccctggaaacgctattgggtacgcgt  
cctacgaatatgggttccgatctcaaccgattccttgtccaccgatcgtacctttccttcaccttggttg  
aaaccgcacttacttgggttgccttcagtcgtaacttaataagagtcctgcctttagccgtaacttaataagag  
cctgccttcagcctagcttgggtccgggtccgcgctctataatctattctcttctcctccctgcgttctgc  
cttgattgtagagttggaatcgcggttttctgtttctggagaatttctaccactgaatttggttgtaatt  
tctcccactgaatttgggtggaatttctcccactgaattccaactcgaggtaaaacaggcataggaatcc  
aggcatagaaagagtaaaaggataagaggagctgtgttgaccctaagggtgatgtgaaagtcggagtaaa  
tttccaactggatcaagcagatggtaggagtagctggatttgaatccctgagtggttagttcgttaagt  
aaagagatgacttccaagtagttccattccctagcctagtagttcccctatcgtagtagtgaactatca

aagatccaactgaagtaaaagtattcacctgaggataggacgtagtccggctcgtttgaccctcctaagg  
aatgctcgtactgctgctgttactgggacggctagtgtgccgactgttttcagcctatttgggtgcag  
ctgctgtttctgccttgtttgggctcacttcacgggttcttaaactctctgtcctgcttctgccgagcttgg  
ttgtagctcagtagtgtgaggggaagggcgaacgaagaagcaaactctgttcaaagcgggagaatgaggatga  
gtctgtccacttataaggatgaaagcgaggcaactgttagaatgtctttggtggtttgagtttgaactgta  
tgatctacctcttcccttcgcttcatctgtagtctctcttttatttattggttgcttcataatgccgaaaagg  
agccgtcggcgaagaccaagcccagctccccggggtcgcatatctgagctgttcttgggtgtaaagagta  
aatgtagctcagtagggccttgggttcttaatagagaaacttggtccttgactttcctcctccccgcgtc  
cgtgaatggaatgggttcttggcacgtgttcatctcttttgctgggtcttctacgtcttctctgctgtt  
gaatgaaagctttgctcgctacgggttcggcttgcctgttccccttactgacttctacgactagctacg  
gcttctttcccttcttttagccttagatagatgggtctctttcctttaaactctgcttgtttaagcggcgta  
tattgtagctgttctgatccgaggtgagcccgatccgatcccggtgagacagcttgggggtctcttaga  
cccaggggtgacgatcaacgtgagaaaccttcttctaggctcttcccttgggtcatagggtgagttcctca  
gttagtatctttgatagcaggtaggactcggcaactccttaagaaagcactgtgggttaggttctcttat  
gactgggcccctattgtagtggcgaaccttatgagtggtagtggagcggagcactttagttgaaaagcca  
ataaaggtatataagggtacagtaatccgttataagaatggctttgaaactcccccatcctgtcttttgc  
agcggaaagtgaagctgcagcgtcagccttcttcttctcctgctcgaattactccttcttttcatctgca  
tacttgactcaaggatcgtgtacgggtgggtggactcgggtcacgttcgggtatgagatctattacctacct  
tctgctgcgcttctcttcttggccgacatctcctgccgacatctcatcgacatcacgcacgtaacttat  
tagatcggagcctttagacgacgcttcagaagtctttgatcgtacgttcttcggccccagatggagattc  
tagtgaccatatagaaacatcacccgagggaggctagagatgatacacaccacttgcgtcttgaattgcc  
aatgatgaggattggagtcctttggtagtgtgcctgagtgaggcagcagatataccggcatcaaatgca  
aggggtgcaattctttggtttgttcttagatctcttcatgcgtttcaagtgtcacaacatcaattccgt  
agggttacttgggtgaatctcgggtgaagtgtactgtcttatgcgcttagtgcgatcgaagatcacttgt  
tgcaaagccggataaaaggcataaagtgggtaacagctgttgaaataagggctttgtaacctccccaa  
cttcttctgcagcggaaagtgaagcagatgctttagcccttcccccttcttctgtaattgttctcgtt  
ctcctcttctgatcttgatcgatcaatccttccctgatcagatcttctcctttgagaatgccaatcct  
ggacaaaagctgagggcgaactatcattatagagcccttggcccactactcgtttaagtctttgaacgc  
caccttccggctcagatattctggatcagggaaattcctaagatcagaactggcctaggagcagaattgggt  
tgcttgacacacattgctgatctgcctcgaaaaaccaagtttgggtgggtgagacgtgtgtcattgcaag  
atgtgccaaagggccctctaaatgctgtggcttcgaagcgcgagacagccattttgggttccctgatcgtgc  
tgctacctctggactattgggactctccattttgaaatgctcgtgtcaggtcaacgaagaaagggcgaagaa  
tcatccacttctgttggaaagtcaagcggctcgaagttcaatgcgttgttgtttctgacgtgaaggcaaga  
cttgtcttctgtgggtgaaagtccaaaccgggtgctgctgaagccgcataataaagactatgacgctgtta  
ctgtcgcataaaagactatggcatgctgggtactgtcgcataaagactatggcatgctgggtactgtcgc  
aaagactatgccgagccctctcccgaaaaagactatgacttgggtattcctgccgctgctgccactcctt  
tcgaggtaggacgatcgtttagggcctccaagtcaaagaatgctgccactgggatgtcaggtaaaactgt  
tgcttcgaaggtcaagaaagtcttattcttccgctacgaaggtccaccaaacttagttctgctgctttca  
ggtcctcaaagtctgaggtataccactcccactcccggatgatgccaatgttttaaatagataaaaactct  
gtatcgtatgggttttagtagaatgttccggatgtcccgactgctaaatagcctgactgatggctattg  
gaactgacaaatgggtctatccgctccctactgtttgtactggagcccctgttggcgatggatctcctct  
ggttgaccggctcctgagatgtcctagctgtttggcatggctgacccgatggctggggaggatgaagtgg  
ggaccctgattgactggatgagatgggtccctctgccccgcgtgataatgtgagtagtctgcaccccgct  
gatggtagtggactgtcaccgtgaaagaggggtctgtagatccgccccgttccgagtttccgctcaagaa  
gttctatggggcccccgggcaagagcctaaggatctactcccggctctgctgcttctgcctagattgttct  
gttcagcctacttgggtgtttcagcctctatttgggtatctcctttgaaggaaggttagcagctgccgtaa  
cgcgtatagctctgagtgaaatgtatgccttcagcctccgcttgggtctgccttcagcctagcttgggctcc  
tccgtctaaagtcttatacctgctttcagccgtaacttagtctgcttctgcccagcttgtttgtagctca  
gtagtggcgcctcgtgcgaggggaagggcgaaccgagggagcgttacgtatgagcggctaaaggtcctttc  
gatagtctaaattctgaaacctccttgggtgtcttgtatcggaaactgggaacgctagcttttgaagtgtca  
ctgttttcagctgagcttagatatagctactgctttcagctgacttgggtgttagctgctggtttcagcct  
aggtcgggcttacttcgatagctctctaatctcccctgttgctaaatgtctgtattgtgaccgaaaagtga  
tcaatggcggatcttttgtgtgaaaatagtagcagtggttgttagaaagctgatgtagtgactcgcact

gggatccccgaaagaagtctcttgggtcccccgggcatatataatagaagagtcggatgggtcccccggtt  
ataggatcccccgctccagggttgtaaaaggatctgtaagggttcgctaagactgtagggtaaggtaa  
gtaaagtaattgtatgtgaaagccgaatgtgttccttgactgcccccgctgcctctctgtgtgctgtaa  
ctctgtaagggtgagctgttctctgttccctctgtaagtggttctctgttgaagtgttccactgcctaaag  
tgtatgaaatgtggcctctgtcataactctagactttccctcagggttaataagagtcctcctttctta  
aatgatagactgaagtcagggttaataaagaagttcaaatgaggcaaagaaaagagaagtcctgtgat  
ttgcttaacacacgcgatttgcataactgtccgagtggttatccgaataactaaaggtagcgaagaaaa  
agttgtgattatgggtgtattgtcgagactttgttgagtggtcgtaacgtccgttccgtgatcttgtt  
ggagtatagtcctagggtctctgggttgtcttaatatagaatgtagctcccaaaacttcaatccgaggaa  
gaaagtttgatctgtgaaaccctattgtagtagagttgcaccactgttctcttttctgagaattta  
ttcaattatataataataaattatgttctgtcgaaatgtgtttgttgtatttctacttctctaattggg  
gagagcattatctttgtaggacgatgctgattgggttcgaatccaatggtaggctgggctctcctacgc  
aggagaatcaggcaaggtagatctcctgccatgagctagcgttccctagcaaaaccatcagctagggtgg  
aatctcctgcttgagctagttactagcaaaaatttgaccgtccacgggactctcaagaactcgtagac  
tatggaacccttccaggaaagcgcgagagttaactaaatacctattatgcatgggttatcttaaggagact  
atcttcatggagctttagcaactcttttactaccctttcaggcacttgggttagtaggtgccaactt  
aatcttctacgagtaagcttctaatcctcattcctcaaaagaaggctcttctcccgtactcgttctt  
caagctatccctagcatccaagcctcttcttcttctccgagttgggtctccaatccaacgaggaatcta  
tcaatccctcgctatctttctgttccgagtcggcaagagcaatcagagtttaggaaagcatcccatagg  
ataggaggattgggtcagaaagctgataagggtatgacaaccttacggattaggcaatacctaacttact  
ggttcttctgtcagagccgggcgctccatcacgtggcgtttgtccacgggtcaaggagagtgaggggag  
gctactaaagcaccctttacctaataagcactaaagccaatccatacctaccttctctggatccct  
tcatgtaattagccttaacggcctaacggcggctcaccggccttataggaatggattgacctagcgtata  
ttgcatctcctagtcatacctgaaactacaacaagttctccaatgaggtgtgttctcctcagagttgaaaga  
agcttttttatgagcgttctaagtagtcttttgtgcaagggatagattgggaaatccttctttagttt  
gttttcttcttattctaataaacttatttctttagattatgcctatttaatacatcttttttttctt  
atgggtgggtcagggaaactgccaagttggatttaagatagataagatagggaaagtgatggattagtgaat  
gctaaagtacagatggagttagacaagtcagagatcaaaccaaacataaagtaagcagatacaaaagat  
cctcttctgctccttcttgtctgcttctaaccctgtcttactccaaccagattaatgtagagtcagagg  
ctatcgaaaggtggcttagtcatgcatgccacacaacaactcttttctcaggctttgtacatttgtt  
gctgagatctataaaatggagaattccgcgagaaatatagaatttgacgcaacgaagattagaagagat  
gaaacagaaatagccgacaggtttgatattgatgctcgataaaatgaaatcacggtagtcgcaactgga  
gtcgaaccagtagctctggaaaatgaataaatacaatcccagcgaacttcttttattcggatcgcgtt  
ttaccgggttcgcccgtagaagactaagcaaggactacatccgggggctaggggtatggaaaattgagg  
tcaagcgggcccgcgcccgcctattagaaaaagaaatgttgaactatgggataaaaacaggggctg  
tcgataccatttctatcaaacgttatacatattggagaggtaggccaagcgtcctcttgcgaaactg  
tggcgagcaattgctcgagaatagtaggaaaggggtgcgttcttgacggcgtgataccatatacgggaaa  
taaatcggccagtttctctgaaatcttactactaaagtcgagcagagcttctcctctacttttcttgg  
taattggagatagtatatccgcgtaaacaggtaaaaatctgtccggcagcaatcagccaaatggctaccg  
gcagaactagcgcagcagacagctgcagcaagtaggctaacacctcctccttcatctcgggttgagaatt  
atactcacgctttgtcatctacttattatatttattgattcctcgtcgattcttaccctcgttctta  
ttcttagctttaggcatcttctcactgttctgaagatagtgcttgacctgtttacctacaaacagatgct  
ttgtattattagaggaaaagaagaataggagtagcgggatagagaagggcagctccttttcaaagcttga  
agcagtagccactctctgcttcaataagatagcagctcaatcgaaagattgtaactaccgaatcgttt  
cattgggttgggtctcaacgaaccttggagccccttctccgtatcgaaagaacgtatctgtcgttagaata  
tcccttgggtctttatcccataccttctcattgaacatgccttgttttttattctgctcttgatgcctc  
ggcgttctcctctgaaaagggttagccagtaacaatcaccgggagctttagagaaaagcaaaggttggtag  
ctagctagagtttcttttctgcttttggatagaccagcctgaagggcggctagagaggaagag  
gcagacacgataaccggcttttagcacaatgtgctgctgcacactccttgatctatgagcccactgacag  
aataaatgaatcacttcgacgacggaagactccttagacagatcgtcattgaaatggagctgcttacttag  
tagaggtgttaagaccggaaagattgaaatcagtgactcgatccgggtcatttagacctaaagctactt  
cgggacagaggttgagtatacagcttcttgggttgcacaaacaggtactcgtcggatatactccaagtat  
caaaaatacagattgaaatctaggccttaaggaaaccggatacttaaacagtgctactaggagtaacacac  
agataggaataaagtaaaaggtccgtaagggttgaagaaagcaagaaatttccatggcagcgaagacgg

agatgcaaaggcaaagaaaattccacagtcggttgattcatccatacgaacccgaggctatagccacaga  
ggagaaagataaattaagggtgagagtgaggagaggaaccctgccacctctgattagcaacttctcaggt  
ctatcttgcccttccaatcacccatgtgtagctccaccgcacgagtcagacctgtacgggctttccac  
aggcttgaggcagactctttccttattgggcttcaatccggttgctttgctcctctactgagagaaag  
tagtggctcgttgagacctctttagatggccccgagtggtcttcccatgattccgacttcaacgtggat  
gagcccttttgatttggccatggcattgatcagctgtatagatcccaactcctcatctggctcctcctca  
cttagcttgtctgtgagagagtggtggcttttttttttttttttttttttttttttttttttttttttt  
tgcataggaagaatgaagctcacgtggctttagcttgtccctaccttcttttttttttttttttttttttt  
cttatgggtggaagactgacctgagtcattcttctcaccactgtgtcccctttctctctcgccccct  
tttctttttttctgggaaacaaaaatactgaatttgctcgtcactcggctcactacttctggcttatgc  
tttcaggacttgtgcatttccatcgtttactggatcgggtgactacctcatggattgggtctttggcatg  
acagattcttttgataggaacgccaagcgaagaaaggaaagaagtaaggccaagtcaagggaaataaa  
cgggcagtagactaagaatcaaacattatagataatctattctatatagagatatgtaagagatagtag  
ttcatcgggtgatataatagcaggtttcagagagtttaagccagtcacgccaaccagtgaaactcgaag  
aaaggagatagttcagaacgaacaaggtttatagtttaattagttgaaacattattctatctagtttagt  
tagattgggttgctttcgtcctacttccactcagtcgtggatggtagcaatcttgagctaacctgcgctgt  
ccatgtggaccgatgtgcttcatttccacgccttgctgagccgggctggattggtagctttctcgt  
caattcgttagatgatattggtagtgggccccgggctgtttctgtcttctttgtctcggaccaatcccatag  
ttgttgctgctgggctaagagcttgaagttgagttgttctttcgtacgattccctctcgtattggag  
gtaggatctccctttcttctcaatgactccattccatgggtcatattgctgctgagctttagtagcactg  
ttgagcctgacttgcgatgtctagataagtagctcttgagcttgagggttctaaggtccggttgaagcc  
tggggtctataaagggttcaagagagatcctttttataatgtattgggtccattctagcacgtaaagct  
accatatttctcactcaagatattcgactcacttctttttatgctgcatagtaacattcgtagctttct  
catgatactttaataggatcaaatacaataagagatcacaatcattgcaagcctttattatagcgtagcc  
aggcattttgaagactagacatagtagttaagggtggccaggcattgagtaaacatgtagatacttgtga  
ttgttgatttttagattgatgcttctattatattagtcgcccattctataactaatgccaatcagaaagtta  
ataagagtactgatcttgaccagcgtcacctgatgattagcggtgacaaaagctattatagaagaaaag  
acgagctaggccgggcatcataagttaaccggaaatttaataaatcttttagttgtcttttcaaatggattt  
gtctactcgttgaattgggtcgcctcctctgtatggtgggtgaaatacttgtccatgggatgctatttgtg  
attccttgtgattagtgctttagcttatttagactaggccctacctttatagctatgggaacctagcttg  
ttatgctacgggtttttatgggtggatactgggtcctggttaggtcggatttgtacagttgatggggtgctac  
ctaagtgctggacttttacggactggtagccaaccactgatgggtgaaattatgctattatgggtctgac  
ctttagctggccgattgtccaggaaaaagtgattacttcaagcttccgccaccgctatcgtaattaggtt  
tcatgctggcattcagaggcaagctattggatctgacataaatgggtcaatattagctatttcatcgagct  
gactgaaacctatttctagaagttggatctgaatagttacgtgatgtctgggtgaccgattgattacaaa  
tattcgacacaaccgatgtacgtgaatgggttaactactttcgggttcttactatgatatacggatagtt  
aactatataatagatataaattaaggaacgtcatgcttgtcatgcttctctttctgtagtcctccaactaag  
ccgagcaggggtgaagcgaaccagccaatcagtcaggtcggggcaagctaaggcagctacgctaatcaag  
tggagcataagtcacacgaatactgaaactcgaagtcgaagagaaagatcatttagaacgataaggggtga  
aagttaaattgggtgaaacattcagaatatagaagccgggtcgaacaagttgaagagagccaggtcgagg  
gaagggaaatgtgaatcgccattttttggttgatgggattattcttgagtgaggtagcttctctgctt  
tatgctttgactcgagtgactgatggaatgtgatgagctctctttttctcccatgctgggtattggttgat  
tgtccttagttggattgggtccttgcattgcttttcttctcttctgctcgggtgagtgaggcttctaagtaaagg  
aatccatttaccggtaactcttctgcttagcttggtagtacgaatgaggagcctgacttgctaatcccga  
tgtgattgttccctggtaggtttccttgaatctagtgcaattgttaggtgtcaaagctctacattgattat  
tggcttacgcccgttggcttactttctcgggttccctcttagtctaagtcgagtagtctataccacgggca  
tctttatgctgctgagcctagttgggtgtgaatcttgagcctgacttgcataatgctttgctggcgta  
agtgccaaatgtgctgatgggtgggtcctgctatgctgagaagtcggctggaagagtgcaaattgtgttt  
tatgtttcacttgcgggctgagctggatggggaatgttccctgctcgggtcatagttgttggctgct  
cgctgttatggagctgggctattagtttgaagctgggctccttgcgattattttgtcgggctcggaaaa  
gtttttgttcccaactgagttctacctgaggatctttcctggcctccttaaccgatagaatgggactag  
tcaaaggttggcaactacttgcattggccttttcttcttccgtgctttccttaacttcatgcttttct  
gcttagattgctgaaatccaataacaataatagaaggaatgttgaatgaaatagaagatagaatcca  
ataatccaatagaatagaagaatagaagatagtagcatatgcactcttagttcagccctcggatgggat



gaaaggtatgaatatcttgctcgcataaacccgggccttcattgacctggcactactctctaatttgataac  
taaaaaaagtgcttccgctgctgagcaaactttgtagtctgtattcccatcaggcctaaacttttcgact  
aaaagctaaggggctaatactctatgccaccctgagttgacttgagattattggattgtgccgatggctg  
aagtgtcaacttcttttgctgccgaacccgctgctacttagttccctagctagattcagctgtgccaggc  
ctaactccccgatttgtctaatagacaacctatctctgtcaaagccacaacccttccctctgccaagtc  
actccaagtctgcaccaaatccggaatcgagatggagggttaacggctaaagctatgccgaagacaatg  
ctgatgacgaaaacaatgaggcggatttccgactgtgtttgactacaagggataactccacctgatccc  
tcgcttttccactaaatgggcgctcactaacacatagaagggaggctagctacaaagaggtcaaacttg  
cgattgccattctactgcttcccccaatggggatactaccaactcccttatggttagttccattattga  
tgtgacttctttgttttgaagaagcatctcagtcattcttctactcgccttatttgtccaagtatagga  
ataaaaagagaagtttttgtcttctgactaggattgctgttagcctaacttggctctgttcatcgcgacgag  
gagcagcagcggcaacatcacataatcaatcgaatcccacctatctagcatcaaagtaacggagggtagc  
gttttagcccaactcatggaatactacaagagctaccaatgcaaaagaacaaacatggggagcagcaag  
agcaagatgacaagcggagtaagcagcagatggaaagcatcaatgcaaaagcaacagtcgaagaaca  
gcaagggcaactactatcgtccgggcgctaatacaatcgaagaggggacacgcacatctcgagacctac  
ctcgtcgagtcgctcgagagcagtgatcgggagggactgacgaccttcatctggctcctggaatccttca  
atltgaaacgcgaaaggtgccaatctcatcaccgggtgctgcaagcaatagctagaccagggtcgtg  
atagcccaagccaagaagctaagaactggaatactggcatgccctgtgcccttcttctgattggatcct  
gacctgaaatgctcctataaccggaaatagttctcaatggacttgaccactcttgatagtcaccgatg  
caccatgctatagaatgctccttagtgctactggctgataccatagactacattacttttagaaatgac  
tctacgcgagatgactctatactcaaccgataaacagtcacatcattttctctgtgttaagttgatct  
gtgattttctgtaaaaatccttagcaatttctactccctctcctctgttttaggaatgatcgtaggacct  
ctctcttcttctgactaccgatagtggtgctcgggagtttctgctccttggcttaaaagcatacgtact  
tgcttcagaatgcactggagtcctcgtttagaacaaaagttagttagggtcgcgagatgggctgtcatgc  
aaaaccgggtccagggctctcgtccttatatagaagcgtgaatagctctcttccgcccacaaatggtg  
ggaccacgacgctaaagcagacagtgcaagacactaatcctattatgaccagctcatttcagacaagtct  
atcccatgcttccatctgataaagggtaattagtcgatcgttaacaaaagtcaaactcgagtcagcagc  
cacagctcctcggctaatactaaagtccttactttgcatgtcaatcctagagcgaatgaaatgaagttga  
cagagacaagtggtttttcattggctgcttgggcttggatcccggcttgctcctcaatgtggggagttg  
gtcaccattgtttcgtcaccatattgagtgctattatagaatagtggggaattaaagtcagatgccatttc  
cttgacacatttacatctccttagatccttgagatgagcgtcacgatctataccgatcccagcagtagtg  
ggcttatcgagaaatccattccatctcccatagcagaaagttaccaacgcgatttcccttctgtaagacc  
tatattggaattgcaaaagttcatctcctatagttatagtagcaaaacctttaaagcctctttcttccc  
tagaggcaccagagtaagctgggcaagggcacagtgcaagaaaggagaaagcagctgagctatggaagc  
atgagatcctgaaagctatgataaccgtgctagtcgctgatgacgcaattgatatacaaaaggttcttttat  
tgatgctgatgagctggctcaactatgacatttgaatacccttgctctgcaacgacatattggatcgacca  
ctgcatccatagaacacgtgcaatgtatgatcaaaagtaacttccgctcttgggaattggtagaatcaga  
aatgagtgcttcatcacagatctatgattagactaagttagggtaccagtggtgctgcttgcagggcttgc  
caagggcgctacaccgcatgataagtaactcgtaggaaacgcgtgggtacttttgagcgtcagatcctgt  
aggttgataggacttccgtccaactatccaaagaatataatgatagctgaacacatacaagttgacatgg  
tgacacaaagctcttcgctgcttccagtggtcacggatgggcaaggggtctatcatcacatggaaaa  
caatcgagcctaccgctcacagaagcaagtaaatatcatggcacgtcaaggtgctactaaccactttt  
ttagcctaactttaaaaaacagaaaagcgatagcgaatttctagctgcccagatgggtggtatccgtgac  
tgctccgtgaattccgctaagtaaccgagagtgctgctcggcgtacaggtgggagctcttcttcttctt  
gttgaagaagcgaagaggtgaggtttggatttggattggctctcttaggttgttcttccggtccttcttct  
cttctcgaatcaaccgtagagctaggattggaaagagggggaattaggctgctggtaggtgggagaata  
ggcttttctctttagattgaaaaggaaccgacacgtagtagtccggctcgttaaattccagcctttatt  
aagccgctgaaaggtcttcaagaccacatacgtggggaaaataatcaacattataggcaagattgaaa  
tgcaatccattccacttttagtatcctgacctgaaggtgatcaccggaacgatgacactgagcagaaaaac  
ccttttttagggaaacctagcttctcctaacaacttatttcataactttgatagaggaatcattcgaaa  
gttcggattacgaagagcaggcaatattcttttccgactaagcccactagttaagatagcacagctgct  
aaagcaactgccaattcccagaagaagaagcctaactattatattatagaggccctccactctgctag  
ctgtgccactagattaataaagtagagttccgctgcttcttcttttgatgtaggcttccacaggttcc  
actctcatcctttattctcttgatactgatattgatagcttctccttgccttcttctctgtgagtgtagcg

tggaagtctttgatattgtggtcccaatccttttctgtatccgggttcccttaaagggtgccagggaaa  
tattttgaggagggttttcttgaggacctattgaataagctccaatcaatcgtaggcgggtgagcgactt  
cttttctttcttttttgagctctcaaaaaaacccatgacccttcgattgaaagaaagatctccgctctcc  
ttctttcgaagtgttaaactggtcgagtcagcttcgttgctatttatttagtagtctcaaagccaataagg  
tattcaatatcgacgaaattaaattaggaatcttttgggaaaaaggccctttctagagggtgtcaattta  
cgaatttagtgatccaactgggcatcttacatatgggaattcgcccgagagcaccttctactgcatccagt  
actggataggatgacacccaacataaccagaaacggatgatctgattccattcaattggcttagattcaat  
agcagttgatthttgggcaggaatctgcaggtacttttctaaagtaagagattttgcatthtttgcaaca  
agtctttagaataaccttttctttgtacagctttccttgctcgaatatgaggaaaggagagattgaagta  
gctaaagctaaggctttctgctattcaaccttgtaagcaatgtagagttcgtaaggactagtaagaaagg  
aatgccattgatthcgttggaggactgcgthttgcgacctttctttatctatthttatcactthcattctg  
gaggacatthttaattccatccaccagctctatcgctttagatattatctactataagagttggaaagcc  
ttggctaagaagaattgaagtttgcacatatccgcggttcttcaatttgctthctccctcatagagga  
aataggtatactatattcatccgcttattgggactccttcgthttgacctatgcattctgttatcattthcc  
agttggacaacccatgthttacaatttgaggaagaaacgaactctthccattthcattthtttttaggaaag  
caagthcccttcaggcctcagacctggctthcttcttatgatgtagttgtataggaaccagccactacacta  
gagatthtaacataaatggactthccctgggattthattactaaagggtagttctthtgagtcagtggtg  
ttacaacgcataatcagattctgacctgaaaagaaatgtgatcctcgaagcaatgaaagagcatcagtc  
ccatcgccgactthttattthcccttaatcccgthctthtgattcagatttggaagggtgagttagthcaat  
gccacacaactctthgaatttgctgcaaggacaggggcaagggtcgaagaaagcaaataggtthctcta  
tcgcaactctgctctthtactthtagataaagaggattctgctcggaagacagatcagctthctcaacgthc  
ttcaacgthcaagtcagtggtgattagggaaatgaatgtagagtgagaaagthctcgtaaggcgccgthct  
aactthgagctctctccctatgtatggctgatatctccctctgaaaatgctgthctgggctcaagthggga  
atthctthttcaagthcaagthcactthaccgthctcactctctctctctctctctctctctctctctct  
cggggcaagthcaacggatagatggcctgctthctcactthcattthggctthattcgatactgctgaaagga  
acgaaccgaacctgacctgcactthattthcttaagcaaacctccattgactggcgagthattthttatac  
cattthagctcgctthggcctccaaaaagggaattggaaagaaatctctthctctthctctccctagthct  
acctthctthctthctthctthctthctthctthctthctthctthctthctthctthctthctthctth  
atgattgaaatgatcagccaaagagagacctcctgagctgthgcaagthctaaatacataccaatagthtt  
ctcagagagagthcaaaaaatccaggactthcagagthgatcggtgccaggcatcatagthctgggaatc  
tctctthctgcatggctaaaggthgagthgtgctgattthggtccaccagaattthactggccgattthaaagc  
tagthggaaaggggagggatataaataatccaatggthctctctthtagcgtcagthgaaaccaagthcagth  
gatthcaatcagccacgaaaagthaaagaaagggaactthtgagthcgtcaaccactthcggthgaaaggaatg  
ggaatagaccgcatctagthgtthgttacagthgtccctctatcattagaagcacgthaccggcacctcac  
ctattgthcgtctactggcgccattthgtcataaaaaataaaagaaagagcacgcccgaagthcagcaaac  
atgagthcctaactactgthgtaatcaatctctctthaccccatgcatactaaagctthgtatgaaagaa  
aaggggaaggggagaagggcagaagthaaagaaagggaaggggaagthcagthttgtgthcacaacctc  
tctagacaagthgctcgagthgactthcgccctctcctthcagthcagthgtctaaagcacctctcgcaataa  
gthcagthttctctthttataagagthaaataacctgcagaacctctcctctcgtthcactctcgtthcct  
thcctthcagthcagthcctthgtthcctatggacctctcgcaacaagthgthcagthcagthcagthcct  
ctcctthcagthcagthcctthtaacctthtagthcagthgctthggcctctcccaaggataagthctc  
attaatthagthgtgagggthcagthtactggthcggthtgatthcaatattatgactthttttttttca  
aaaatacggaaatthcaaacthgaaagggaaagthttccgcccccgccatthcaacggthcaatthcttaa  
agagthaaagthcaccgthttctcgtcactthttctctthcctthgtggthgacctcgtthgacggaaag  
ctgctthattthagthcagthcaaaaagaaagcacctgthgthgthgthgthgthgthgthgthgthgthgth  
acaactctthctthcctthttgtcagthcaatthctthttttttatagactatctatagctcactcgtc  
ccattagaaagaccaggctatthcgtcgtctcaggagctthgagthgagctthcgtthcaactcgtctga  
aggagactagactthcctthaaaagaaaacctcgtthcgtctcctthcagctcgtthaccgctthgctctthc  
ttattcatgattatacctthcgcaggctthcctggthcaaacgactggctthggggctthgggggtthgctct  
tcgaacgaaagggagthataaggagthcagthctgthgtctthagaaagthggatagggacctthaaagthtac  
thtttgattactthttgtthtagthgcccagagggthgctthtagcaaacgacgaaaaaaagthaaactaagth  
cactcctthcaagthttgctthctthcctggagctthaaagthgtatthggaaaaatthcggthaaagthctthctg  
gctgaaagccgacctactthgctthattgthcagthcatctthgataaacagthgthggthacaactgthcatcg  
gthaaaggggctthgtthgctthcagthacctthctctctgthatagacctgthgctthaaagthcaactthgcaat

aaactgttctagagcgagcaatatccacacactcccatagaaggccaaacttaaagacctgttggtcgaa  
agtcgaacgcttccaagagtgggcacatatctcaatctcaaagaactttgaaagagaaggatctccatca  
atgaaaagaaggtagtatgaacggatgtgctgtaaccaggatccaccagttacgatagaaagtatact  
cattcatagctgcctccccttcaaagacgacatcctgaggaggcaattgaagtcgtttaggcttcaattt  
tctcttcagcatctcaactagaattccctttatgtatggagagaggggactttgtctccagcaatccacc  
actctaaaggtagttgagacgatgacgggggttagaataatattgtcctcaatctagtccatttcttgga  
cacatttgattgaaggtttgcctcaccggaaaccagcacctgaaaggcgcgccacagtatcaaagaa  
caattgtaacgcactcatagtgacagattccaagtgaagaccgaaaagttaatagtgctttaaagaga  
ttggagacaaatccttttgaagcgatttgctcgtacggggcaggaccataactaagagagggggagggaaac  
gtggtaagggtccaagtaatcccgatgatattcttagctatagtaagcatttcaattcaaagaaggatca  
ctaagcacagatttcttctaaagttcctaggggttctctcacagctaaacattctggctttgttgtaag  
tgctttcccgaagggaatcactaagctcatcttctgtgctgattcccaaagagatctatatttagggaa  
caacaactgaaacttatgtctacaagaaacctgtgtgcttgctgaactcattaacttgcttagttcggg  
aagacagacttccattaacttgtttagttacctccggggaagacttcttcttaacgtcagaagtgct  
tcgccagttcccgttgacaacttagcagaaggggctagcgggcaactatgggttctcggggctattcc  
tagtgtaagtttattaataagaaagtaagcttccagttatagcttcatggaaatagtagtataatgccgc  
aaatggctctgctaaagctaatgtccgaaaatcctctgctcatcgaatcgaagaggggcatcaaatagt  
gaaagtgctccccgtagatgctgagaatcttgcaagaaagagcctagttgtactacctgcacacacttg  
cacttttttcgcccggcggattatagtttccgggattattatgtcttctgtctggctgctgtgatcagc  
tctacaatccaagaccctcagagtatcttctgttttatcaatcgttttttactttatccattaagaa  
agaggatcgggttacttgctctttacttttttgatagttcccagggtgatagactattagtttattta  
gcaagaaggatgactctcgattcaatcattagtgggattacggcagttagctctagaatggttttcgc  
ttgagtcagaagcatcggctttgaggaagaggctagatactttatacatattgcgtgggacaccttaac  
tggacactctctatcagtgagagaagagagttgataaacacagctcttggtggcatcaaaggcttgggcacatg  
agccagaagaacatggatctcttagtaaaaagaggattccttgacagaaagaaagtgcaacctcagca  
tctttgaagattgcatatacggcagagctaagagagttagttttgatttagctcaacatgatataaagga  
agaaaagctggattatgttcattcagacctatggggagctcctacagttcctctctcatgtgagtacaa  
agtttgactaatttgctcagttggactgaaagggtagccggaaggaagaatgacagctaaacaacttttag  
tcccaaagaagatgagttgggtgggagtgctgcacaagccagctccaaacaaaactctagatcttct  
ggattcaagtgattcttttccacttgggtgacgacgtttacttagtagtgatggaatctccaaaagga  
gtgtgctcaagagcaagcaggaaggagtagtcagcacaccttcgaagtgaggtgctaagcaagtgaaga  
gaacaggtgaacaggtgaagagcacagaccttgagttctttgattagtgaaatgataagggtagccgag  
ttcaatttatactacggaaatcctatcgggcatacagaccagaaagtaagaagcaggtcttctgggtgagg  
cagcttttcagcccgaacttcttcagctctagcgaagcaacctccttctatagtttatttctggctggc  
ctgtcggagtcctattatgttagatgacaaggagctatataatccctcttcttttccaagaacaacgaca  
tgctcttagatctggaaggctagaagagagagtagtcaacttgggtttgaggatgccagcttggctccgaa  
tcgttatggagtgacgatgttggtgccggataaccgagaaaggacaaggtgttggttctagggtgtgcat  
tgtgctgagggattgggaatactcgtctcttctgtgtgctgatgacagtgaaatgcagatgaagatgaat  
ctgaggattcgttaggcatgattcgttgcatgggtcagggataacagaagaaagtgacacagagctgatt  
catcaggtcgatgtcgaaggcaaagatgttgaagaggaggacagggctatgtgtgaaacctaaagagaa  
ttttattctggaaaatgagaacacagcacagagctacgaagtcttatagagaagctaaagacagacatcg  
aatcagctaaagcttcagacagacctagacacgcagctcaagctgataaggatgctgaaactcaggaacaa  
agaactagacaagattctgaacagtcaataagaagagtgagaaagtaaggcttaggatatacaggcgt  
ctcaatacggaaatgtattcgtcaaaggaaagcagaaggagcaagcatacgtatcagaaagaaaagaagg  
ccacgctgtaattactgattcttactgctacgactattttgacagattggatgcgctctacgggtgacgt  
aatcaagcatggatcaaaaggacagatctatatggggctcacagcagtggtgctaaacacctacagacgga  
gatacaacagagatgcagaaaacctgattacagaactcaagctgtagtgagtgctgagtgccgagtgat  
ttttcgagatgaaggagaactcaaatgcatgtgacaggagtggtgctaagatgagagtagtccctgtttga  
tagtggctgttccagacattgttgggaaatttaccacaatattctttcgtgtgatgaagatgggaattaga  
caataggaatgcaagaaaactctttttatattaggaaagggaaatcgacaacacctaggctcgtctgaccag  
ttctctccactttgttgagatctttcagaacttctcggatccaacgatgtcgtatatacgattgagcggg  
agtgcaaggtcgaattctttgctaagtgaaatagcgtctggttatccatagatataattatcttgcttt  
actcccaactcaagcaagaagttcttcatccacaacatctccttgcaagcttctgtggcagcaattctgc  
ttcagtcgtggacaaaagctgtagttttgattgcccaggaaacagctcctcctgcaaaaggtagttatatacc

ctgaagtttatttctcctagaatctttgtcgtcggcagcacaccacatcggatagcccatcagctcaagct  
tctcattaccaaagcatagacaacttttacgtaaatagtgaggatccatttgcagtctggattggctag  
aaagcgactcacaactgcatagggcgaatctggccttgtaacaccacggcatacagaagactgcctact  
gcagatgcatatgggtagtcttcatttctcctctcatttgttggactttgttccgagcttaatttta  
aatgtccagcaagtaggctttgccttgtgtatattgaatctctccaccaacagatcgttcttaggataa  
caggtttctcgatctatcacgagtgatcttcatcccaatgttttgctggccccactttcatggcaaagca  
cttgttcaaactcttcttagagcgggtatcttgggtgcggtcatggcccacaatcaatcatcgacata  
gcaaaagtatgagaaagtgcgctaacgtacctcttatgaaggcacaatggtcattcatggtttctg  
aactactcatgcctaggcaaaacaagcaagggagtcttaataaggagctctagctacagctccctgagg  
gaggttcccgtgcttactttactaaggagcaaggcagctacgcaacacttcttgcaactcatacctac  
taaaaactgtttactcttttaaggagttagctgcatttccctgagggaggtagctacgcaatcaaagc  
agcagggcagcttcgcaacacctgcttcaacttttgcacattagcaacaagattggatagttgattgtt  
gagaagatagctgcagctcccggaggaaggaagtgaactacagttccagggggagcagcaagggccaa  
taccggctgtgaggcgcgtagcgggaagagatgtatggtaaaggatagctgtttaaccatttgaatgga  
atgggatgttgatcctccttggaaataacgtatataatcagattatcattccagttagagatatcaatt  
aagaaaacactgcaaaaatacgttccgcatgtgcggatcaagtccttttaaggcgatcccgcgaagcag  
gtctacgggtgtccacgattgtatccgactattgagtgaggccaacttcccgattgatagaatcttacgcc  
ccaaattcccctctcttggccttgacgacgcggcggaggctctcttccccaacacagccccgaccct  
tccaacacctcctcgtcggaggattcttttgggctgagggttcttccggaacctggcccattaccgaa  
atctcgggttggagtcttcgatttgaatcgaattcgcctgctcgaggcggcgaattcccctttctgct  
tggaaaagagaaagggcagtatggggggaaatcaagaatgtctttataatgtttccgaacaaagggag  
tattatagactcttggatttcgagaaccgggatctccaaataagggaacggaagcactcctgtttagaag  
tcttccggggagtgtctttaggaatccttatttggaaagaaagggccgcctactctcctcaagaggctt  
ttcgcacttcttgaacgagagggcggacgcgctggacatttccgaaccccgatctagcccggccgaaatg  
gaccgcctagagatcttatttctagggcaaatagagcgtgaccttctcagacggggcgacgaatctctt  
atattaacaatctacttggggatagagatagttcgcggagaaggggaaggggtgctttatttccgggagta  
aagtgataggggttcggtccatgaagacgcgccttccgaaccagctctttataaaccgagaaagctaa  
aaatttgccttctcatcaaaaataaagaagggagtttcaaggtgtaagaatcgattgaagcatccctg  
gacttctattcgatagagtgatcgaatcgggcgctatggacttaaaagcctcgaggggtgtagggcaca  
gggaatcttgaatcaattcccctctttccagtattagacaagcggtttgagtcaagtgccagttacaga  
actaatgttggcaagagtcacaaataagaagtaaacgacttgatctcttctggaaagtgactttgacca  
aatagagtctccttccgatataggggctctcgtagcgttagtgtagtaagggcctctctgctttttttg  
cttctattagcctgagagggcgaatataagaatgcttatacagggcaactattgatctacgctgttagac  
tgccgggctgtaatggattggactatgtgaatacttcttctagggaaagaaggatatacgtatcgggtt  
gaccgctctcttccaggtgtttgcaattcctgtgggaaccgcaccacttgaagcctttgtatccacata  
tgagaagccctcttttagtaaaagcttctcttcatcggcgcacttccgcaatgccttctatcgacaagaa  
tccccctgagttagcagcctgcccacttatctagccggtgtttgctaggtttattgagctacctcact  
actgctttcactggaagcggcttagcttgtgttatgcgtaagacatctagattggcttggcagggtaaga  
gctgcccttgactctctcagttaggagaatgtcatttgtctaggaagacgatctttagcagaggctttc  
gaccagttactgtccgagcagggatcgttgtattgttcttcaaccactcttcagtgacgtagctttac  
ctgcacccttgtgcttcataacatctgaaccatcgtcctaactctaacttataatcctttgggtgctaagaa  
gatttctttcttgactcgcgactctcgaccttactttgttccacctacacagtagccgacctgcccctct  
tactcagcagttagctgctggttattttcaacgtaggcggtaacagatttgaattccaagattcggc  
aggcttagctacctcttccagtgaaagcttctgttccagttgtctctgcagatctgaatgaaagaggtgag  
gtcaactcatccaatagaggtgctcagatggctaaatggattatatgaatgcctattccgcccggctcgg  
atgcccggactgaggaagatgtgtacgaggagcaaaaacgagatttttatacctctctttagtcgagt  
ttgtttcacaacctctcccaacaagtggtcaagttccttgtaccctgtcctccctcaatctccaagaat  
tacctcccacgctaaaaaaaagtagcatttccctggacgtaggttagagtcaaactcttctaataatag  
actggattccatttagatataagtcataatataatataatagagttcagacataatctgaatcgtcca  
cgaggacgaaattgactatatccatcatagaagaaagtggatttgggggggggggagaataagattttc  
ccttcaaaaatggaaaggattctgtcgtagatctcctcgaacaatctatcgaactcgaggtcctcctca  
attgtaggagtttcaacaaataaaaagtcttcaattctgcttctgcaaaagtcggagaatcaggggccc  
ctgattcttctctcgtagccctggctccttcttgggtgaactgcccctcttgggcccgttaggtata  
ccttcttcaaatcgaagtcactaacgcatttttattcctccgcttgaacagagcttctattatggctaa

agaaagaataaaagtccggttctacttataagctaagccaatcgatcgatgcaaagtatgttttgagctgt  
agtgtaggagcactgatctgtacttctggagaagaaaaaatctgtgataaagacagaaggaatccggta  
gactgattaagcggcacctgccgtgagatctagttactactgactgagcactaaccaactgaaactgga  
gcaagtcctcctcctattaggtagtagggggctcaaaggaagatgaacttgctaagccaggcggcatat  
aaacctatcggggggataaagtggatctcctgttacttttggtcgggaagtatgtgatccattaattcaaca  
tcgttttcttggtactttatcgatgcagccagacttgactcttttaggcaaattacgaagcacatggg  
cgcccgacagtgaaatgtgattcaccatctcattatgtttgagctgggttctgggcacataggctg  
ctcatcgctctacctctaaggtgtgctgatctgaggatacttcttctaaagaaaaaggaattctgcctc  
ctcccactgttttaccatctcgcatcttccagcatctctttatccaatcattccacttttggtttct  
gtttctatgcccctcgtctgtttgtcggcgcttcatggaaattccagaggaggatgctgctggat  
cctagctgtttcccgacacattgtcttctggaaaattcttattatattatgcttcttcccacaccac  
ttgaccaccacatcctcatttcttcttcttttttgatcttgagaaaacttcgacggaatcggg  
ctgtcaaagcccagcgaataatgcaacgttcgtgccaccgcttcttttgccccagtaggtaatgactc  
agaactctctgctcctctgcaccatctgaatctgtagttcctcttcgacgtttcaatcgtcaatctgta  
tctactgtctgatatgggtattatcatcttctttttgactacttttcatctgttcatgtccctctac  
ctataagcaggcagcagaactcgcatggtggcgcaaagccatagatgatgagctccaggccctagaatca  
aatcatacttgggtgttccctcaactctcagatagtttgaaatttatcaaaccatgcacttgtttcacaatc  
catatagagatttacgaagacgacaaaacgagagtttttccgcttccctggtagccaggaggagggtgcat  
agcatataaactgtctccttaagatgaccatgaagaaattcattttgaacgtccatctgatgtaagacc  
tatagtgaatggcggaacagccaacggggtacgaacagccaacggggtacgaacagtagtcatttggc  
aacgggagcaaatctttctcataatcgatgccatactcctgcttatagccttgagcaagcagacgagct  
ttatacctatctatactaccatcggatctcagcttgattaagtataaccatttgctaccaataatgaac  
cactcttttttagtctagatctccgccagagttcgcacgactattccatgtttctttgcccggagaagatat  
agagaagacaactagtaacaattacaagtgtcttggccgtaccaactattattattatattccttttct  
tgtgtctgaccagaagtcttccagtagaacttgtcttctcttatttgactccaaccgtcgatggcacia  
ttcttctttccgggcaagcaatcgaactcaatcaagtatcggaaaccacactcgccacagcacctgggta  
tggaatagagctctggagttggcttgaacgagactatttcaaagatccttgttccggatgatgaatagt  
cactcgtcagcctgcccttcccctcacagagcggtaacagaactactgggaagatcaaagaagattccc  
ataacgcgttgacagcagactaagacgcacatctagattggagaagtaagtaggccaatgccatggggtg  
aaaactatcgcctcacaccctaggaatttgggtacgaatcgagaagaattctctcccggaaggctatgaa  
atagaataatgagcactcgtcttttttaattcttccgggttcggctaagacggccgctgtagggactg  
atgtaccatagcttccgttataccttcttcaaccctatgagaagcatctagatatgtactttccctatgat  
cactcaatcgtccaagtgtgaggggcacagtgccaggataaaaaggaaaagggtggataacgagaccag  
actttgatgtaatgtaattcactgccttattgagataggggcatttcaagatgagagagagtgagaaga  
cctgctttcctcctcgtatcgagcatcgctctgagtaaggcttgggaaatcgatatcccggttccgatgt  
agcattggatcaagtagcaactagtaaggaatccaagggtttctgtacatcaagaggaatctttctatcca  
gtttcgttcatcaagagcttagcaagcatatcagacgcggtagataactcactaggggtttgcaagaagca  
aatcactctttcttctcacttcagtagcaatagattgatcttcttttaggattctgcactatcatgga  
agtgagccgagaaaagtaagggttcgacatcgggtgggtgactgggttgccctgaaacagcctcatactta  
gaaagaatatcgccagatttgagcagctagtgggatccatcttgcaagaagtgatctgcaaaagag  
gagatgggtgatacgggggctgtgtttgatactctaataaccaggcaaactccttgttctgagctctt  
cgacataatcctgagagcactcctgacataggataaaagaggtatgggaaaagtgatctccttgacgaa  
gacctcgagatggggtgactaaaccttgaggggctccattgataatgaataggagatagaagtgacacac  
tcataaccattcaatccattgattatggaagccaaagcaagtcaaaacttatcttagaaagccccatt  
cgatgcgatcgtatgctttgctcatatctgttttcacagccatggaaccttaacagtagctttcgatat  
tcttaagtaatggagtgctcatgggtgatcagatattatcagagatcactctaccggaaacaaaagca  
gactgattctctgaaataatcaaaggcagatacgggtggaggccttcgttaacatctttgctacaatct  
tgtagtaaacattgcatagagcaataggctcgataatctgagactttcttcggagctctcacttttgggat  
taacaaaatagagtttcgtaaccggaggaggaaaggaggccgaggtgaagaattctttgatcttcttt  
gaaatttctgggtccaatgatatcccagtatttatggtagaacttggcggaaaaccatcggggctggag  
ccttatttgaattgagaggactgctgccttaatctcttcatcactaggagaagccgtgagggctgagttc  
atctcatcagaaatgcaaggagaaagagcttccaggacgagttggaaattacccgaagctctcgcctgga  
agatgtcattaaagtatgaggagatgagcttccgtatttgagcttcttgacttcaactccgttttcatcc  
tccaacacagtgaaatctgtttatcgttcttcttctcttctgttactgcgtaaaagtatccgggtgctcctgt

ccccaccaacggaactcgacttaaagtagaggaagagatattatataatgacagaagcagcagcccagct  
agccgatcactcggactcatggcctcctaacgactacaccatcccagagtcctacgctctctacagggga  
atcgagaccaaaaggggttccctccagatcctacgctcgtagttgatttctcgccttgggtagtggtgccag  
acgaagacaaggtcgctttctcatatcttgtcgagttacagcaaaaaataaggaagagtggtattaccgca  
ggcttttcaaaaacaaataacttcaagagatatcggctaaacgaaaaggggatttgtgctttcctcttaaag  
taggggttggaccaagaagataggtcacaagtggtccttactctctttgtttcgggaatgaggatgggaagc  
acagaatcaagtttgctactagaaaggaaagaaagagaggggagacagagaaaggattccactttagctgg  
tagcttccctcgtaaaagggaaaccagagtcacaagggaaacttccctctttatataagcagaggatttgatgaa  
atcccattttccttcgtaagaggactgtaggaatccaaaacttgctctttatataaccgacaaaagtaaga  
aaccacattttcccttcgtaagaccacatttgggaatcaaaaaagccttctccacatggtgaaaagtaagaa  
accacattttcccttcgtaagacaaatcttttttggaaaaatgccttctcagcatggtgaaaagtaagcaa  
atctaggaatagagctgggtgtgctctacgagaaggcacaatgtgttacatcttgagatatttgtttagg  
gcaaacgggtcaccgcatcttctcgtatgaaaggctggactgtcgcaatcaaactctccgctgcccggatc  
atcccctgtagctagctttgatataagagtcctttcttggttcggtgggaatgtgcatgatgagaaaa  
ggtagttagcttatctgccttgcttctttgcttgcatgaagaaagactctcctctggtttgtttgtggga  
ataggcatgactaagccagttagtttccctacggcgagctcgagcagctttgtattgcgctgatatctttc  
catgacatgccccgctatctatggttactggaaaccgggcttaaggtgaagggccgctctctaagaaaa  
gaagtttgggggaagaagagctcttgcaatggattcctcagtaggaatgcaaaagaagaaagaaagagc  
agtgttttctaataagtcgtagggagtcggggtcctaaggatccctttagtcgactaactgacgttcccttat  
atctcataggtagcgcgaagggtagctcttttgggcagttgctaatagtgatgggttctagttccatgg  
atggataggaactaagctaagtcgtaagtaagcagggatttatactttcttttatcagaagattgcag  
cgtagttccgaatctgatctcttaccttccgtagttcatcccttttgccaacacagggctacgcttgtt  
tacaacacacccttgtagaagtgctaaattggctatccttttcaggagagttcctttgatctgatcccag  
cacagaggatagaacacagataagtaagtaagtaagtaagtaagtaagtaagtaagtaagtaagtaagta  
gggtgggttagcagcactcctgggaaggggtaaacgactccttagggctcttcgcccgcgttatactata  
gtggcacccaattgatttttagcagagatagggaccaatcttcatccacgggtgtgtgctggaatgtgtg  
caatactagtttatcgggctgcttcgctaggagtatagagataacagtttaggaaggaataaccagcact  
gcgctagagaaagcagaggaataaccgagaagtagagagaacttgcttcgctaggaaaggaaaagggagag  
tggtttcaccttccctataagaactaaggtttaccaaacctccctagccatctatgaaactatgatactt  
tatacttccaaacctgaaaaggaaaaggaagactaaagcatgggactaaagctgaggaggagctagtggga  
actgtctacccaagaattagaacaaaagctgctcacagtacacctttgtttaactgtacgagcgagaata  
ccagctaatcatgtaactgccagaataaggattctaaaggaaagagtttaggtgtgccagagatcctggg  
attacctttggagaggaaagctcctactattactattaaggagcactcaaagctgcttcgctaggacagg  
acagcacagaagagtagatagcttgccttcgctaggagtggtgctaacttattctcataggcgtaccgct  
agaagaagctaccttccctcaaactcctctgcgcaaccagccataccagagagtgctatcacaaggaaat  
tgtctggtctcagaagatgagagcttcttttttagcagaggtactgatgtcaggagagtttgagggaaag  
atggattctgaaggaaatcggctgacctatcggatgaagcagactgctgcgaaaagtggtgccacgagtcg  
agaactcttagaattgtgctcgttcaggccctttagtgcacctaagtgcaagctgggtgctgcaagggag  
gatgtgggagggagagcggtcagtcctctacctctcgtatcgatcccttttgctcctttctagctatc  
gactctatccctttttctttctagctatctcttctccgtaaggacctttttgttccccccacgctgat  
caacaaccattgagataggatagagccaatgcaggaggtgaccgaagtagctcaataaaagaatgaagaa  
attgggaatggtaattcgagcaatgaaaagaaagaaagagttcgcccaatcgtatagctttttccttcaa  
atgcccccttggaaagagaggaagagaaaggagtggtgatggcttaaagaaccacggtgcataagccggaa  
gcacagaatacttgggatatactaaagactaattaaatcttttctcttaaaaaaacgggtaataagaaaa  
acttattatctttttatttgaagcaacaaaagattgagttcaaaaagaaaataccggagaaaaggtga  
tgcaaacaggaaacctgcttcgcccgttgatgggtccaagcccaagtatctatccttaaggagctggacg  
tattgttcagcttccctatgaagctaggctggcacttaggaagattggacgaggggtggaaggggacatct  
ggtggtatcgtatataagagagagcttcttttaagaatgattcagatgaaaaggatgccacaatgctat  
ccgagttcacaggtgtcgttccgtctacttttctttccaaactttttctaaagtgcgaaataaacctatc  
aattggtagagtacaagatcgaaaagaaccctataggcaggctaacagcacggagataacctcaatctcc  
gttagttccgcttcggcctcatggatcaacttattgctgatttcgcttctaggatgggtttggctctgcc  
tgtacttttattcttgtagccgttaggtctggccaaatgatccatcaataaataagtatataatggaaa  
taatcctgactgatgtagcgcgagatgcgcttcaagaaaaaatcgtgtcccaactctcaattctggtgag  
agtatatagggataactaactagtgagagtgtagccttacctttatccggagtaaatctccaagaagtc

gccgctcgtagtttttttaacaacgagagcattccatggttttttcatctattttagacctgtcaatcag  
ggcacgaaaaaaaaaccactttgccacaagctctggagttagtgctttcgttcagttcataaggtagact  
tttttttctaaagcggatctctccttgccctctaatacctcaaataatgattactcggctgttcgc  
ccaactgggtatcgttatcaattgtaacttatggaaatgacgctattggtgacgacaaacttttctggctc  
ttcataactttctttggtatgactttcacctttcgtaccttctcgcgctacttcaaaaaaccgatcattt  
ggactttctattttttttatgtttaatagcctttctccttctttgggcagcccgaatccataaaat  
ccttttctcatttgcttttgagatggttatagcttctcatggcaggggtgttctgttttatggttc  
ggggaattgctgcccacggatcagattccgatgtgggtgaggcaagtggggtcgtaaacctgctacag  
ggcgagcggtagtggggggaacggctggactgagtctgctgcaaataatgatccggcaagggaagtttcct  
cgccccctttcctccgcaacttacacatcccgtgccctttcctgccgaacctggctctccggaccgggt  
tctccccctcccccatagcctcgttctactcccgaatagaaagggtgagtccttacacgcccgaata  
tagaattggcggaggatctacaacggatccaggaaatggaacgtaacctggagaacgagaggtctcccta  
ccgtgggcgggaactagccgcccgcacgatgggaggtgctgagctggagggaaaagtgccgcaat  
cgcgctgggatattggtacgagatgctcaactcgacataatggaggcaggggcttgatcaggaattagtaa  
ggcaacaggagaatgagtcgacctcgaagaaagaaggtttcagctctcattcaaccaactctcttttga  
agcagatagttcacgagataatgagtaagttaagatagatgtaacaatttgaaccaaaggccttaatt  
attccttttttttctaaagcggatctctccttgccctctaattaaatttcatcacattaggaatcct  
caatcagtaagaaagaaaagtgttaagcaaagactggagaggccccgggtcgagatgtagtaagtaggt  
ctccaatactgggagactgaggagaatgggagttgtgggttgagggtggcatgctcccaggccctat  
tttttttagataggtagggtaatgcatttcagatgaatttgatctagcagtgtaaacctgagatttca  
agagttggagactaaaagagtcgtgaagcagctcggaaagaaagaggcgaatctacaagagctgat  
ttatatgttaacgggcggagattaagaggtgggcaagtggtaggctccggagaatagaatgcaatggag  
gacctaacgcctagtaagacggggaaggagtgatgaaaggagggaagaggaaaagctactcttgagcc  
tccttgctcaaacctgccttctcgggaactaatggatgtctatccggtcgggtctatctccagacttg  
ccagagagtaaaatattgcgttttcgcacagtaaggcactttagactttgatctccgctaaatctcaaga  
taaaatgtctcctctaagcaagcaatagccagagctctgaagctgaagtgagccaagctcaacaatcttg  
aatggcttactcactcaagcagtaaggcactccgcgggtcaatcagaggttccatgcaaagcccagc  
tatgaagcgaataaagagcagttcgcactctcgggtgggatgggtcgggtcgggtcaatgaaatgccttt  
ccaagcagatcaggcttcagggtagcttctgggagtgctctacgagaaggcatatgtgttacatcttga  
gatattgttttagggcaaacgggtcaccgccatttctcgtatgaaaggctggactgtcgcaatcaactct  
ccgctgcccgatcatctctatcaaccgtctcggccgcaccttctccgcatctgtctcaactgctcct  
gtgcccgactctggatacctataaagctcctctgggcaatcgtattgggtccaatcagcatcctaact  
ccgcttctcctgagcgtctggactgcaactgagtgccctggactgaaaggattctcttccgcatcttaga  
cttcccgtggtagcatagcatagtagtgcaagtgaaagttaataatcaaagacggttgaaaaaaaaacct  
tgtgatcagatgtgggaccttagataacaaagtagcagatagggcgcctaattctgggtcatttagagcat  
tctcttgattcactcagaaattaccctttctctgacttgcactaacctaaaagaaaaatccagataaaa  
atcccagcggggaaccaccaagtgcagctaaagcagggccgctaggtccgaagagtaactgcccttctg  
acttccctgtccgggatctctcactgaatgtggaggcgcgtagcctacgcgctctgcatggtgagatg  
ggaacaagttgtcatgatgtatgcaggttaagtgagcagatgaacgctgtctctggtgctgcatgtgctgt  
ttgtttgtttccgaggtggtgtggtctgccccgaggaatgtctaggagaagggttttctgctgtgattg  
caccaagtgcagctgcgggttagtatcttctcctaggtgggaaggggcacgacgaggaacgaagtcaaac  
cataccacgtactcacaccattgttcatacaatgtctataagcgggtgttttctgcatatgtgcttctgg  
ctctccacaaaggaacatctccaagggagggggcgtgagctgcttaagcttcatcccatccgaatcctt  
gcaattaacacaccacgaagataggactgagaggttaactccttccaatccaccactcgagtggtaacc  
gatcaggaccgactaaaagcttactagataacgcctgaatccgactaaaacgcccgggataggccttagt  
gtagtgtccatttgtcctagcacgcggtatccagcttatttaaccttaacaagtcttaggacttaact  
tgtacttataggccaactgctgagtaccaacgaggaagttagctctcaagcacagctttcgcagatactgg  
ggataagtccttcgacatattcttaaccagaaccgcttggcgaactcaagacaaccgctctcagataca  
atagacttggcatcagatatatctacttgcaaagcatcaagtagagaacggtagctccttagccacactac  
gatcggcaatgacgatgtcatcacctaacaaagcgtagtcgagaaatgggtctcgtctgatgaggatgct  
tcgtaatgctgccaaccacacaatagcatggtgggacaacgcgaatagagcccaggagccgtaataacc  
aaaggttgacctgcaacaaacacaacttcgtcatgccgtccagtaacggacttcaaagagcatgagttga  
gtgctaaggcaccattgacaatgcacgatgccatcgtttgaccgaaaaggcagccataagctcatatat  
gactggaacgggcccacgatcgggtggcagcgtcaagtcaaaacttgctataaatcttgggcgtctcttt

gccagacgatggataggaccttcttgatggaaggtaccgtcttgtggaatacgcctcagaacagacatac  
cccacacatgacacgggtataacagacgttggttaaaccagttaccgattacaaacaaacgcccgtttcc  
ggccaccctctaaggactgagccaaacgtccggaataaagaggttgagaagaacgggtcgaagcccatggc  
gagggaaatcaaacaccaagccaggccaagcctcataaaacctcaacccttcattagctgccaggtacta  
aattgcgtatcaaacgggtacaaagtatacccaggttgaaagagaatacctggactgaaaaatccatccg  
gttctgaatgaatgattcgcagctggcgggcaaaagccgcgatttccaagaacatcgcagagaagaaca  
agtctccttccggttcttaggagcaggctgctcatctacctgtaacctttttagaacacatgtgcaactg  
aagattcgggttccggcggacgcagttttttgagcttacgctcttcacgaagtgcctccgtgcttcacgg  
cgcgcttccctcctcctcagggtccggttgatcttatgttgaacaagggtacttaaatcattaggggtgg  
actccaggacgggacaaactgaaatcccttttctaaggggattgagttcaccagggggagatagcgtct  
gaacaaattttctacattttggttaagttcagaacacacctctttaaccgaccataatctttaatggga  
gtcacaatgggtacggaatgtgctagcctttataggcttcgccaatttaataatccgacacactgagaacc  
aagaaagatacaaatcggaccaactgatctgcccgatcatccgcactttgatcaattggcgggtgatgggt  
agggatcttagttggatcccaagcaagccaggaaggcagctgcgcgcctacgggtcctttgctgtgttaa  
gcatgtgttgctgagctaaccatgtcaacagtatggaaccccgcctcgtagagaccttaaaaagaatacaa  
gcaagtgtagctcactctcccgaaggagcttagcaacagtagttagttagaaacagcagccgaggatca  
gtcggagaagtcggttctaccatctcaatcggacaataaattccgagaccttcaaacagcgtattctcg  
gcacgaaccaggcccgcctgggagagtcaactttctgatttccgaattgatggaaaaaactccttttgg  
gccagagacaggtacggaaaattctcaggggcccgaagcgcgaagtaggagaggtcagagtcaatatctcg  
tccgatactcgtcctatcctttcttaaaagtgaaacggcgttaccgtcattgaaaaataagcgaacagg  
gaacggcgggagaaagactcggcattcaggccatgctagtagcagtttggtttcttagctacacttgcttc  
catcaagcttccatcaagagctccaagggccactgattcggagtagccgctcgtggcagagattttaa  
ttccagttggacttggccaaatgccaatcctcctagttgacaggggtcacaatcttccaaattttaaagc  
aaataaaaaaaagtcggagctggtaacgccttggtgagcaaatcggcaggttggtcttttagtagagatgt  
gttcggttgtaatgagttgtcttgaaccgcatcacgcacctgatgacaatcagattcaatgtgcttcgt  
gcgctccatgaaacacaggattggcagcaatatcatagcagacttgctatcacaaaatcacttcattgg  
ttcgtcatgtttgataccaaacgagagaagtaactccttgaaccatttaagctcgcacaaagcaaacgcc  
atagatctatactcggcttcggcgggaagacctgacactgttggttggtttcctagtttccaagagatcg  
gagaactaccaagatagaaccgttcaagcaggacttgcttgcttcgcctggttgattacctctctcctttc  
agtcgagttatttcaacctctcctgaagcgtctattcagatatagatatcacagattcgcatacgaag  
attggaatgaccggataactgcccaaagcactactaaatgggtgtcaaagaagtctcaatcacagacctt  
ttccatttttaggtgaacgaggggtaccggctctacgacctgcagactggacgtctatttaactatccc  
gcttttgtctaagaaagtaagatacctatgcgggatcattatgaacaggttacgagggcctgaagcggaa  
cggctattgaaactgtcggggggacttggtcaatcaaagacactagtcggtaaaccccgatctcttacagg  
cactggaattggacgatatagtggcggctatgcatcccaggaaaaatttgggtactggcatccttgcttc  
tgtcccgttgctctgatagctatgccccgcctctcttttgtctctgtgactcgagaagcaggtctc  
gatctcaaaagggacttgtattaaaaaaatcgagatctttcaggtgctcccagatctggagcaggcgat  
ggctcttgaaatgggctagggatgcttagaaaaggtgaataattaggctattctgctgctggtcatggaa  
aaaaaatggatgaaactgaagggctgcttcgacgctcccgacctcaactccgaattatgctatgcctt  
tcttttcggggagcttccgcccggctcagatgctttctttgccacggatgccttcgggttgaggtcagggg  
cttttttttccggctgggtggctgtgatgctaggctaaatgctgttagtgagactcggtaaacccggctc  
attgtaggtgctacttctgtctttttgccccatttctctgtgattggctttagaaccgggaaaaaaga  
gtcaacaacaatcaatcagttatgcctctcctcttccctgcctctctagctggcttgatcttagactccgc  
taccagagaagagcccttggtgccttagctaatggatgcctcttccattagtgctccttccctcggctc  
aactcaaactttgactttgctatgcttgctttggttagtatagcaaagtttctaaagctgttagcgcgtag  
tctgtctgctctaaaggaagtcgatttatgattcgtccttctcggatcgtcgtcggctcctttttattg  
ggctctcatgccggctagacgataagatcaaagtaaccgccttaatttaaccaacctactctgtaata  
ctgttttaccaccgggttgccatgattcataagcaggaatcgtagatcttatctaggatggtgcccgtca  
tctataagatgaagaagtcaagcacatttctcttctcctaagaagtaaggctgacgggctaataagtc  
cccggagcttcaaacaggccttttcatgctccgcagagggccaatgaacttccgaaagcttcttctgatt  
gagtgaacataccgagctacttaaaagtagggcattggatgggacaagccgcttcttactttaagccga  
gaggggtcgtcgtcaatccttagggcgccttcttccacttctacctcttagtcgactaactcaagttc  
ctaaacgagacagcagctaccccgttgctgtaaaggaaggagttcttggtccggtgacgctcgtctaac  
taatacatagttctgaaatagggttaatatggattgaatcatcataatgatgacagctgctaccttccc



attagaaaccatctatctttcttcttttcttctgtaacgaaatctttgctaacttgactgtgttcgacggct  
gatgaccccaatgtgtgaaatatccacctccatggggatgcgcgaccgggaacctgtgtcaggaactg  
agcactttcttgaaagcattgatgttggttaagactagaagaggagattgctctttcgaagctagtcaag  
cgattaaacaaagtaataaacctttcgagttcttgatttacggctagaaagaaggactagagcttcatac  
cttccggctgttcttcaagatggaaaataattgatctgtaaaggtcagctacctacgcctccgctaaag  
aaaggaagaaccgggtagctatacgttccaaacagctaaagatattagttatgcttttagcaacagctccgt  
tcagggagggcggggatgaacacaccaaaccggcaagctacaaagaaggggtaaacaaagctacaaaacaga  
tctgactcctacctaaagggcatagaacaaaagagaggtcaagtc aaagataagagtttagttatgctggg  
cagttgtcttggaggagcagccgccacagatgaaggagttgcttgaggaagatgcttatttatttcata  
agacctacctcatggcttgccactcttacgaccaacatgggattgatttcataacctggagcaacttgacc  
taatctgtctccttctaattagaaaaggaggtcccgtcaagcacgaggaactgagaaggcaggtgcaaggg  
ctttgatagagagggaaagcagactcgacaaccacagcccagttaactatttgaatcaggagcttccgat  
ctcatcccttcaatcaccggtactcgatccgaacttgaaccattctcttgctacttttcttcttcaaaa  
aaaagattggaagtggaaccgat tcccgggaagaggtcttcggcttgctctgatatagataagaaagttcg  
ctccctctccctgtcaacatacatgggattgagcagccccctatctcagagggtttaccccatggccagt  
ttgcatgaaagaaacttcagaatgcagcccacatagtcctatcaacatacaaggcttttcaatccagtg  
aaagacaggtcgaaaacttccatatctgataggctgcaaaggtagaagaaagtatagtgggcatgggtta  
gaaggtagggtacctgctcgtaagaggcagcttaacttagtttagaggaatgctcatcagaaggataagca  
aggtttgatgaattctcctaggtaaagaggtctctgcactaccactagtagtaaacttcagagaccact  
actgggcaagtaaaaaagaattaattatgccgacgatctgatctgagttgggtctagtagcgccctggtagc  
cattctgggtatcgagaggttcttgggaggaagattgtctagacttggagtggtctaccactaaggttaac  
cagataagagagtcctcacctaacaagcaagtgctaataagctaacagtaataaggaattcaagtaagtaag  
actccactattaactggaaacaaggaatgaccagcttcagagggatccagcacagattactattcaacca  
gttgataacagataacaaggaatagcccggtcaggcaacttctccctctgtgcagcatttgcttcgac  
agattgagggggctcgtagatcaggcaacagcagataaatctattgaatgtccatcagccgtaaaagaagg  
gcagggcaccaccaggggctcatcttcaactatagggaaaagaagaacaagaaagactgtaagacagaaa  
cggaaagagtatgcgcgactaggttgagaatctctgcgaggcagcacaccggtaagatagtttaagaa  
tttagctcagtggtgctgcacatcaatgatcttcttattggaaagctgaagatcaaggccacatgttcgggt  
ggtcaactcctccaagtagccctaacgaagtaacccttcaggggcaacggagtagccctggcgtagcaa  
ccccctggggctgaggggtgaggggatctgtcatacgtggaagaagaagaacaataaagactcggaaac  
cgtagtgaccttcggaactgtgagtgaccttcgctcgagatgcagatgaactcggaagacttgcttcgc  
tagcaccgatgggataaatcttcataatggaggagaaggaagactgaggaactgcacatgcggcgtcctt  
gcgaagtaaccaccaacggagtagtcctcactgggattgaggggttcggcttggtgctgcttcgccatga  
gtatgaagagttgcttcgctttttaaaccgatatgtgaacccaaggggtgtgctagatgatgaggggtga  
ggggatgggggttctgcaactctatggaaaatgtacttttgtaatagtcaaacatttcaattctaaaaatt  
tgatagagttgggtgatattgagtgagggaagtagcggctaggaccttggccaagtgaaggatcaaccaa  
agtcgacgagttgggttatgattattgggttttcgaagagaggggtttttgtaatcatgagttgggtggtcg  
atcgtcagtagattctgagttgagatgggtttggatacaagataaggatcaagcaataaggcgacattaa  
actgtcatgtaatcatcatcgatttcacgagtaaggtatagaaaagcaaaattatgagtcgagtacagct  
tggaccttcaacactagtcgacattcaactggcatttaatcttggacgaattcaattccaactaattcgg  
tagaatctagaatagtgagatggaagaccctctccttatcagtttcttatggaccttcgactagatcac  
acgagctactcccacctgttcaactgtgtgatattgtcgttttcgagattcgggttcttcttttttctt  
gatccgaggttaaggtgcttttttgatcgatcaacaggtaatatagaaggatgagggctgtgatttaccta  
gtgaatcaacaagatcgaaacacaccaatcgatcaaatcatttttgaaaaacttgtaacatcgtctgatgt  
agccttttgcttcgcatattcaagtttgggtttttgcttcgcatattcaactatgcctatatgagaga  
ttgagttcacgacaatcaattccaagtaatcatgtcagtagaattgagaaagatgagttgagatggatc  
tccctcggacaagtaccaagcaagatccactgtcatgtaattgatttcactaatatagaagaaaccaaat  
tatgtcaatagaatcgagaaagatgagtgaggtatcgagttgagcttgatcactcctctccttatcagt  
ctccttctctagcgcagcaaaagcagcccgaagcacttcttcttctctagcgcagcagataggtcgc  
ccatacccttggccattgggtgtgctgcttcatctcctagcgaagcaagtggttctctttgggtccgta  
gtccttttactctgaatgatattaggttggat tttacttaaaggctgttcgaaaaaagagagacttcta  
ggctcgcaataaagctaaaggtcctgatcgagcaactagtcgtcctatctatccacctctccataataata  
ggatccaccaattctctcgcgagagctactgtacccgaacagtagaaggggtgggttaattatgggtgctca  
ctgatataattaggaacaatgtccagaactggcactcctggcagaacgtcgttatctgcagaattcgtgga

actggcaaaaagtagattcagatttctctgtcgtcgcatagcttatccccattttttccaagaaaaaggg  
ggcatagagatttcttctcttatgagattgatagttgatcccgtaagcagtcctcttcttatatacgt  
ttattggctgctgcacttctgtcactgactcagtagaggaggcaaagacaaacggattgaagccaataa  
ggaaagagtctgcctcaagcctgtggaaaagcccgtacaaggtctgactcgtgcggtggagctacacatg  
ggtgatttggaaagggcaagatagacctgaaaggggtcacctgtatccgtatccgtcctgaaaagcgcct  
tcatacttttgcgaggacagaactcaaatgaaatcgaaaagctaggaccaaactcttgattagggatcat  
catccgcttttaagctcgacaacggcagaatacgtattggaaacctttcccatagaaaggcttgaagacc  
tccaaactcaagtattcccaaggtgcacactcaatgcaaggttcaagcagacaaatgataggaagcact  
ttcactcgattgcattgggtctaaaatgctagcttgaaaaggaagtccttacactagtccaattcttttt  
tggttatttagcaagcttgaagaacattttctcgatcttcaactggccggatgtggatggaacgt  
atgctacgagtgtcttagttgacgactgggtaccggttgatcttaagttgattcaacaacagcctaagt  
ttccttatttcatcaaatttcctgttagcaggatcgggtaggatagtgagtgtcaggagaaagaaaagaa  
ttagaagcgtctctcataggtcaccaatttattgactcttgccaggtagcccgatgtctcatcgtaaga  
tgttgggtgagtcttagaccaattggggccaaggaggggttgggttaataaataagattaaaggcagcagc  
agcgcaggcatgtgatgtgaagggatttccagtcctggctagcgtgatagcgtatgaagcccggcaag  
caaggaaggttgaaggggttcaagcccctggctagcgtcaagtaagtaagagatgtcgggtgcttg  
aggtaggatttggaaagtcctaccgagaccggttccctgtcctataaatgtaataagtaagtcggctctgt  
tgtgtgaaaatggtagcgggtgcttcgaaagcgtagatcaatagggcggtgtagcggatacatggc  
taaaacctattattatttgggttgtgtatgtcgggtgaaatgtcccaccaaggccaagtcccacgtgatgt  
gggctttctagatgtcttgttctgtctttagaccgagtttgggtgggtctgcccggatattgggttatac  
gctactctcgaatttcgggggtgaaaagaccggactgttttcccttccctggaacctatgccatcgagaa  
ataaggaaatcatgggttttgataatatcgggggtattaaataaaggaccaatgtttattctcctaaaga  
tgatctctgtcatcgagaaatgtataaataatgggttcgagactcatatataggggttctaagctccc  
tcgaaccccgggatgtgatgaatcccgcctcctgggtcgccaaagagatatgtctatagttgaattcgcgc  
gtaaatccttttgaagtggaatccggaccttgtctatagttgaattcgcgcgtaaatccttttgaagt  
ggaatccggacctttagccgatgagattgagatcatctctgtactgtgggcgaaacctgtgtgggtga  
tatgatataaaaagtcgctgatcgtctagttcaataaaaataaatagtaggtatccggttcaagtgaggc  
gatggactttgaaagggaggtcttctctcagtgctggcttctccgtcgcgctaagataggagcagaggag  
aagtcagttttatataagagagaaagaaagatagaacgaattttggttgctttagatagaccgatgtg  
tttctttcttcatgaataaaaagggcaacgattcgagaataatggttctaataagagggagtgtcttttct  
ctctttgccctacttctgtttcccgtaaatagtagtcgagctgatgggtatccttagctgtattcctatga  
aatggaagggatgcaataaagtccatttttcaatcccgagatactcagatcttaaggggttctcaaac  
gggaaatcttaacagaagaatgtcaatataaacaggatagtagtcttccgaatcctcgatctagtaggta  
ttcctactgtaacactatacagtaaagctccttttaagatcacaaccagcacagaggagtttggttgag  
tgggattaaacgcataatcgtgcatccgagaatgggatgtcaaaccctactttcctcaaatcagaggaa  
tgataagccaggctagtagttctgctaactacggaaggaataagaaggtaaggactcaaccttagctg  
tgatcttttatagcacaccctgatacacgctgggtgtgcttgtgctgcagtttagaatgctgattcctgg  
gtgggtagttcctactcttgttcccttgggttttagcaggatattggttctagcttccgtagttaaccaa  
ctattccctttcagcacactcttggcgtgcgataatagtagcttttaggaatcccacaccaagtga  
cagagttatccgctgatactttccttgttccctaggggtgagcagaagttgggtgactagctactgcttga  
agtcagcacactcctctgcttttccgatgctttgaccagctacttgttttcccaacctgagctaatcctc  
tgtgctgtaatggaggagtgtgctgaataggacaggtaatctacaatcctacaccggacgagttccttgt  
gatagcacaccggaggattagaccgaagtttccctatttagcacactcttacacgtgagcagcatgcaa  
taatagtagtagctctctctgtgctgcccaggggttggcttcttttgactgtagatgaaacttttcaaaa  
aaagattgctctttcccttagaaatgggggtgctaacttttacagctatatgaaatgaaagttggcgatt  
ccttctgccatagtagagctaaagccgctgagcagttcagctctatcataaggtaggaaaggtcgtccc  
tcttctctagcagtcacgcagaaaaagcaggggacgtgttatgggttaccagaaaggggaataaggaaa  
ggaatctacataataaatcctctatcggcacaagaaaagggcaggaatggacatcagagtgaaatggtt  
cgtggtaactcacctctccgatctatctcatctcagatactttacttacgaagccagatcctcttct  
taaccttctctctttcttcttcttctcagcacactactttcttctcttggttgaaagccaacttcagca  
cactcctaccgaagcaagttcccttagctgcccctcctgttctcagctttaagtcctcctgttccggc  
agttcacctcttctgttccgtctaataggtaagatttttcccaacttgccttgattaacgggcatctc  
cggggactagcccgtctctcattaaaaaagagggggattgcccggctcctcttctcatgtggaatcattt  
agatcgtacccccaaagcctgcctccactttcttatgtgaaagagttattctatgaaagaaaatctcgttt

ttcacatatactgtccgatgttactagttgagtgaggctttccctttgttccagttatcttctgggtcatg  
aagggtgtttaaagagtcaagtcttacttatttaagctggaattaaaatcttcttctcttatgatatttta  
tagagtttcggtttcttttatctatctccccattcgaacctgaggtcaagtcttccccgctattctaactc  
taaatacccggtcgcacccttcgcacaacaaatccactttgaggcgtcggctgaaccttcgatcctttagg  
aatgaccagcaacaggaggatgagatgccgaggaattttgggtgctaataccacaggaccaatcccgttg  
tttggggccagccgagaagacagacagcgcactcaggactaggcccgtatccagaacgaatagaaggagat  
aatggcatttttatgctaacaggctgctcaacttttgggaatgagaaccaaaagagaccgattaatctcc  
gcgtactgtctcggatcactcatgggaacgggagtggtggtccctaggaacggcggaaaggaagtagt  
gttcaaccagatacagagtgcggaaccgggggtgatcaaagacatgcccggagtgccaggaatgactata  
agccgatagagtctgttggtgcatgccatgaaccgagatacaatttgactagtgccaggatacaagaagag  
ttgattgcccgaagagggcagcgcctcgcctcaaaacctgtgtggtagcattaccccggtgcaagtgtc  
tcctctttgggttgcgggcttagctggatctgaatcagtgggcggaaatcgaagtgtaaaaggagtgctc  
tactccgaatcaggtggccttgggagctctttagttaggtaacacaaggctcttcaagacctgtttgtg  
ggttccattcctaaaaagattaggtccgtgatggtagtggtggatcgcttttctaagtagctgtgttca  
tagcagcgaacatgcatgcaccgtccatgatgctgcggagtgttcccttaagcatgtggtcaaaatctt  
tggcttgcaccagggatagggctatcattccaccaaaccctagtaaaggaatctttaggttttgggtgccac  
atctgtcagattggagccatcctgcatccaagactttgatcatctagctgaggaaattggtaaatcttat  
ataggctctcgggtgccttcaaaaggaagttcctccactaaatcggaatctgactcacaagtcgaatagt  
cctcagcatggagaaaagcggggcacattggacaatacaccataacttgcttcttcaactcgagttgctcc  
tcacgtacgcatgttctaatagtcgagttgctgttgctaaagcacctatgggtccatccctggtaacttc  
aaccgctgcctaagatccttagaaaagagtgctgataagcggcaggcttttaatcgatctaagaactgt  
gttcggcttctgagtcctcaaatcccaactaaggctaaacaagaattaatcgcttatgaaagagatgaaat  
gcagaatccgttgatcgatccatcaggggctttaccctggcacttcccacttactcctagcagcctttct  
ttcttgccattgaggacgaagatggctatttattagaacaagacctgaagtttacttctattaaagatc  
tgagccttacgagacttcataaagatactgcctatcctgtgcttaccttgggtctgtgctgcttcgcccga  
gctgctaataagatcaagcagtgctgctgggttctcagatttcaactaacctatatcataatcctatattgg  
cgcaaagccgtagatgatgtcaatcaaatcttgcttgggtgttccctcaactctcagaatcaaaccatctcc  
atatactggtagccaggaggagaggatgaaaagaattttattttgaacgtctatctgaaagaccacgggc  
ggaacagccaatggcaacgggagctatcaataacagactcctgcttctagccttgagcaagcaaacagca  
tagaactttatatctatctagactaccattgtcagcttgagagaccagaagctaccacctctcctgatca  
attgacttactatcgcacctctgtctgtgctgcacacatcttcaaccgagcaagccttcttaggggt  
gggactctcctaaagtcctgggggttccgggaatccattaagctcagaactttcattcagatctcctaaagat  
ggacctcccttatactccgaaaagactttcgaagcataaccctactactctgtgctgggcaaacctcca  
atctataagattagcgaaacaaacataaaaagggctcttctcgctcttgtggatgcttccctaatcttagtcc  
cctgtcagtcagggctatccacctcgaattatcctgggtggacctgatagctcctgtaacaaactaacttat  
ttgagcacaccgccttcgcggtggaagaactcaagcatctcttctgcgtagatggaagatcaggctcct  
cctatgtctctatataagatacgttgggaagtagtacgcactaaccaagagaaggagacaggataaacgg  
gagacttcgctgcctcaaccctactacaggatataggggatagcacagaaggatactatctatctccg  
ttgggatttgggaatagatgtatgctgttaaccactcgaatgcagcacacgccgaagtagtaggtat  
gctccttgtatgaccgatccgtaaattaatggcgttcttagtgttctcgcccaagtgagaggaggaataa  
agaataattggatgaagcagcaaggatgacacggatcaacaaaaggcgtgaaagtggacgagtaatcct  
gattctacgatcttcccttgtgctcctacacacaataaagttgtcttgggaaaaagatgactgatcgact  
caatgaatcgccctaacctctgagaaggttggtaataaccagctttttgttttagcgggtgctttgctttta  
ttttgaagagtaagagaatcaaaagaagcaggaagacatgggtattggtacctggggcaagagatatac  
aatcggttgggtcgggagcacactcactcggaaactatctcctccgctaaagagaaggttgagtcacagg  
ttcggatggagccccgagggttagggtaactttagggcatatgaccaagtcgataactcagatctgtca  
acgaagatgtccaccgcctgttaccagaacaattcatctaccaaccagaagggagatcttcccatttt  
ggtatcgggatagcgaagcaacgattatcttcaatcgaaaatcaaggtctggcgaagctctgagggctga  
gggcacaggtgagaaagctcagatgatgaaaaggaccttctttgacattcgagagtcgaaagccctgctg  
ctaagatggctcctaggtgaaataaaggatggagtggtctaattccctgcttttgcatcaattgatttat  
cgaaccttgcgttattctattgaattacttccctgcataatagatcttctcgatagccagatagttgggtg  
gtcgtatatcagctaaagagctaatttttgtgggtttaagtatcccaaacgaagctcactatatgatgat  
cccgttcatccgtttacgtagaggcgtttcttttagcacacccttgatgatccaattctatataatttgg  
ttgagtgctgcatacctcatgacaaagataccaagataggaataagactgacatgacaaagatagga

gatagaaatagactaactatataaacagcttttccctccactcttttgctcgtcatcctcaacccgaatcag  
taaacccttttctactagaaccagaaacgggttgccggctctctgaccccgccgcagcattatgatcaag  
ccattggctccgctgatttttgcattgggatgactaaagaggaatgaggatcctcttgcattctgtac  
tcagggtacactgaacaccacaaaaatatcgatgaaactaactataagtgatgaggatcgaaccgctc  
acagaaggatttacagtcctgcactctaccagagctactacctgttaccactttcttttgtgagagggat  
gcaataactcgactgtgtaagggtccaccaggtccgtaggagagtcaagtctttcttaagcaagctgtttt  
ctggcctatacggaaagagttttcaaggcttttccctttccccgaaggaagttaaagcttgctgtaaag  
ggaagggaagcacagcaataacgcctttttccctttttctcccgattagacgaaagacgtgttgggaata  
gtcctttttcaacaataatggggggccttccctcgcatgatagtagatctgctgattgggttctgtttta  
acagcatagcttccactcccattttactagtttaaaactaacaagaagtctgtgctggggaaccctgagacc  
tagattagcgagaaaaggattccagtagcatcaggttgagttttttctttccgattaccttcttcaga  
taagattcttcattgcacgaacaaacaaagaaatccgttcgttcccttctaaagactaggctttgggggc  
gttcggtagcgatcttatacaagaattgggataaccaccctagcgaactattgcctttgggtcaaaaactt  
ctcaggctgcctgtgaggctgcgttaaccgacgttacaacgttcttttttttacagagtcaaaacaaaa  
cttcaatctttaagcatgggcggtgggtcgaatgaatagaatgtccgagtaaggagaactatccaagcttc  
ttcacaagcgaaggaattgcagcctaaccatctgtgagatcgggacttcgagaggctctgacgcctct  
ttaacgccactctttccgagctcggacatgaagcttacgatgatgttgtagtgagaagctcagtttc  
gctttaagcccgcacaagcgggtgggttgggtgggttgatagaggactcgaatagctttatgtgacc  
gttcccttctttatcgaataggggttccctccgctcacttcaaatttaactagggatgataaccagagaacg  
ctctccactaagactcccgtatgatatgcaggttaaagctcccgtttcagatgctgaaggctcgttgaga  
cctcttatctcataccgcttcgtcctacttcagctaaatggaatctttcgtaaagccatcctgaaagtaa  
ggtagcatatagattcttcgacctcccggctcctaaggaagtaatctcgataggaatgcccgtctacgtca  
gagaaagaagatacttccctcccttttctcgataaaagtatactatttatctgctgctgttctcattttc  
aaaacatcttgagacagatcttgcaatgtgaacagcaattttcagtttgagagagtccttacttgccctt  
gaagggtgatggggtgagtggttcgtggctggcctttctcctcatcaactaatatgcctccggacctc  
tatcttttgaactaaatatgctgaacaagaatagaatgaaactagcctagagcagataaggctcaagcc  
ttcacccttgccatccctagtagcagatccagtcattcagtagcagatcttcgcattcctttgttcaag  
tcaatcaagaggggaaaacttatactatgatggggatattgatgggccttcctatgctgacgaatgcac  
cttcccttctcaagctataagaagtacgtactttcagatggaaaggattgaactctaactcagaagtgg  
aattcacagctattactactatagttgtctttcattaacagttcctcctgtacaagaattgtaagttgat  
tcataaccacgctagtaaagtgcctttggaataggaagttagtccgatctgggtactctcgctaaagt  
ttgttgacattttagtccctcagaatagatttctttactgtagtccccatccgagtaataactctagaat  
ttacttctccccagacccttcaactcttctgtccaagtgtttaattggcttcgacgcctggacttttatct  
ctagatactctttccggcttcatttaccgatcctgcaactatagaatgaccaggattttatcccgtttaa  
ccttccacttccggctagataaattgccaagcccagctgtaactatttagtttacaccctctaccgcagctt  
gacttttcagctatcgaacgtggccttctacgcctgcttgctttttctatttgacatccctatcacctgg  
cggctaaaccatccgttgatgagggaaactattgaagcttctaaagcagccctttccgctgctcctacatc  
tatctaggaaggaagtccactacggatggaggaagttagtcaataaaactgatacagcaggccaatcaaa  
gcaatcatctgccgatttcgtagggtagcgtacgcctttgtcttatgggatttttaaggaagcattgc  
cattattgattaccgggaactcttaaaaaccatcgaatcgagcagcctatttcccgtctcctgctttca  
tagagatcttttctctcgtaccgcccgaattatagttggaaaattggctactttataaggctaaagcaag  
gttttcaatccaaagctttgaagaaagaagaactccgggtggaagggttcaaggattattctgattgcac  
gagagattgccctaccagctaaactcctattgacctactaaaacaaaagcactaagacttatactagcta  
acacagaagagacaccataggaaagggcacacctaaccatttttttttcacaaggttaccctcaccact  
gtcactttgatcaataccttgctttactgtaaaagatccttacacaaaagtttcttccctagaagacactgt  
gctgaaacttatgacacatacctacttccatcaaccacatcttgctatctttcacacgaggggtgagttct  
tgccggctgacgttggtgaacaaagcaagacagctgggtctttctaattcatagatagcccgagaggaag  
tctaagggttcagctcttcccttccctcacttcaagacaagcaccacttttccctatctttatcctgcagt  
ttcaccacaggagcactgcgtctttccctcctatcttgatgaatctactttttaccgggtgctgaggaag  
tgagatacgtagccagatcaaatcaatttccaaggggtattagtttcaactaaagggttccctcgat  
accgatcaaccaaggtcttttaccagctttttgagtagtattctactttacctaccctcacgccttcc  
ctttttctaaagtaggaatggattatcctgtgggtggtgctatctgatgcttcagattcattgaattccct  
ccctcaacttattctgatttcgagggccccctataagataagactttgctatctcttccctccttgtaggt  
tcaagcgaaggctaaacaatgcctatcttggaaatgctctaaaccgtagaatcacaacagcctttctctt

agggcaacaggggaacaaggaaccagggaaagaaccaacacaactttctttacttccctagggcactctac  
ttctttcttcagtttcttttagaaggggaagaaatgagatcgatagcgggaggtgcacaaaggaagtgagc  
gagccatcttctccaatccaataagaaaggagctaatacatctcttgtcttcggtaggtcgtcgcatataa  
caagaagaagggatgggtgggatcttgagttcatgtctgcagctctgaagttgataccatatccaacgag  
aaagaatatgaaagaatatgagacatgaggctagagccaagaagcttctccgtggatgacagctaaattg  
aagctctccagaaaaaagaagaagaaggtcgagtcacactacatcgggctacgtcacaatagttaggaa  
ttgaatgcgctgtgaaagaatcttctccatcaatttggacagatgatctgatattcattttcaactaa  
tgccactaatgacccaaggaaaggaagaactgaacttcaagctagggaaaggaaagctagtaactgatagc  
caaaactaacaggcaagcaagcacaaggaagcaccacggcctcatcaatcgaggaaggaagcatgaa  
aatcgttgaaaaagccttcttgctattgagcgggcttcataggcctttgggtttgggatatttgattgaa  
tcagagaataggttcttacagtgcccgaattggacaaatgaatgaagatggcatgaagccgatagctgc  
ttatccggatccgggcttcttttcttaaggcgggaaggaaaggcaaggcaagtaaatgttcacaaag  
gaaagttcctcttttagtcgagagtgattgaagagttaggtaacagaaaaagatcgaaaagtcccggat  
catcgtctacacttttccgtatggaagtggtggtcttcttttagactcccccgagaagatggatcctctc  
ttatccgatccgtattgctccttagcagagatcgggttatgggtcttggtcttgcaaacctctcctggg  
accggcaaggttaagcaagtgaaactctctctagtgccgcatctaagctatcaaatgagctggtgaatc  
gtatttgatttttttagattgagaaatctccaaacccttatgaatggatcttgctccggctgataaaat  
cttcaactcaaaagatttataccacagcctatgcttactctgcctatctaacagcggggtgaactgcaa  
ataactaaatagcaataggcgcaggtatccgaaactggaattgaccctcgtactggctcccgaataggtg  
gaccctcgaacgggatatgctccgacttggtatcaatcttctcagctgatggctaagcatatgggactc  
catatgagaaactgaaagttaatctgctcttccgctacgagctcaaagtaagtggttcttgaatgaaa  
actcattttggatagctgacttgatcaaatgcaagtaagtaattacttacttacgacataaagctgtc  
cttccaaccagccaaccatattacttatagaaaggttgaacacaacacttacttaggcctgtggtagt  
agctaattggcctagaagtaagtgagtaagacagctcgttagcagatcggaatacaatagaatcccttc  
ttacttacctataaagagtgaccactgaacgataagaacaaagccacttccagctataaccggagtgaa  
atgagttctataggccttagccggaacacttcttaactaactgttagccagtgaaagtgatgctgggagt  
gatcacgaacaaaggattaatagagcgtagcttatagccgagctgtaacaggagttcgagtttgagtga  
ctccaagaactacagggaaatgccatagtatagctaaagccaatagccgtagcagtgaaagctgctcgttcc  
tgtcatttccactactattccttttctttgtccggatggtaataagttgtgatataaccctactgtggg  
gatccattgtaggagtcaccctgttccagcacgaagtacggtagccggctcagctcataacatcttc  
cgagtttgatatacaaaaaggaggataaccggttgatgcatgaatgatgatactgctatcctt  
cctcaacatctctttgggaacatcttcttctcctcgcactaggtcatccctacgaggaacatctatctc  
ctaccccgccgagtaggttaacaaaccctagtaggatctgcttctaataatgcatgcttcgagagttctacgg  
ctgtccataccctatccacccttaccctctcctctaatactatctttctctatctgttgattatgctgag  
attctgctgttgtagataaaaataagaagttgtagccttcatcgggacaagcttcaatccgccttaat  
ggttggtttgcaaaattttgatctcaggggggaaaggaggtgctgctgaaatctatagcaatggccttac  
cgggtgatgcatgctcgtgcttccggcttcaagctgctatgcaagaagtttaacaagtgcgatgacgga  
atttgggtggagttcttgcgaaaacaaaaggaagatctcatggtagcttggcagaaattatgcaaatct  
aaagaagatgatgggtggtttgggttttccggattaggttggttaaccaagctctcttgcaaaacaat  
cttccggattatacaccaaccacatacgtactatctcgcacttctccgtagccgatatttcccacatag  
ctcaatgatggagtgtagtggtgggacaagaccttcatatgcttggagaagtatcattcatggcagagaa  
ctcctctctcgcgggctcctaaggacgattggagacggtatacacacgaaggttgggttagacagatgga  
taatggatgagacacctctacctcactgaattgaaacctatctattgaccttaactctcgtctgacttg  
tacgacatgaataggcagtcgtggaaactggatattggtgcataatatttttccctccacagaatgtggcat  
ttatcatctcgatgataccaggggcaaatcttatggatgataatgtgtgggcttacactaagagtggtc  
gtacacgggtacagagcgggttatagattgctatcacaacaagcaggaatcctgaggaaatcgaggaatg  
gaggaaactggtgcaatgagctaaagaagaagatatggaaagactgaccgcaagatattttctccacg  
atgatcccacttcgatgtgttaagcaaaagcacaatcaagaaaagaagagaagttctcccaatagtt  
gataggatcttcccaccggagaccggcttcgagagccatataaggactactcttggctaagcaactttg  
ggcgggtggtttatcctatttctcacttgaatgaggaaacttcttataaacatattttgatgtgaggatc  
aactactcctactcggtaactgctatccttccctctcatctctcttctcctcgcgtaagccttaaagta  
tccaaattcctcaactaagagtttcaatacgtctcttcttcttctctctctctctctctctctctctct  
atcatcgttgaccaagtgctcagcgcctacagcgcgctatggaccactgaaaggggttgatcgggttag  
gtttaaattggacattggactagagagagagaagagaacaaagtggtggccttccccatctcagagacag

atggagtc aatttattccacacatgcatgggaaaggccccggcccggtgaagcaagttgtagtgaagga  
gttctgaaggttcttaaaggatgcagaacaatactgaaagggaacagacatgattcactttacattcttc  
aaggctctgttgaaacaggagagtctaaccttgcagaaacagctaaggatgagacaaggctttggcacag  
taggcttgcacatatgagcceaagaggaatggagttactggcacaagaaaggttccctagatagcagcaag  
gttccaagtctcaaattttgtgaagattgcatctatggaaagacacatagagtgaatttctctacgggccc  
agcactactaagaatcctctggattatgtgcattcagatttatggggagcaccttcagtcaccattatc  
ttttgaaagtgctcagtattttctaagctcttatagatgacctaacacggaagacctaacaaactaaca  
accggattgagtgacttgatgctacaattgtaaacacctttcccctgggtccgtactgatattagatttct  
tacttctgttccgattaaatgggagatgtctgggtgaagaatctttccttgctaaccaagagatgaactc  
cgcacaccgatagtcctatgagcgttgtgccaacctttcctacctcctttgggagttcacttcagattc  
caacagctacagaagaagaactgcaggaacaaatggactatatgaaatcactcccatattcaagtgtg  
ttggaagtgtgatgtacgcaatgattgggtacaagaccagattacccttatccagtaggagtgattagcag  
atatatgagtaagccattgaggagtcattggcaggctgtgaaatgggtcttaagatacatcaagggaaca  
cacacaagatgtgaagttaacctcaagaagagtgatgagtttgaattgattaaaggctactgaaatcc  
cataggcctctgatcctaactgaataacctttcgtagatcaaggaatggacaaagcagcgttccctctc  
ctcttgtcccgaacgcttagacgagcactatgcttaaaccgggtatgttgctttgccatgggtttctttc  
agctgctcttttggggaggacaagttgaatatatcaaccattcagaagaatctcttttctctgtgaagg  
tgagagaaggactggccttaacaacgaatttcgtaaagcgaagaaggggcttggaaaaagcattcgaag  
gaactcggacatcgcgcggccatcggcgaagatctcccctgatggacatcattacacattcattcaacgc  
ttccccggtttaaggactttagcgtctcattgcccgaagcagaagttctttcattccctaagcactcattg  
tatttgaatttgaccgcctcagaagagctatgtatccggctcttgggagtc aaataagggcatggctaaa  
ccagctccctagcctagggtaggtctcataatagagtaaagtaggacagaaggattagcttagcagtga  
acaaaaatcattcaatcagctcaagagctggaaaaaaaaacttctaggtttcggaaatagaaggaagggggc  
tcccagcaggtaaagtcctgcttgattgctttcaccagggttataaagactgggttcgaaaggaactttct  
ctctgcaaaaggcttctggcaagcttgaacatcgtatcgttagctccttttaaaaggaagacagaaga  
gctggtaggacggactggtaagggatgaaattacttattacttatgagtgaggggcttcgctttttctta  
taactgtcactggaacagaaggcctagtagctccaattggcttaagtgcactccaatgatattctagctct  
tctttcttaagaaaatatagatattatcgtggaaagaaatctatctcttgaagggagtc caacttaattc  
agtttgatcccaagagacgggtatggaacgctcgtatagaacccatccaatagaactaaaaccgctggga  
atgcaacgggatggatgtcaactggtaagaatagccttggctctggagatctttacaacaggagatcagga  
gttagctcgttggacggagagcagcagagaagaaggggagcttaactgaactccactcgtttagaagaa  
gcctcgccagtcaggggggatagggaaaatttcttcacagcatgaagaaaagagaggggatcaaaaagggc  
tggctccttagaagggatttgagtgcttttagactaagaagtgaattagataggcttgtcttaggatttg  
atgcacattcaagggcaactactgcttatgggttaggcacttagtgctacaatggctgtaacagattcaga  
gattgcatttgcccttggatacacaccacacattgattggatttgaagatacgaagggctcataacgga  
caggaactacaactattgatactcggcttagactagggggggggaaggcactgccggaaacgggactgct  
gtactataaagattaaatggggaggacagatatagggcagacacttccaaaaggcagaagcattggctttt  
aggacgactcaaacttccattaaaactccaggtggcaaaacaactccatccaataagaaagaggatgt  
gtaacgccaaataagcgtataagaaaaggactagaactggctgaaagcacttaccactagaagaaattg  
gctgacagaaaaagtc aaatcctctcctctcctttcagtcgagttccctcttttataagagtaataa  
attaccttggacctctcctttcagtcgagtttgtgttcacaacctctcctttcagtcgagtttgtgttca  
caacctctcctttcagtcgagtttgtgttcacaacctctcctttcagtcgagttgctaaagcacctctcc  
tgctttctaaagctaaagggatcccgaagatagtcatttcagtcctgttgggcagcgttttatagaagtg  
acggaagccaaccgactgacttgcagctgccagtgctccgcctgactttcttctcttttactatagatggg  
agtctatattcagcatctaggttactacactgaaagcctaatagtaggctctgcaagcctaattcggattc  
ttttctaacgtcctacctacagggcagataggagctagtttccaaccgccaacaatactttacactta  
gattccaccatagtgctagattaaactaggccttctctccactaaacagattccatcgtagtgatagaag  
tcttagactaagggcagaccgcaagggcaaatcttaggcattgggttccgaggacggtagcctactgaga  
atgaaggaagagaagcagattttgaagactttctaagatattccacgatcaataaccgacttcttatctt  
ttctcttggaaagtcgaacctttatctgtatggaaaagagggcttctacctatacttgggtgagaaagggc  
tgaatggctcaggacaagaaaaagccactaaaaagaactgtaggtcatacagggtagtccactttatctt  
tatccgtgactctgagtacaagatttccgggatcaagaaagtcgcaataaataatgctgggctggactct  
ttctcgtatgcccggaaaacgttgtttcgatagaactcagcttgctgcatagctcgtctaaacaaaaca  
ctccagatccgcacttccctttaataatactccaaagggactaagcttgactaagaagggctttgctccg

catgagacaaagttatcaaaaagtacttattccaatttagataaccctgattagaaacacacttgaccgt  
tttctagcttgaaccagaacaaacattaaacgcccggacaactgttagaatttcgatcgaacaagtatt  
ggcattctgtcagcatttcccccgggcagtgatagttaggaaaggaagaaagaaaggggtgatacacga  
gaagataggtcaggtatataatagcgattgcagatgggtgcaccagtttcgtatacataggccctgggtggg  
aaggtgatgagatcgacacattatagcgatctacgttcataggttctaccttgaagctcttctcctttc  
cttactctaacaagtaagcaaataggaattaccttgtgaagcaacgtaaatttagtgagtttgggaggt  
tagccttaacacatccaaatcttacgaagtcaatgcggtagcagccactgtcccagccttttctgtcact  
cctcctttgaaaggagcttctcgccgttaaactcagctcttttccgggctttaccgattagatcagtt  
tagaccttaccttgggattggttttttcctttaaggctgacccttcttatagaaaactggcatctagaa  
aactggcatccaaaggtctcaaccagggataaatcgacaaatctaggataaagtcacttgaatcgacc  
aaaggggaaggaagtatgaaaatccaattctttgacggaaactaaaggctaacctacaagctagcctcgt  
cgaatcgactcactctcctaacctcaaaggggaatctgagaaacaagtagatcaaggattcccatggtgcc  
tatgggtgtcttgcgaattccttaggaatgttaggaatgggagaaccagtaatcccagtaatcccaggaata  
ggaggttaaggagattagttgggttaggaggggaatcccagcaatattagcaatgaggtgatgagattaggtt  
tgttttgggttagggattagaggaatgggagaggttaagccaagtaaggtaaggagttttgtttgtagaaa  
gttccatttcaatctgcctatctgtttgaatcagtttatccaaggaagtgttttactctttaaattgggt  
agttgggttaaggaatcccaggttaggaaattagattagttgggttctggaatccctggaatgtagcaatg  
ggaagagttcaccttgcctctctccttttagtcgagtaataaatccctctcgcagaaagctcaagtatg  
taacaacctctccttttagtcgagttactaaagtacctctcgcaacaagtactcgagtcacaaaactaa  
aggtcgagtcagacttcgcccctcaggtgggaggagaaactgtacaggacatagctttccgcctctttct  
ttcacaaaaaatgaaactacaaaaactgtagatttatttttgaaaagagttttgtggccttttcaaaa  
aataaagaagtgctactcaaaatgtggcggagctagatccttacggatcgtggattcagagtgccgctcg  
ctttatataaaaccggaaagactttatcgtagaagcgggacttagaaaagtcctaaaatatctttctgacc  
atgggtgccaatagcccatactttcagctcttttttaaaaagacaacgtgaagaggaatagatcaacaaaa  
caaagaaaggacaggaacaggtgggggttcgggggagcatgccggcataatcaaggccgtcgccccttctt  
cgacgggggatgggaggataaatcgggttcttagtcgggtgggtgggtccagttgaagtggaaagtcg  
ctagagaacaaaagatgtaatgaaaagataagcaatagaagtggccaggtcaccggcctagaaaactcg  
cttagacaaagactcaatcaattttccgaaaggaggggtagtaggagtcctttcggaaaggaggagta  
agcttcaagaagatcgaggaataaatcggacaattatgctattccgccccttcttttctacatTTTT  
tattgagccgaatcactatcattattcgataaaagtccgttctcacagcaggaccagtgtaaacaggttc  
taggtcaagcgatcctataggcaagttttaaagtcggtacccccgaaatgaaatagtatccacataaat  
tgtagttattctcctgcattagatattttctagcaatcttaagggttaaggcgagcaatctgtaggtatt  
ctcgcgtgccctttatagcagggttccagtcgaggcttcccctttcgaatgattcagtgctctcttca  
accggcgagtttagccttgtcagtgctctcagaaaccagatcaattaggtctggatcggctcactttccc  
aatcgaaatgaattcgaaacgcgagacacgacactcgcaacacgagaatcaaatcgaggatcaaccctc  
cctatatcatttaagctgttacagagggcggttagctcaattcatagccttccctcgggtagggttaagga  
ccgatcttaaatttccgttctccttacaagagtaagactaggaattttcactaagccaaatctctttca  
agcgactaattctatcctatctattcaaggggtattgcttaggggaagaaagacggaaaagctatct  
gtatatttaattttcatactttttttatttttagtaagatcttatatcatctgttccaagagcgatggaa  
ccataaaaaagggagcccagcggcattaagaatagcttctaaaaggagaactggctaacgaagcctag  
ctcgtttaggtcctgccataatcaagggaaccaagctgctacctttccaggagcaactccttagccagcct  
acctataatccctaccataagctacttctcctggagtggaactctaagctttccctctcgcaataaatgc  
tcgagttccctcttttataagagtaataaattaccttggacctctcctttcagtcgagctagttctttct  
tcccgcctataagctaacaactgtgttcttactttccacttactttcctgcagtccecatcttattagaca  
aagggaaacagaagaaagaaatagatatctttcaatgtggggaatacttaccttagctgtctttactttcc  
ttgtttaaaaggcatccaatccaatgtttcataactatttgtttatggggaatcgattgtaggttagctg  
tccaattgaaagcagtcctcatgctttaaaccaccggcaccagcaattcaatttaaaaaactgctcct  
attatcagctctcagttgcagttgaggttctgtagaagggccggatatacctctccagcaggagatttctt  
cccagctcactcttctccaggcttaaggggcagccaggacatcagaagtaaatcaagacttaacagga  
tcggatatagggttttgcatacaaggcaatcgcgggtgaaaaaagtagtccttccctccagagctgaaata  
gccgggcttattccttcaacagaggtatttccaaccggaccattcaaggaaatagacaagatttaagctc  
cttgcttgggttogggtatcattaaatgtataggtcgggtattgaagtgaagatacttgcataaataga  
aacttcggggcggtagaagagagggcctttctgatacgtcaaaaaagaagccgattctacgcctgaaagg  
aagcatgtgcccaatcactaaccaggaggtgggtgttcatcaagcagttacttttttccaccattcactc

actccacactttctagatatatcgggtctattcaactaccctctttcattggcgaagtcggaataaagaaa  
tattattcaattcaagtagagccttttcaaaaagggttgacacagagatgccccgcttccctaagataggat  
tgagtaggcctggtagaagtataatcccccaatgggcccgcctgaagtaatccgagtagcgaagtgggtct  
cagtgactatgctagaacgaccgggtggcatagtcaggcttagccgaggtgcctatcttctattcaataa  
ctgataggctgtataagaaaataggggtgaggaggggatgcacctatcgatcctggaaatgccaggggct  
tgaggaaagatgccatgcttgagtcagcggaaatgggtgggtgacgaagaaaatcataggtagcttgcaag  
cagaggaattaattactttatatacctttcactttgaaagcactattatgactaagcaaatctttcattc  
cccctacgcctctgtaccctattcctagcctagcctcttaccgccaaatgtgagaatgagctcaacctaa  
cgcgccaccgcgctttccaatagtcggcctttcgaggacgatgggtgacctgttcgattaccagctcg  
gaatcaaccgcctaaccggaatcctctggctgggttacctaaccctcacttactcctaccctaagacacca  
agccaagctttctcaccctatttagatttaagtgcaccgccttagggctccggttgaatttgacctggtaa  
atcccgccacagaggtcgttttctaccgggaaggcatagagtcgcatttttagtctgagcttgagcaaca  
aacactcacttaatcgaaagctaaataatctaacttggaatggtaacgaagatcgaagatcgaatcctt  
ccttccatcgtctgatctcctcctgagacttctgagcctaataatgatcatttttagctttgactcttcaa  
atcccattttttattttttctatgtttgtttacaagtaggcttctttcttctagagacaaacgaccgat  
tgaactacaatcacaggagacaaatatttcttctgtcaaccttcttctcttacgataatccaaaagaaa  
gaagtagagtcggtggaccaacaaccgccaggataaaagtcttcttttagtcatcaggaagctgatttgaa  
tgaaaagtaaacatagaattaggtctcacctgcgctagggacttctatgaaatcaatctcggtatagcca  
atggaaggaaatccccaaaactcaagaacctgagcttataagaccaaaacaacttggacctgccgaatag  
actagaagacgatatcatagttctgaatggcgcgactacctgatgatagggagtgctctgtcgcgttcc  
atctgtttcgatttcatttcaatatagggcaagtccttttccgacagaaggagtggtcgtttgggtga  
cagaataagattccccggatcttgactcgccttctcgggtggtcgttatgcttctggagttcaggagtgg  
atctgattcgatccgatgagagagatcagtaggggtcatccccgagtgagcagacataaagagatcccc  
ggatgacaggcctggggcgaaaactcttcaaaaagttctggcgtttcaaccctcgaacgaaaatttgatt  
gatgaaatagtggtttcgccttttttgggggctatctcgtgcctctcaatctgaaacaacaagcag  
gggaagtgtggaacaagtaagaagagactttaggaacaacagcaccaaaagataccttcggggtag  
acatggcaggcgggttagcttatagggctaacttcgcccgggaacttggtcaagagcctcatcgactggcct  
cttatcactttccaatagcccgaacgaaggtccagctttgtgaagaaagaggtttctgatatagtagta  
gagagatccggatttcttggcgcagagaagctattttccagctgatacactctcgaagatcagttgca  
acttcatacctcggctccttacttcccttgggcttgaaatgctcgggtctacagaggggtatctcagtttg  
tcaacgcaaatatgctctggatctagacaggtttggtggctcgctgagacctctctatccctatggaac  
ctaactctctgtctaaggattctgggtgggtgatctgggttgatgcagagttgtatcgtaggcttatggcagg  
ttgatgtatctgactattactcgtccagatctcacttttgctgtcaacaggttaagccagttctcatcag  
catctcgtacagcccagatgcaggcagtttacaaggttttacactatgtgaaagggacagttgggcaggg  
tcttttttattctgctacatctgatcttcagctcaaggcttttgctgattctgactgggcttcttgtccc  
gacacacggcgtctgtaactggcttctgttcattgggttctctctgggtttcttggcgtctaaagaaaga  
gcatactgtctccaggtcttctgcagaggcagaatatcgaagccttgcatctgctgtaagtgaatgggtt  
tggctcaaaaatttcttgcaggaacttggcattcaaatgagttcttctgctcctcccttttgtgataaca  
ctgctgccagacatcttgctatcctgttttcagcgtactaaacatatagagatcgactgtgtgttagaag  
ttgggtgcaggtctattcaagcttctctccgaactgatctacaaattgcagatgttctcaaaaggcatt  
acatccaactcctttccacaacttggtaagtaagatgggtttgatctctatttgatcccgggggaatttt  
gtgatgtaatgtgatgaattgtatagttgcatctgtgatgtgatgaattgtatagttgagctctgtgaa  
cgggtgtgtataaaccgggtgtaggtacttttctcctttgggttaaagctccggagcctccctagtagta  
gctcaataccctgagtagctgcgagagcttactcctcaggtcggaaatagaatagccaggcgggtttgc  
gtagccgctctgctcctgcccagatagactgtttgtgtgtcctttgttgggtttccgttctgacttccct  
atggctccgagtggaagaaagcggccaaaaggatagaaaagattccacaacgggaagcaaggcagccttt  
accaggttaccgaacctagagaacaaggagagcaactagcgaaccattatagtagtagcacaatcact  
ttctctgtctccaatccctttatgtccacgtaggaggatccctagttatggatttccgtttccctatcag  
aaaagtaagacaggagccataagtcattaacatccttttagtaataatctggttctgtttacagccgag  
ctgctttggaaaagaggtgctttctctgtttgattaaacaaccaaccgggggaatggaaatcccgtaca  
atattttgacgttttttttagagtaaaccccgctctttaatcactcgtagcaggaaagttaggaggtcctat  
cttttactatctccgtaaatatccttttctagatacagagggcaaaaactgtgtcaaaaagttaaaccgct  
cttttactttttgagacctctctttgctcaccttgtcttatgctaccgcactcattaggtaattgttc  
agtaatagggcagaggtacggagtaactcgtagtaggggatataatctaagagtcagaccttggacctatc



ctctctgattgtgctttgttttttaagaagcaagctagaggagagggggcttttgggataattatgata  
ctgagcccaatggaaaagcctccgagtcctaaatggaattactggggaaacgaatccaagaaagcccaat  
gcaagtagggccaacgaggactctgggtcaggagctgtcgagtaaggagtgctctgggctttgagaaac  
gcgggggagtagctctctactgtgcttctattattgctctctctctgagggagtgatcggtattaagc  
cgctggcaataaccgccaagaactctttgatggatggggcctttaagtcttcagcgtacttaatt  
aattcttcagcggactaaaggggtgttccatattaaacgtgttacgtaagaagactcattaagttaagata  
agaagactagcctgcctataaataagaagcagctttccgtctatatttgagaacacttagaagtcgaaagt  
taagagagatggatgatatggagatctataacaggctggcgaccattccacaagaaatcgaagccgaggaa  
aaacgcaaagctccactgggaggaaatgctgggcttgttctgggagcaccgcctgctctggaccggaa  
tttgggggtgcaaggatgcaagcttacgggaccgcatcggggcctgcaacaaaggatttctgggtctcc  
tgaggagcggaaactacctaattgtgtgtagctatcgaacacgctctccagcggcaggagactagaacca  
ctctcttctaataatttaataaggagtcgggtcgacccaaagtagctgcatggcttttctttgttctctt  
ttgttctatttctatgtctttttgtgttcacgtagctatgttatagtgaaactttgtcttgtgtgggggtc  
tacggtaggcttctcttttatgtatgcttgaatgcttccgctttgtgaaatattccttttaatatccg  
gtcttcatcttcttctgctacttcttctgctaacgcactgccccacagataatcaaagctctgtaatagcg  
gacgattctatcaaaccctaaagtagaagaaaaagtagaagaaacctacgaaaccataaagcttccctc  
ctgtttggtaacaaacagaaagataccattgatatcattggacactaaagggtaaaactttgctttgtgc  
tgttcacatagtcgactgggaagtataccggaaaatctcattaatcttagtatggaagagtttcttttt  
acgaagcgagagggaaaagagtcaccggcaaagtcttaactaaaccctgaaagcctcaatcttcaacttct  
tcaaggccttctcatttagtaggggcccgatctgactctgcagtgctgctaaagcagaatcttctttccatct  
gctaattggacctatgctcgacctcaactctgacatccataagtagataggaggcatcttctctttcct  
tgtacgttccagctcgcttctgctgcttcaggaagaaggtataaagtgtatctaccttcaacagcacatc  
actacataactaacatttagcctaacatctcgttaagccacccacaccgagatcgacagtcaaaggaagaa  
ggagatatttccgggtacaactcaaacgacactgtttcactaaatgaaccaaaactgggccaacacaag  
gctcagctctcctatgactacaagacataagcccaagacgagttttgtctacaaaccgaagcccaaagta  
tcctctgtctattttatcactaaaacaaaaccagagctgaagccatgaacgtacagcagctcattctc  
tgccacagtacagcggctcaaacccttctaaccgttaccatacgctccaagcttttagagatctgcta  
agatgaagacacgtagcatttagagaaggcttccctcaaatttgtattaaaaacagggaaacaattatt  
aagagatgtaagccgaaatgaaagaataaattcataatcttctcctcattgagcatttattacctttgct  
tacaaggggaagaccctcttcaaagagagtgcaattacttctgggtgagactttccgcttccaggttct  
gaatcaacaaagttttccttttctcttccgatttgggtgagctcggatcacttttttctcaacaatggc  
gaaacggaactagaaatcgagaaagaagagatcggcatcaccaccagtttccctgagcatactccgctc  
tggaagtaaccttacctagtgatcaaggggtttctacagctcagatcctcccagcactccaatgggt  
tgtgttgccgatcgcagcttctgttctcagatccaccagataatgtttctagcccttattatcttccggt  
gatcatccgggtctggctcaactcttaattggatctaactatgctggactttgtatatgttgactgaagcg  
ctcttttattgatggtagtctgcctcgtcctagcctagatgatcttattataagttataagatctgggta  
agggtgaagagtagggcgaatcctggattatgaatactagagatctcctgatcttatatagcaagata  
cggcaacggaagaaatgaagaaaaagggttatagctctcaagttccagctctgagctactgatgatcca  
aatgaaaagaaatatttttagctttaaccaagaatagacgaaaaagaggtccgaaggtgctttagca  
acgagactgatacctccgtcaaaccctacgtcggggaggaaagcagcaaatcacttgagggagatccttctt  
cagccactaggtcaggtgcagaagtctaagtgagtagccgcaattcgttttcaaacgtaggaagggtgc  
tgtccagcacactgcttttctttttacctttattcctaagagcaaaagaaggtaaacgcacaaatcacact  
cctatgctttgcttgcatattcttggaaattgctgggggtggcatgaccagagtaattctatgcctcgt  
ctactgcttatgttcagattcctaagctggcagaattctatcctgaaaattgcttccaccaggaagtaag  
ttctttccgcttctgcttttcttctcagagttgaagaagcctttgggttccaccgctttacgctttgaacctg  
gacctgctttcttctcagcataagcgcacactcccagcgaagtagccccgcagcctcccgcagccc  
gtagcctcccgcagcctcccgcagcccgtagcctcccgcagcctcctttgacggaggtttgacggaggt  
ggcgaagcaacctactttgacgtaggtctttgacgaggggctttgacgagggtttgacggaggtgacgaa  
gtaacccttgagggtgtgggcttgagtaaaagcagcaaatttgtttcactagcaaaagcaattgtccgaat  
gaagcgtctcatctttatcacaatgctacgaatccagagacttctctgcatcatcatctcgtctgtt  
tcgctctcgtccaaagcaaaccaataagggagtagttcacacattcagcttttgtgtgcccctagcgaagc  
aacctttgcattaaaaacatttgaagtctctctctaaaaaaaggcagtgctcagctttgccatattcct  
acactgttgttctcccttctttgacacacgatcaccgatttgttgttgtgttctgtgtaaaagggtttttc  
ctactttgtccattcttcttactactttgccaagtttctagcaagcagtggtgctgccgattgaaatctt

caatatctctcttgttgtcttagtgtgtgctgcagcaatgcttttctcggacttctcagctctccatttc  
atacgcttgttaggtgacctacaacaacatcaaacgcaagggtatctgtgtcattcatggcttgcgaaggg  
cgcttcgcccgggagtggtgctacagaacagaagctttttacttttgtcttcttctcattttgagcagc  
attggcaaagcacagatgaattgttcaatgggtctctcttctcctccgtgaagccagcagcatatcaatacg  
agatctctttacacttgtcaacccttctgtaggatatacccaagcatctttggatgattcacccttgaatg  
tgtcacttgcgattgctgacagtgtttgtgttatactttcgacttcttcttctcagcgtctgtccatt  
tactactatccttttcttgcctgcccgttctactcctttcaccctttctccacagcataccatgctc  
ttcataaatccctcgggtgcatcttcaccttcttttatagttccctttctgagattggctgatgcacagca  
atcaattccttagattcccgcagtgtgctgatcctcaccacctgttgaagttagtcttggatttggctg  
gtaagtaaaggtacggaaagagcggacaactaattaaaatctctgaacgtgatacgtaaatgggagaaaa  
atatggatgaaacccttatctatctttccttcggcaaaaaaagtttatgaagccatctcgcctcgggg  
ataagagatctttcgattctggagagtaagcttcaagctcaagatctcatttgtgatcttcttctcgcg  
aacctaactcaagtgaaacatttatattgaattctcaatttcgtataaaaaatacctgcctttcatttt  
attgaagagaaaaacctccccatttgaacgaagtctctggccttccccgttatgactttagagtatctc  
tcacgtcttataagtcacttaaaaaatgaatgacaatctataaaaaatggaaaccttttagtcaaagaaa  
gatcttcttctgaagaaaaaaaacaataagaattgttaccattaaaaaaaagcactcttctattcat  
ctttgtcaagacgacgatcccgttatatttatattatataaccggattttgccaatgaattggaacgca  
atcaactactcccttcatggtcacatagtcattacagaattttgtttcaggtatataatgtcttcttaat  
ttcatattggtagtacctatttttctatataaattctttgtggttttaccgcccgcgggttcgcttatc  
gccttttttctcctcggttcactttctcctttatcttcttctcctaccttgcggggggtgacttaggcgctagg  
gttaataccatattatatacgaataactccttacctttttcaagagaagcctgattctagtcaggattga  
aaagataatgacgaaccttaaatgaaaggttgggtccaatctgagtgcttattgtcttcttctcgcctct  
cctcttccgcccagctgatccgaattctcctcttagtataggattgttaataacttgacttaatgggta  
tagtgtaaaggttagtctatatttttcttctttatcagaggtttttccttaggccttggggggcgg  
ggcctcttttttgatttttttaataaaaaaaggggggagagggaccctttttgatataattgatatttgagcc  
ttcttttacttttgaaggatggagggggcgaatgaagcgtcgacgttccgaaggaacaaaggagctcga  
ctgtaaggagaggaacgagagtgaaacgagaggggaggtcggggcttatccatgggacttgccttggcggg  
tagactctcttttaacacatcctcgaattagctctcaaggtccatcaggttttgcctgccatctccggc  
gaagctccatataccgtgagactggatcactgtaattcacagaagtcatttggacctctccttttagtgcg  
agtatgtaaacacctctcctttcagtcgagttccctcttttataagagtaataaattacggttggacctc  
tcgcaacaagtgcgcgagtaataaacctctccttttagtgcagtcatttataacctctcgggagtatga  
ctcctcctactcctcctttccgaaaagtctccccatcctcacaagccaacctgacagcctcgcaagataa  
cacgtacaaagacagatcagatcaaaggggttactcccagcaacattactaacactttactgaactaatga  
acatccatataactttccttcaactaatttcttttagacggacttccctcttcttattacagttagaacg  
gattgaaaaacaacttacacatttggcacaagcggccccattacaaacaggagcggcgggaccgggac  
ctccactagatttagggaggcagattgcccacaacaaagcacttcaacttattcttatcttatagtgaaat  
tcagatcaaaaccaaacaagcagcgcgtcttcttaactaactatttagtttagattccagatgacaacca  
ttctacaagacaagacgattcaagaagcgtgccttgaagaaaaacgattccaaattacaaaacattc  
gaaatgacctcctcccaataatctaagagctacaacgcagcgaagaagcagtgaaatcgatggattg  
agctccaaacatccataccactttccttcaactaattagctggacttcgaaacataggaatcaaactggga  
gaacaagacataggagaagacagatttcgcacctacatgatagtgccagttacgcacgtactttatgtga  
gtcaagccagaaagcagtgggaaaacatcacgctacaatacaacagtacgtagggtccaatccacgaaag  
gaatacaggcgtaccgagggagcacaatagctagcttataatggaagggaaaagcacaagccttaccgag  
aaacccatgctagaataggcctatgcactcccatcacgcaaggaatcagatcgagcatgcaaaaatt  
cataataaatgtatcataattcaaggcagaaatcccatcgagcatgcaaaaattctcaattcaaggtgga  
aacacctccatctattcaaggcggaaaaatcgcatccaggtaagagtgcaaaaattcaactactgcatga  
aaattagaggggaaggaagcaagtttaataatcgcatatcattcctttttgacatcacgatttcagagacat  
tcatagctcaggaatccaccattaataaggtcccaatgccactcaattatttgagtcgtttcaaga  
aggagatgaaagcaggtccaggaaggtcgttttgtttgaagttgatcagtcataatataatctcctccgcc  
cttggctcataggtagctctggaagttgggatgtttgcaattctaaatggagggattgggaaggaagag  
gatcaatgccagctaaaggttgttaggtatctttgaaagagtacggttacagttcatgtcaaataagagtg  
gtgggaattccatctcaaagaagagtggttgggtccagtcctctcaaagtttgaggactcaaagtatgggt  
caaaatctgaggtatgagttgaggtgggctatgttggcactgcgaggtcgttcttctgtttaggtctcc  
ctccggctccgggtcaaggcatctctgggcgctgttgaagcacgctaagaagtcgctttaggaagtcaat

gctgaacgcttttgccttcccgcaaacgaatgaatgcttcccgccaaacgaggcttttgcgccaacgaa  
cgaacgaaatgcttgaatccgaagatgcccagtaagtgcgatggtcgggtggtagcgctttctgagaatcttt  
ttctttcaaagatacggattggcttttcttccctctcccttggtcagagatcaaattacaaaaccaaga  
ttccgcttggaggacagatgagttcctttgatcccttggttgatgaatccaaggcactgggtcgacgt  
ctaggtcagaaggtcaaggcgaagtcctttcttggtcgatgagttagtaggtcatttctaagagttaggt  
cttcaggactatatacataaaagcggctaaggtctttctatagtttcaaagtgcctaaactccagggttgt  
tcaccaatccaatataaggtatcagcacgtgaagagatccggcgggtggcggtgttatctttcaaactctc  
aatctgaagggagtagtcaccaatataatatactttctaaatagaagagagaatccccattgctgtaaccc  
gggttgtcttcagcctagcttgcgtgctcagctagaaagaatcccttgccttcagccgagcttgggtccg  
gggcacaggtaaagaaagaatcctccgcttccagcctagctggatcctcttgaatcgtctctccgctcaa  
aaagaatgtggcggggaaaggtaatgggttgagagagaagatccggctccggccggtggagctatcatatc  
ggtcttttcaatcttgtagccgagcgttccccaatatagcctaagccagtgaaagagaccactaaatgctg  
tcatgagcagcagtaagtcgacgaagaaagtcctctattctattatcgagttgtcgttcaaaggcggctca  
agaaacccttggttgcgttcgaatgtcccgctgaaggctctactatttctatttggttgtgctgaaattt  
gagaaaagtgatcaggtcgacatctcggctcaaagaacaaaggctagtcgtcaacgagcaaaaggcagccag  
tattgttcaaaggttctccggctcgagtcgggtgatggctccttctggattataatttctgaatggc  
cccagatagcgttaagttgatgggcttcaacctgagaattctcaatatactatgggtgaatgggtatc  
agaatgcctcttccgaaatagaaggttatccggcttggttcgtgaaagcacagaggaattcaaagcattgt  
agctgttccgaggaagttcaatccagagatggcttgggagcgttaagtggtgacgattaacgtgataga  
acctttccgtagttctttcccttttttaaccttgggttcagattccatgattcctttctttcagttg  
cagattcctcaactgctcttagacaaatgtagtccgagagtaagatataggctaataaggaagaaagcg  
gtcgttccgaggttgcagtttccagtttctaggaaggagaaaccgggtctcgaccaaatacaatccaatag  
agtaaagggctagtagcggcttcccgggctcaaggctagtgcaatcttggctcttatttgagaaagaag  
tagccgagcctaggacgaaggcacgaaatgcttctcgccaatgaatgaagaaatgggttctcctttccc  
gcaaacgaatgaagaaaggggttcccaagtgcgggatttatattctattataatagctaaatcgatt  
agccaactttgcccgaagctcaggagttagtgcttcccttctatattcattatataataggtagacagat  
ataaggtcaacagaaggtcaactcgcttcagaaggctggaggtaacctaagattcctaaatgcaggggtc  
tcatgcatccaagtagctgaaaagtggcaacttggatgttgaagaccgcgggattcgctcggagac  
taactcactcgtctcgttcatgtatttactcgcagcattcgcagcaaactcgcaggcaggagagaccttg  
agtcctgtttcctgcttgacctcgtagcgcatacaagagacttcaactaaatcactttttctttccaag  
tagtcaattagactagagccaactatttgattcggctacacttcttgacttcatgaatttacagattgaa  
aatgaaaaaaccttttagagggggatttgcgggtcttattcaccactttcaactgactccttatccaagg  
aacagaaagctactacagaagctcgcggcttactatcttgaccagcaagaaaaggtgaatggaaaattgcc  
tcagatatctttctttcaaagccgtgctatctagctcatcttatgacaggaagggatgctcgtgactaa  
ggctatacgttgccccgattgcttcttcgctcgttcaagaattctatcttttcacatcgccaagcttcta  
cggtagcaaaagaagaagggaaactttctggtgattctctggtcacattctctttcaatctctctgcataa  
tagacacacattcccagcagactatctagcttctttgaacaatcttcttgctgtctctgaaccttcttct  
cagaaaaagaatgagaccaaagaggccatgcaaaaataaattgggtgactcaaatccaagaagacttcgg  
acattaccacctaatacaaaaggcttataggctctaatagtataagatccagctctcatcctgatggttctat  
tgagagatagaaagcgtcatttagtagctaaagggtagacgcaagtgattgggaaggatgataaagagacc  
ttcgttactaaattttaaactgtgatggttctaataagacttgggtggcgacagctatggcctatctacc  
aacttgacattaagaatgcttatttacgacgtatgagaccgtttgcctgttttcatccccatatttgggg  
taggctcccatacctcccataaggattgtagatttgcctcgcctcacccaatcgaagggactcctaggg  
gtcgtttcatccaccggagagccatccttagttggtttggtttctaagttccctgaaaaaggataaaaa  
tatccctttcattaaataggtagctcactggagcaagcaacgaagtgccataggggttcaggataaactta  
tactgaagtaggtataggtacaatctcttgggtgatcaatctatagagttcatagagaaggaaaaacctg  
agattagagttggagaaagccgcatagaatacgaagcaaaagcgaaggtgactttacatctcagtcga  
aagcggttaatccggatccatttcataagtggaactggggaatctcaatctcaaaggtcaaatgctttcag  
aagaggtcagaggttaactgttatataggtagccatgctgtttaatagatcttctcgtgtaggtgaga  
gtatctttccgcataatacaaatattccttaccaggtgtccagcagagaatgtttgactacgtaagcga  
gcagacgaatccgcttagcctattactattactcaaaaatgtggctcgagacccctccttatttacata  
taaaagaattgcacgaagtccgatcgagaagatagatggaaagcagctctctagcaacagctacggagggga  
acaactgacctcgaactgacctaacactgaagacctaaccttgaagctgtctgggtctttggtagtccaa  
ctactaaatctatagagatgccttcccaagatctctcggtaggggtatggatacactcctcttgccact

tttttcttctgacaaaagacgaaacgcaccctaagagctctatcttgcattagggagtgcggggttctcct  
acaccaccctactgttttgtttgttcatagggggtctccaaccatgcggaaagccacacaatcgcaacag  
gcacgatgttctcacaaccggagtagagttatatggatttcattatattatgactgacattccttgcttg  
ttggacaggaactctttgattcaagatcccccttctactactggccagtaagataagggactatctagttt  
gatcatttacgaattgcgtagataatcctcaagtgatagaaaggttagaagacagagaattcgtgggtga  
gctcccaggcaagcaagctattgatgatggcttctgtgctactcgagtaacttgtgctgaggtggctgtg  
actcaaaaggtttatgtattatctccaaaagaaatgaaatttacgtgatgcgggaacctactttccct  
agatccggattggttaatatcgaaacggagaattcgttaccttccggtatttgcttactttgctagctaggt  
atctcctatcttgagactccttactgaagtaaaggaaaaggcacttccaaagagctgacacaaaaaggat  
ttcaagtccttggctttgctctaaggatttcaagtcctttgctctaactaaggatgaggaacttgtgcca  
gagctagaagtgagtcggattcgaaccgcagacagaaggattttcagtcctctgctctaccagagctac  
tacctgtcctcacttgatgatctaaaatgtgagatcgatgcaataactcgactgtaaggccaccaggtc  
cgtaggagagtcagtccttctctaagcaagctgtttctggcctatacggaaagagttttcaaagaggaa  
cccagctcttctcccctctcagcggagaaggaggaaccaagcttctcccctaaaggagaaggaggaaacc  
cctttccttccgctcagtcctcaattttcgttagttctctctcttaacagagcgggaattctcccaggtttc  
agtctctttcgttactgacgaaccggagcactcgcagtccttaataactaaatataatccctattcaccac  
ataggaaccggccggagcttgactaaggactttattattgactggactctcctatactcgggaattgcagg  
tggagtttcaattctctcgtgtagagctattaccaatataatcgatccttctgatgttcacagtttgactt  
gtgggttagactcttctctaaagagttcaactgctttgtcccttccgaaagtgggttacatggggctggg  
aggctctctgggtgtgacccccggaggaaccctggctctaaatagcaagactcgggtttgttccggttgat  
ttctagttgggaaagcataagtagctgcaacacataagattctatctcaccagtgcccggggcgagtagt  
tcccgttgcaacaaagtaagtcgtttttgcccacttctaaggtttattctagactcgatctcttctctgtag  
ctcatgaactctcattcagaaagatttatatcatacagcagtgagcctttttgatcccaatacatatag  
cacgaccgggttgggttcttcttttgtaaactcgtgtcaataaataagggtgaagaatctcctgttgcgtga  
tatcagatatcacatggaggaagacagctgtggcgcccacctgcgctgggtccgcgctgactactgttcc  
ctaacttacattccattctcaggatttgctttcccttacaaaactatcataaaaactgtacaagcataaat  
agtgaagatctccttcggaccctcacctcaatagttatcttactagcccacggaactcatcatatcaga  
gtaagtaagtaagtacctcaaaagagagtaatgcttataggaggtctatctcccttctgtcatgccctt  
ccctttttgcttttttagtaagagctgcctcctccttgctgctcgcgctaaagcaattgtagcagctaca  
gtaggagaagaatgccgacggctttcgttgtttatccagtagttgaactttcgggaatagaataggctcaa  
tgactttgcctgctttcttgcttgcccgtatcttctcattatatagaaaagccttgaaagaacccttctg  
gaccaaagatgggcatcccaatcactttttgtcacaaccaactcttggcaaatgtgttcataatataatc  
aataatgggtctcgagctcatctgtaaatcatggcatgggttagagaagaatggctagctatccttgagtga  
cacatcgcaatgatgtatcgaagacgggaggaggaacccttactttactatattatataatgtcaccatcc  
aatcttgggttatattatgtcaattctgcctcatcgtgaatgaaacgtttttctttgagtcaccattctgg  
acgacgagaggaatgggtgaaatatactttttaatgggtaaaataaatctctgcttcggttgccaattaccg  
tctgctaccaacaaaaagccactttcgtatgaatctattctagttccttacctggaaaaaaacctatt  
ggatatcccgacttgacgattgactctattggcttatcaatttctcacgggctggggaaaaagccaaacag  
aaggaaaaggtacggaggaggaaccctggcatgaaggccggagattagaatagaatgctgacttctagt  
tttagccgggttaggagatcggggaagtcttaaaagtgagtgcatcagtccttatccgattacttaataga  
agtcagtcagtcctcatctttgaattgctgagaggacttaggagaagcttattcgtgactatgagcaaga  
cccgcggtagtgatggctacaagtgggttacgagaccaaggtgggggtgctagactgagtcagaggagaa  
agaagtggaatcaacgggaagacttcattgcgagaatcaatcatatggaggcttgacagaccttcttcccta  
tggaagcaagtaatgtatcgggtaaggccggtctaggtacataatagttacatcataaatgagtgctct  
tcgttgaattctgactttacgggcagttagaggaaatacgtttttcattgcgtagatcgaggccgtgatgc  
agaagacaaggactccttggaggaaagagattacaaaaactggcgcttggctgtcaggcgcaaccttt  
tgacttgggttctccttgtcagtaaatcgttcttccagttctgcaagactgggttatgtcgcagagctgca  
gttttctttttcttgtttttcgcataaaaagctgttgtgtaatagaagcgcatacaagctagcactga  
taagtaagcctgctcacaatcgcatctattataaagctttctttcatatagaaatatacagctgtaacta  
tactggctagttagaaaagcaatccggcacgtaagcaaacagtcctttcgacgcttaagcatatcagctc  
ttctcactatctttgtatcagctgttctatcattccttactgaaagtcgggaataaagaaagcgggttact  
ggtgctgttactactcttccctaaaagccctgttggcgcatatcgtgggaatgaaagcagttcctagtaat  
tcttacttgcagcactgaaggctgttgtcagatgttgaagttactgtcgcacaatccgctgctgatctat  
attcaaaaagattgtgtactaatagaagctgttccctgaaatctagcttagtcgcatttctctatccgcatg

t c g t c c a g t g g g a g t g g g a a a t t c c t g a c t t c a a a c c c t g c c t c t g a g g c t a a t g c c t a a c t a g t t g a  
a c a g c t t a a a a g a c c g c c a g g a g c t c t a g t t g g a a a g g a c t t g c t t a t t t g c t c t c t a a t t t g g a a a g a  
c g a a a c a g t t t t a t a t t g a a t a a t c a a a a t t g t t t g g g c c g a g t t a a g t a a a g a c t g g c t t a c t t a a c  
t c t a c c t a t a a a g a t c t c t c a c t g c a c a c t t t c t a t a g a t c c g a g a c t a a g g c c a t a t c t c c t a g g a c t a  
t t c g c c c t a t g c c a a c t t t c c a c c c t t t t t t t a a g a g g g t t g g c t t t c g c c c a a g t a g g g t g c t t g g c a  
t t t t c t c c g g t g t t c t g g t c t t g g g g t t c c c c t c c c t t g t c g c c t t t t a t t t t t t a c t g t c t t t g g a c  
t a g a t a g a g a a c t c g c g g a g t g g g g t t c c t a t t a g c t t c g c a g c t t t t a g g a t a c t c c g c g t t t c a t t  
c t g t c t a g g a a g a g a g a a t c c c c t g t a g c t c t a c g a g g g g a a t t c t a c c t c t c a t t t t g c t t t g t c t c  
a t g t t a t a t g g a c t a a g g t t a t a c g c t t t t c a g g a g a t c t c t t t c t t a g a c c c t g g c a a c t a g c c g c t a  
t a t t c t c g g g a t c g t g c g t t c t t t t a t t t c c c t g g a g a a a c g c a c g c t a a c a g g a t a t a t g t g a c c t t  
t a c t t t a t t c g g t t c t c g c c t t t t t g t a t c c g t t t g g c t c t c g t c c g c g g c g g g c a a a g c g g g a a t a  
c c g a t c g a a g g g a t g g t c t t c c t t t a t t t c t g a t c g g t g g g a t t g t t t t a t a t g t c t t a c a a a a g a  
t a t t t c a a c t c a c t c c c a a t a c a g t a c a g g c c c t g a t t c c t a t c c t c t t c a g t g c a c t c t t c t t c t t t t  
a g a a g a a c t t c c t g c g t g g a g g g t c t a c c t c t c t t g a a a t g g c t a a a a g g t c t a g a c t t g c t t t a c t a  
c t t g t g g g t c t c c t g c t c t t a a t t t t t a a t g a g a a t c g a c a g g g a g g a g a t g g c g a a g g g t c a t a a t a g a  
a t t a a g a g t t t c g a t g c c g a t t g a g c t g a g c c c g a a t a a a a t g a c a g t g g g c t c c c a g a t t a c t t a g c a c  
a c t a a a c c a c a a g a g t g c t c c a g g a a c t g g g c a a a a a g a c c t a g a a c t a c g g a c g t g t c t g a t g c t t t c t  
t c c t t g t c c t t g a a a a g a g g a a g a t t g c t a c g t a g g c t g t g t g g a g a a a c g t a t c a g c a a c t c g a c  
g a a a a a t g g t a a a a a g g g g a a a g g a c a g t a t t c g a t g g a t c a g c c a a c c a t g a a a a c t t t c c t t c t c c g  
c a a g c t c t c a t c t a c c t t t c t g a a t a g g g c a t c t c g a c t a g t c t t g g a a c c g g c t t c t c t t a t g a t a t a g  
a t g g t t g a g a g a t a c g a g a c t a t g a t g a a c c g g a a t a a a g a t a a t g c g a t c g g a c a a a t a a t a c a g g c c  
a a g a a c c a c a c c c c a a a g t c a g g c c c t g c g a g g t a a g g g c t c c a g a g g a a g a g a g g g a a g a t c g g a a t t  
c c a t c a c g c a t a c a a t a a t a g g t c c a a t c t c a c c t a c c c g a g g t t t c a t c c t t a c a c t t a c a t g c c c c t  
t t t c c t c c t c a a a t g a g a a g t c c a g g c t a c a a g c c a a g g t c c g a c t t g g a a g g g g c c g a c c t t t a t c  
g c a a g c a c t t g a g a t t c t c c t a c c a t a g c a g t c a t a t c a g t a c g a t g g a g a a c g g g a a g c g a c a a g g t a a  
g a a t a t a g a c g g g a g g a g c g g a t c a a g c a g t c c c c c g a g t g a g g a a c a a g c a c t c c t a g c c c g c g t t t  
t g c t a c t g g g a t t g g a c a a g a t a g a g g c c t g c c c t a a g g a a t a a g a t a a c g g a t a c t g t a a g c t t a c t t  
a t c c g a g t t c a c c g a c t c a a c t g c t a t a c t a g c t a t a t g c c t t t a c t c g c t a a a g c t g c t a a a g t g a a t g  
c c g a c g t g a a t a a a a c g g c t a t g c a a t c a g c t t t t t c a a c t c t t t c t t t t t t t a a a g a g c c g t g g t t t t  
t a a t g a a t c a g t a a a g a a a g a c c c a t t t t t g g g t c c t c g a a a a g g c t a a t t t c g t a t a g t a t c t g a t c t  
t a t t t t a g a g a g c c g a a a g c c t t c a a a a g t t g c a a t a c c c c g t c t t t t t t t g a t g a a c t t c g g t g g c a a  
c c t t g c t t c a a a g g c g t t a c t a g c t a t a t g c t t a a c a t t a t c a c a t c g g a a g c a c t a g a g a g a c t t c g a c  
a a a g t c a a a t c a c c a g g a a g t t c c c g t c c c a c a a a c a g c g t t g t g t a c a t t t c c t g t t a g g g g g a g a c t t  
c t c c a a t c c t a c t t t g a g a a g c a c c g t t c c t t c c c c t a a a g a g t g a g g a a c c a t c c t a t t t g g c c a a g c t  
c t t t a c a g c a a g c c a a g g g c a a a g c t c c a c c a g t t g t g a g t c a t a a g t c g a g c a a g c a a g a a c g g a a a c g  
c a g c a a a c t a g g t c a a a g g a a t t c c t c g a a c c t t a g g c g g a g c c a t g t t t c c c c c g a t g c a t a c a a g t c  
t g a a t c c c a a c a t c t a t c t g t t a g t c a t t g g c t g g c a a g a a g a g g a c c c c t t g g c t g c t g a c a a g t g t t  
g g c a a g t g c t g c t a g c g g t t c c g c a g c t c t c c t t c g t t a c t t a t t t a g a a c t c c t g t g t t g a a g a g a g  
a g c a t t c a c c g a a a a t g g a a g a t t c t a t t c t t g c t g g t a g c a t g c c a g t t g t g a g t g a g a a a t t t g a t g t  
a t t g g c t t a c c t t t c c c t a c a a a t c t t a c c t c t c c a g a g g c c a t t t a c c t t c t t t c t c t t t g t g t t g g a a  
g t a t g c g g a t a g a a g g c t a a g a g a t a a g a c t g a g c t c t c a c t c a g a a t a a g t a a a a g c a g c a a g a a t a c  
t a g g a a g a c a a g a a g t g g t c t a a c a a g c c t g a c a c g a a g a a t a a g c c a g a g g t g a a t c c c t c a c t a c a a g  
a t a a a c t g a t g a c t c a g c t a c t a c g a a g g a g a g a g g t c g a g a g a a g a t a t c t c a a c a g a g a a a g c g t t t  
t c t a g g a a g g a a t a t a a a c t g g t a a a c c t t c t g a t c t c t c t c g a t c a g a a a g t c a g t t c a c t g a g t a a g  
c t a t g t c a g a t c t g g t t a t g c t a g c a a c c a c c a a g a a t g c a t a g a g a t g a g g a g c a a a g t g g a a c t t a g c  
a g a c a a a g a g g a c c c a g a a t a t g g g g a a g a g a g g g c a a t g a a g a a g g g c t g g c t g t a g t a t g t t a a t c g a  
g t t c c g c t c c t g g g g t c t a g t a a a a g t a c t a g t t g t t a t c g g g g t a c t g c t t t g g a t a c a g a g a a g t c g  
t a t g t t c t g t t a a c c g g a g g a a g g a a g a g a a g c t t g t a t g c a g t g g t a c t a g t t a g t t g c t c c g c g a t t t  
c c a t t a a t g a a g c a g g g a g t c a t t c t c a a c c a a t a t a c c g a t t c a a g c c c c g t t t c g t c t a t g a a a g g a  
a g t a a g g a t c c t c g g c t g a g t g a g t a c t g g c a g c t t t c t c c t c t t t c t t t c g c t g t c g g a g g a g t t a g c  
t t a a a c t a t a g c a g c t t t c t c t t c t t t t g g a t t t c t c c t c t t t c a c a t c t t c a c c c a a g c a a a g g c t  
a g c t t t c t c t t t t g c c a t c c g c t t a c c g t t a g c t t t c t c t t t t a c c a a g g a a c a a a g c c a a c t g c  
c t g g c a a g g g a a g g t t a t t t c g c a a g g g a a g g t t c t t a t t g a c t g g a g a g g g a c t a t c a a g c t g g a g a g  
g t t g a c t a t c a a a g g t c t t c g t a t c g g a t g g g t g a t c a g a t a c t t t c t t g g t t g g c t a c c t g t t c g g a a

gaagatcgatgcatcaaaccacatcattggccttgggttgatcattggccttgggttggcttacctcgggtat  
cctgacttcttttaacggcttcttggctgggatagattgctagactgacttccatgtgtgttctcacttg  
ctgggtgccctctccttctgttggcttgccttcttctcctcgcagggagactcttgcatacattgagaga  
ggctaagggatagaggatgtaggttgccttagtgatcgctatcgaagtggtaggggttagaggaggatg  
gataagaccaatatgggtcaaggaacgattcccgatcaataacatgcttcagcagagatagagatcaatag  
caatgccgagctaaacggaaagatggattagaaggacgatagcgtcaactaagtgaatacctgactctcc  
ttccgtcaacgctgccactcgactataagtaaaggatgaagacccctggactctagagctaccagtcct  
cttgccttctctgtacgctatggcaaggctcttcogagactgagtcgtaggtctgctttgcaagtctgag  
attccatcttctcatgctacctgaagaaaggaggattcatcagcgtaggcaggcccagaagtatcgatt  
gaataacttactagcaattgaatctctctattcaacagtgaaagttcttatccctaactggaatcaaa  
gcagaggagtgtgcttctgggtcttaagtacgatacggaaagtctctgggtcggcaaagcagagagagac  
ggagtgaacgagctatctcttctatagagagaccgctgttgcagtccaatagcagagagaagcagct  
cctatgactcgacccccgctctcattccgggaagttagagtaggcccgaattcgaggtgttcttggaaaagg  
atgctgatcaactgacagaagagaagaagactcttccgattgaggaaatgaaggagcaatcatagatgga  
ggatttctactgatatcgaaggattcaattgattcagattgatgatttcttcttaccgggagatatagatt  
gaagcagcgggtgggagtcttccgatagataggaacatagatagacgaatcatagagaggcaccaccct  
caccctctcgtccgagtgctcaggggagggcacgactgggctgctaaccggtcacaccaatgctcttctgt  
cggcttctaaaccataatctgttgaatctcctcatccgtagggaaggaaggccaactcgagtgctctgac  
attggctcctcgatcagctcctcaggggtaagcagaggagatctctgatctgaccttcogatcaccttatc  
tttcttggctgagactcaatcccaattcgcгааagcaacacagagaaagaattccactttgaagtggcagg  
aaagagcggtagctacgggataatcgcgtgttggagagagcacagagctttatccgaatctctgcagcta  
agggttagatcctggcgtacgtagtagtgaaagtgaacggcaagggtcctgggtcagatggtgaaggctat  
gttgaagctattctcctgggtctcaaggctgctcatttctcaatggagaagaagaacctcgctaccac  
acatagaaatgattaactgtaggagagactagttcatcgcttacatccgagtcagccggtgaagccaaa  
gcagatgtctagccggagagagaagaggagggttaaggattcgggtggtagagaaggagaggcaacagtcact  
agaaatcccttgcaagatgtatcgagaggaaccccggtgtaggctagaagcttcatcgagataggagcga  
tactacgaataaggtatatggggcagagtgccggacttaccgagaagttcacttcagtaacgggaagcct  
tccattcttcttgttgcactctcttcttgttggcttcttctcactcttcttcttctcagcaagacgaa  
gcaaaagacatagagttcagccagttcgcttcgcttgactaaaggaggctgcagaccgacagcatcggca  
tcttgaccttgctcgccgggagttgtcctgcctctgcaggatcaaaagaagcgaaagcgataactcgac  
tgaaaaggaacgaagtactcgacttaaggataggaggcaaggagaggcagtcacagcagccaaggcagc  
tttgggtgttttagcatcaatcccttgacgacgtgtgtacgtacgaaagagggaaacaataagaggaaaga  
gaggaactatcggtagtcagggcatgggaagatggaacaactgccccatttcccttgaccatagaag  
gtagaacgactcctaataagctgaacaacgaagatctcctgtcagctggcatggcatatagaaagga  
aggagaaagccgaggtctgaacaacaacacatcaagcaccatattcccatccaacaaacatattctga  
aacctgactatctactcaagtcgaggagggaaaaggctcagtcagaacatcataagatttcaatccaaga  
acctcagcctgaagtacagaccatgcaactatcagtcgaaagccaagtcagtcattctagcccagagag  
gaactatagctgcttcttcatcagcctcgaactatgaaatcacataagaaaaaagtgcataaattga  
ttatgaagattgagacgaaggttcccgggttcagaatgagcttctgcgccggaagtcccgaatcttac  
tcagtgggcatcataaagagctcctaaggggaggagaagctagcgaatgagtcagcctgaaaagaaagt  
cgaaccgcaaggcaagatcctcgcccccgatgggaacttcaataaagcacagtcgagtgctttac  
ctaccagaggtatctatagaatgaaagaatcattcctacaagtgatccaccttccagatattgaaggaga  
ggacctatacctagcaaaaataagctgaagcctgaaaagaaagtcgagacctaaacaaaaaacctgaaat  
ggcaggttagttgtcggaaatcgctttttatatttatattgtagtcagccagcgtttccagtagctccatc  
caaaacttgtttccgggttttctaaacacgagtaaaaggtagtagaacggtttcctacgccgatctatat  
cgatcgtttcatgttcagtcacacaacatttatgtctcgttctatatcccgttcatccggaataggtta  
acctcttctagcaataaagactgggtctttaatcgttttttcttcttactttatcgcatttcaagctt  
aggcgtcaacctctaaaaaaatgggatcttggctttggctcgttttaggttcaagtgaaaggtttgtggaac  
ttcccgacgcgtgccggtgggtttcctgtactccgggcgcggaggaaaagtaggaatcaccctccgctg  
atcgtgatagtcgggtctgaagtttgataagaagagagaaaaaatccctgaggggttgggcccgta  
ttagaaccctcccaatccccggaaaaacggggacgaattgagaaagggcacgactcaggtcgtcca  
taaagagatagcccccagatcaagtaccaatttggtaagaaccagcaaaagcagaaagtgagaaatcaa  
aaaaagaaggagttggcattttgttgcaggtgctttataataggaagcctacaaaagtaattggaaggt  
tgattgatagaaacccaagagagacttgttctcaaaatgaaggaaaaggtaaatcgacgggtgggtgttg

accaacggaaagggcatgggagttgtaatgtaaaaaataagaataaatgggatttgatcattcagcgcgg  
tgcagcccatataaggtaaggagcttttagctgttcacggttacagctacttcggtggctcttactatacta  
cgatattttaattgatcgtagctaattctgattccattgcgaaacgaaaaccgctccttctctgtaacaa  
ctgattctacacaagagcaaaagagcctttttcttccctaaggatctattcatttttccattaacagtcca  
accgaccggagagagattgcttttatcacagaccagaaagccaggaattgcttccatcacagaccttctc  
tgggtcaccagcctcctcgctcttttgcattaacatattccctcgtacctgacttcggttagacgatccta  
cttaggggcttgaaagcagaaaacagagtaaggaatagatgctgctagggctcatacgaagaagccaact  
cggtaaagctagtttacgggtccttttcttgccttgacgggtacgcttttaaccaagcctaataccatataag  
aaaagcaacaactatgaaaacagggcaagaagatgcagacgacgggtacgcaatgagactggagtacctg  
gcagggggcctaaacagacagtaaggggggtgggtctaggagaagagagaagaacgaggggcaagcataag  
aagcagtcattgaaaaaaatcagaaaagaaggagctgatccgatggatgaagataatgatcaacggaaac  
tatcggctatgaagctagatggcatagaagaagggtatgccaatatggatggcttgcctggaaactagcc  
atgtatgtactggcttccgactactacttgggtcggatcaatctcactctcgaatggaaataatcaac  
tcaaaatgtgaggggaagcactaagcataacatttgaatgaggggcccctcatcaaaatgaatlaatgagtt  
tcttcgcccctccgaaggactcgttttcagctccttacttacccttatataataaaaaaagtcaaaaaat  
aaaatgattacacagcccacttcgctccgctgctttgctcgctccgacgattctacataactaatacaaaa  
gtttctctccaaccagtcgagttactacggttagctgcgggctccacggagaaagttgtcggatagcagcg  
attcctattgctattctatggctttttctgtctttttccctttaccgggtcctatctcgagcagaggatc  
actctgctctttgggtgctcgggattcccattcaagaaccagtaactcaccgtctgattcacgcggatcag  
agccatcgagtcgataataactgttcttcgggtgcagctctgaccctacagcaagatcacgcggccttaa  
ctagatagtttaggggacgagttctcttaactcgatcttattatgtattatgaagcccgttttgcggt  
gccgaactcttcttgatattgccatcaggtgaaggaaagaggaaccctttgccatagaccaattacctg  
agattgactagcatgaggacagataggctaaagagaggttaaccctagttgattctgcactccctaaga  
gaacaatccattcctttagcatagctaacgaataaggaaaacttaactacggcgctcaccgaatgtatca  
ctcatcccgtggtaaggagtcctctgtgtgttataatctttatcacctctgtctgggtccgggtgctcaa  
ctttaatattattttgagtccttcttttgaaaaaaatgtattccgaacagaagaagacaagacttcttc  
ctggattagtagtgaaaggaagaattagtggttgggttgggtggttgaccaatgaaaagcatgggagaaaga  
aagatgcattttcgaactcaacttgctgctgcttgtgcttatttaccgtaactatgattagtgagcttg  
ctcgtatttctgtattgcataactgttttgcctgctcgcataccaccgtaactaaaagtgtaccgatttcc  
gcctatttgcctctctcgattgcaagaggaagaccatcgctctactcatcatgtgaaatgcccaaacat  
ggatattgccacctacacctgatttgaaacctttagcccggccggaacccttttttttctttatccct  
gatcgatccttggttaataagatccccctgactcgccaatctggaatcgaacgagtttgctaatctatatt  
atctcacccccccccgacctcagttctcctgtgccctagctgagacttattgcttagcagtgataaaaag  
aattctattctatagtcataactaccaacagcgaagatacagagaagaagaagaagatgtaggggaag  
ggtagctgtgaaactaaactggaatacaatgagacggtgatcctccttgggtctgcaagccaactcagagg  
aaagaaaggacggaacagccattacatcagtgatcggcaaacacagggaaatcaacagataacaacgaat  
gacatattgaaggggtatcagtgatattccaagctggtaaacgaagtaagaaagataggaaagatatttaa  
aaaggggctatcgcccctgcttttagctacacttacaaggggatcactcgagaaataagctgtgattcacc  
agctcaattccctcgttagatagggggatgaaacaacagctacaaaagtaaccaggggaaaggcagatc  
cgaaggattgatacagagagggattggacgaggaacagtgaaatcaatcaaaatggatggactagttcggta  
tattcgtaggagtcagcgcagacgggggctaagtcagctgcttaaccttaccatataagggttacggtaggt  
gtgactaattaatcactaatctaatctcaataaaaaaattccacatcctgacattccaacatgtgactca  
ctgcccgaacttgtttttatgcttagcagggatgggttcgggtgggtaagaaacatagtcacaggaagactaa  
ttgagaatgggcccattggaccaagatctgatccctccctgactacggaaatgactcaatgagaaagccc  
ccgcgggtaaggcacagatccactgaccggacctgcatggaatgggtccatttgaacgggttcgggtcact  
tgctcgaaggggatgaaaggtgggtccaagcacttcatgggagagagattatggatcttgggatcgtt  
ttgtgttaacctgcatactcggttaagttttgcccataaaaaattgctaaaactcgaagttaggttttacc  
ccaaaaaacgatgctaggttagtaattcgatggaaaataaacaatcggatagacctgtttatccttct  
tgcgagaaaccaatttgggttggcttgaaatctgacgatatttgataacttgctcgggttgtttgggttaa  
cttgattaatgttcgggttatctcttatgatgagcgattttaatgttgctttttagtaggaaaatcactctg  
gaggatgaatcacaaaagaggtcaatggatcttaggctatgcatggagtgtcttatgggtcattcatgggt  
ttggtaaatgggggtaccgcttttgcagtgggagctttgggtgtggaagaacaccattatcacagggcaat  
tgcgtttctaacctccatattcttgggtggatgatataactgctaatttcagagagaataaagccaatcta  
aatataggcgacatagtcaggtgctatagagacatgagcgcagatccagctgactactctgcaagatctcc

ttagattcatgcttactatcaaatccccgagccccgcccacagaatacccataggaaagattgaagcacc  
ttctgttgtgcttccatcgatgaaagcgtatggtacacgagcatgccctcaagtaaagcaatgtcctaaa  
gataaggagaaatcagtgaaatgtcggaaagtttgccctccccctcccccttacaggcttgctttcacttcc  
ctttccgtagtagtatgactcttctgtccgggtctttcagatcataaacgtgaagaacagctttcgaatt  
gattcatctcggccttagactgctacgggttagctcttgttgtgagagggattcggattagctcaatgcgt  
ttagccgcccgctgaaactcttctcacggtaaacgcgaggggacgcttaactcacgggttacttcgcttat  
tctgagggcctttgttttgatgaaagaggtactgctggcttttgatgagacgggtactgccggactcctt  
aggttgaaggggcaggagatttcatatcggtacatcaactcagctaggagagttttctttccactaaacc  
gaaggagatgggttgactgaaggaaagagtgtcttctcgacttgttagaagccggtacgagttgccctta  
ggatgacccgacggagacttttttgcccaaggcaggtcgaggtgtgatttgccctgggggtgcaataccc  
tttggatgaatccaccctattcttgatccctttctgtaccacaataagatataggtgcaagaaatcgata  
agtgatagttgcagatgagatgttgcaagagatgaaaaggtagagcgtgcaagccatctgttctcgttct  
gctttgaattagctactttcagggagagtggtggggattttcgcccttctgcctccactgcttccactta  
aacttctcctatacggattagcttagtttttccccgaatcgaaagccagtgccggctaatagagacatgcc  
atctatatcctagatgtctaaacagtggtcaaaaagttgacaaaaccgctctttttctgctctatttttg  
atgattccacaacgggcgaagagtagtcttctgacttggttagaagccggtacgagttgccctta  
agtacgagggaaacaaagcccccttttttcattttataaaaaaaatataatccggagaaaaaccttcaaat  
agaatccgaatagaaagaagcattaggggtgagaatgacgccaagtgccccgagtagctatggatccat  
agttaactttcttctcctgcatatgtagggtaagtagtcttctctcgtctagctcacacaaggtgc  
agagtgccgctgttgactcgagttcttgaacaagctctcccacatcaattgtgaattgacgatgcaatg  
ctactattctgcagaagaccgaaagtgccaagaagaaaaattagtgaaagagttttctcgctagacgat  
ctgtagaaaatagagatcatagatctgggtgcgtcttagcatgtaacggactttccccaatcgagaaga  
aatttaatacaatcgaagcactcattgctgacggttaccgctttctaggccaacgcataaaccttactg  
gagtcgagaagatcaagaaaaatgcatccgggtgggtggatcagagctgaatctcattctttttcttct  
tagaagcatacgtcaagtgtagtcaatcaacctatcggcctacaaaggctctccattctatacccc  
tagccctacattaccactcttaccattatcttaaagataagataaggaccaatggcaagcatattcaagt  
cagtcggtcataaaagtagttaaacaagacaattgtaaggctcgaagcctccctattacttcaactga  
aacagaatcaagggagatatgaaagaaatgaaaagaagatgtcagtcctctcacttgaacaagattact  
aataagaaagagaagagaaggaccaacggccagtaagttcatcctatccaccactttaaatagaacacgg  
gaaagggaaataagaaagaataaactgctgacgcagctgaaatgactaaaaaggagaatgtactctcgct  
tttctgctccgaggaatgagagaaggtatccaagtagttagcagagacttcaagaccagcagccgataaga  
aggtcagagtcacaatcgctttctcaattgacactgcgccagaatctaccaccccattcattgactatct  
cacctcacctcccaaagcgagcaagtcgcctatttcagggaaagctaaaagcatgtcgtcccgcctatagt  
cgtagccagttcccttgcaaggccttgattagcaaggaatagagagagcattgaaagtagtaactctcga  
acttgtttctcgagaggttgatgaacacaaactcgactgataaaggagaggtccggaggtattaactagtt  
gatgaggtctcgacgagcagactaaaaggagaggtactgacgtgactcgagtgaaactatattgaggagag  
ggaaggggacttatgtaactatattccgaatccttctccccgtcaaaatctgcctcccttgccataagg  
agagagctctccctagtgaggaatcctttagaactgatgacgtcctagctgtgagctgacccaagagctac  
actgattaggaagcagattccgcacagaagaccaagcaaatctcctcttctagctctacccccaggcttt  
gattactcgactaaaaggagaggaaccccatcgactgaaagaagatacaaaaggaactcgaccacttggtg  
ggagaggttggtgaaacaaactcgactaaaaggagaggtataaaaagaaggaggatataaaacacggccc  
agttcaccaaacataacccgagtagtcttatcgctaaatgggatagataagaaataaatagaaaatatgta  
gagcatataggattaaattatatttggtcattttgtcaactagggaggcaacagtcagctcccccgcta  
caattatatactggagaacaaatgggattgtttttttgcctaaaaataagaggcaattgattaaattaat  
cttatgactcaataaaatgaaagtgccaggeatggcccagcgtaatcgaaattttttaaacctcgtgctgtt  
cttatcagttttgtggactaatttctacgataaaactgaaaaaagtctcaggaaggataagtaataagta  
aaaagatgagtagtgagacagatgattataaaaaatccgtatttaaggcattaaaaagaatggaaaatct  
gcagctttctaaagatgatttgttgggaatggcagaaacatcttgaagaaatgactgtgaattacaatcg  
cgaaccctttctaatcgcagtggttgcatctcctcagaaatctcgattctttttatgtgttctcgctata  
ttgattctctttctttttcttagggaaaccttttatggcctactatctaagggttggggatatacctag  
tagggagtcgagccatctttctttcttgatcatcaagatcggctgggggtctggccttggcaatgggctt  
tgctgtgagggccctcctcgtaccgaagtcocgcatttttttcgggaatatgatgttccgtcccagta  
cctgtaggaaacatagtgacaggctaaagacggcttttctcaacttttgcataccgggtgtctcttttct  
ataaatagatacgaactgaatcttcttaattaataagtcctcccaacgagtaagccaacagctccctgg



accctgaaagctctccatcctcggcaaacctccgaataatgtatagcgtcagcaaaatggatttcagatct  
ttcgaagggagtgctcaccgctggtacgagtaacttatatgaatctagagtgctgccagaagagcataatg  
tgctcgtcgggtgcaaaaacaacctggaactctatcggactttgaaaaggtccaacggttgcaattgactctg  
accataccattcctagaaaatgatttgacaattcgaactcaaattatatacctcgagaagtgtcctcc  
aatcttttcttttggaaatgcctagtgacataggtatgagattgactgtggagtgcaggatcaaccatcac  
tctcttcacagccaccctattcatctctgcttcaacatacatctctctatgtagaaggatattcattata  
ttaggttggattttacttaaaggctgttctgaaggccgaaaaaagagagacttctgacgacccttcca  
cccctagtcctcccttattacgcttgcttggaccctcggccaccagcttttttttttacacaggac  
tactactttacaatctaatttgattgaaagctctcaataaaaattatggatctcccgccatattgaacttt  
ttgtttttccaatacagtcgaggactcttttaagattacttaaaggctcccatttgaggggaagctagc  
tgttcataatccccgcttcaatacctatgcgaatatcggaatcttcttttatccgaaggcgaaagcctc  
ttatataaaagagagggctttatcaacaatgctttctatcttttagagcataagttgaaatggccttct  
gttaaccgcccactccttagatgaaatcagatccttcaaaatcttcttttaattttctatttgctgctgt  
cgagagtttggaataatcatcttgagatatttagctttcgaccacgggaaaagaagctgaaatagtagg  
agtttaccttatagcaggacactcggccgttgacaactcttcttaggttactaatcggtgacttgcttc  
gccaggggaatctatactgtttcatccctgttggttcaggcctcctcttccatcccgtgtttacttac  
attcaaattgagtgcttttttttctccacttgagctcttagttacttagtagcaatttcatgacattgccc  
cactgtaactggacagccaaatcgtacatcctaataattatcccgtacctgaacgaatcatccatgttcg  
caggtcggtaatatgtacggataaagatcggcacatccataaagacttcaagctctatactggcactaag  
ccttagcatacaattccatctttgatactccagataaagcttcatccaccatgcatggtacagagtgt  
ttcattgaatacttccatacctggataggcgaacacctcactaggaggaagttcgactgaaagaagaag  
gaggaaggatagacatgttctgcccataccacaccacctatgtgatgtgatagggcgaaagaggggcccagg  
aagaatagtaccctagtggtgtccagcaacaaagctaacctttgcgggtggaaggctatgtccgggacg  
cccgtcgggtcgttgaatttgctacagcgaacagccatcttctcccgtcccctgtacacgacgaacaaa  
gtcgtccaggaatcgaaggcaccctaaggtcttctgaagcgggcagcaacttctcgagcctgcgcaaaa  
ccactctaaagatgagtagcttagctcattatagagctgtcgtacgggtacctaaacaagattccaattt  
tttaagatggcataaattgattatgaagatagagacgaaggtcccgcgggttcagaatgagcttctgcg  
ccggaagtccccgaatcttactcagtgggcatcataaagagctctaaaggggaggagaagctagcgaatg  
agtcaagcctgaaaagaaagtgaaccgcgaaggcaagtatcctcgcctcccgatgggaactttcaata  
aagcacagtcgagtgctttacctaccagaggtatctatagaatgaaagaaccaagaaaaagggggcatag  
agatttcttctcttatgagattgatagtttgatcgcgggggcgggcccgaggctagcgatcagaaaaga  
aaatcgattctatataatggtatggtaaaagatctgacttctgtagaagaagatgagctgcctaga  
tctttgtatgtacaggtctcggtaattgaagaaagaatgccaggtgattaagcccggtaagaccccgtg  
ataagacatcttccgcaatacaaaataacaacgggggatcctttatcccctgtctcacaccgcctaaca  
tgagaaatataccttttggataaccattaaccaagacagagagcttggcagaggagaggtgctttagcaac  
ccgagtgaaacgagaggaacgagagtgaaacgcactttagtgactagagaacttcttctctagttcaag  
ctaagcccccggaattgaaagaagctcggcgggcgagaccagcttctggctctcttgatcaggccgt  
cgtattttgggtgctatcacatagccctgggagccactcctatagaccagcagaattagatgaacgagct  
aaaagtactattccctttatgacctaaagaagccctacctaccattatatttaataaaaatgaaagtcaa  
gcatttttgccttttatttaattttatctgtcgccttcttctccttatctcgaactcggagaaaag  
agtatctaaatagggctcttagaggactatgccaaagtaaccccagaaattttttaggtggatattttcc  
gtggtaattcacttttattttcatttatgtaaacgggtaagaataatgaaaatataaatggttgctcta  
cccgaactgagcttattcctcggctttgacttccgaagatactcaagtctactctttagcaggggactac  
ttcttttgcgaggggaaatgtgctacttttattgtttattggctgagggattggagtagacctaccttca  
tcataactgggttaagcggatcctgggtactttctttcactgcccgaacttaacttaccttgctcaaaag  
gtactaatccgaactaagaccgctactccaggcatcgggataagaagattaggactttcagccttaact  
tctgttgagaggaagttaggggaagtatggtttcgaatccgaagttaggctagagctgctgtgtctttgg  
aaggttaggtgcccctctgcaacctcttctctttgcctttccttggattctaaagggtagagaagaaaa  
gagggtgcacggatcggatcatctttagttttgggtcaaaagaaagtcttctctgtttcagatatacc  
atctccggacatcaaggaaatgcccaattgttttagccgcctacctatttttaagtgttagtgttgcttg  
ttccttgcttagctctgttttccgataaaaaaaagtaggaagaaagatacaaccttagcttagtatgg  
tgagggtcgtcgagacctcttacatagtgctctatccctataagagcataccaaatgaccatattagca  
taatatttttagcatactatcttctttggaaaatgggtatgatactcaatctagatacccaagggttcaag  
atccatctttcaggttcccttcaagctgtaaggctcgtctgttctcaagctttacttcttgagaacgg

atgaactcttacttattgagacccgccccagttacctctcctctgttcaagggttgaagtactatggtat  
tttcatcgacaattattcacaagggttctggtggatctgaaattagctccgctactctacggacttcctta  
cttagcctttctttcccatttaactaatggaagaattgagccaaaattatcaatgaattgagcgagggtg  
agaaagggtcagtaattgaaattataactatagaaatctgttctcagtgagcttgaatcttttaattggg  
agttgggttaaggattggaggaatgggagttagatctgtccctagttcccctagccctagattaaggttac  
ttgaaacaggagatagagtttttctaaggaggttagctggttagtgatgggaagccagttgtagtcccc  
ttagccctggattgaggttaagagttttagtagggaagaaaggtagagagtagagggagagtcgatttggta  
agttgggttggtaagccagcccttcaacaagggtttcaatggcaacaaaccgctcccaggatgagggc  
aaagaatgggggtggggggacttccagttccggagatagatgttcttctcccctgagaaaaattctctatc  
tattagcgagtttccgctacaatccggctgaaatgaatggaatgaggaaccgggaaatcactatagttg  
tgggaattcgtcggatgtaactcatccggaagtgtggttcgaatccagctcgtgacaaagcctgggtca  
tatgggatggaacaatcttttgattatgaagcggccgctaagaagagatacttaagtgtgtaggaggg  
agctaggagttccattcatgccctctatctatgccgcatcttccatgaacgaaaccaagagggaaagc  
agagaaagcatttagtccattttagtattccggcactctgtatgtgctgctatgatagtaaactcttccctag  
ggaatgaaccgagttagaggcgtatgcttccctgaccgatcaattacatcgaacctcaattccatcgagc  
cttgccttagtctgcctatggttgatagtgaaacagcagatagctacatcaagcactcactttctgtctat  
tggccttagaacactccttcttatggtgttttcaatgaaggggaagtgatccctgagttccttcgcacag  
ggttgaattaaattaagtaagttttgtctacatcttctctgcaattacatcaggaaagaaagcagatac  
tgatgctgaatgcacttaaaaaatcccattgtctgaatgccttaaacttcgattccaaagaaagcagaact  
agactgccaacgatctgacgatagagagtttccacctgtggacctgcttctcgcctaattggtaattcttg  
tcttccctctgtcttccgggatgggatgggtgtccgagtagcagataactaagtagatgtctcacagg  
cgaaggattagacgtcttctgactcacgaagcaggtctacagctttatgttttacctcaggtgtagata  
tttcccacctggacaactttgcgctccgcaaatggtgaaagaataatctaatagtgaaagaaatcctgt  
ataagaaatttattactaaatgcgcttgcttccgctctcagttcagaagaatgttccattgatggacca  
taccattagcctagcagctgcttaagataagaaggcaagaacagtggaagaccggatagacacaaaaaa  
aaagataaaaagagttcagccgcttgacctgaggaatcaagaatcataggcgcggaaggccaatga  
acatcggcttcagaccttaccttagacgtaccctacttcttaaaaatgaacgtagagatgatccaatctc  
tggactggagccccggcttctattttccagcttaataaagataaagatggaagctgttccgcttacc  
tctaacttttcttagtagacactgtattcatttactaaataaagtaatttactactggactccgctcgc  
ttctatagataagagttgaatacactgaaactactcaaaagtatgcttaccgggataactataactag  
taactaaaagtaataagcttgactcctttcaggagtaggtatgcggtcaagcctgttggattcgtttctg  
taacatgattcctcgaaaagtcatattttgattcttgatcttccgatcgtagcgcgaagacatcacctcc  
ttctggtagcatcatcgcaatcacatctcgggttggattatctgaagtgaagaagtatactagaaatagct  
ttctttgtctttgtttgatttgttatgtttgcatgtatggaattcgtaaaaatgaaaatttatgtgaag  
tatcaaacctctatgttttggattctgatccatctcttccaggtactacttttttttagtgctctgttat  
tgagattctcacacttggcataacaggctaggccatccttcttcttaaaaactgctatcctttcagat  
tgactccctactcataagaataaaaagggtcaatcagaccatttgtaaaatctgtcctttggctaaacaaa  
aacacttaccttttaaatctcataataacatttgtgatgaaccttttgatctgattcacattgacattt  
gggcccttttccagttgaaacctcagaacagaagggtttcagatatttttgaaccatagtggtgatcatt  
caagggctacttgggtctatcttctcaaaagtcaaaagtgaggttctcactgtcttcccagggttctaaa  
gctcatagaaactcaatacaaaaagggttagccaaagctgttagagccgataatgctcatgaactcaattt  
cacactcttttttaataaaaaggcattctttcttatcattcttgcctgaaactcctgaacaaaattctg  
ttgttgagaggaacccaaagattcattcctttgttcacaacaactgcccgaagatttttctctctacg  
ttggatgatcgaacttcttagtgtaagcaaaagcactatcaacaaaagttcgtcgtgaagatcagctctc  
ctcaatagtcagataggatcttagacaccggggaccggcttcgcgggatcgccttaaaggacctgatcca  
ctcatggcgaagcttatttgggcgggtgtttcttgatccgatttatcacttgaatgagtcaacctcatt  
tctttcttactaaattcaactatgtattctgattaaagagcttattctcttgattcatgtccacctg  
cctggtaacttaaggatgagtttcaaaattaggaaggatggactgcagatttagaaaagagaatgggga  
gcctcatcaatgaattaatgagtttcttcgcctctcttgggtgatagtagctctttatcagcttatagt  
aggagctgagctcttccgctagcttactagctctggtagttaggctcttccggtcaattctgtgcataaca  
aagaaaaagcttaccgactgctatgattcctaactatctcgactaaaaggagaggaagagctctcgacta  
aaaggagaggaagagctctcgactaaaaggagtggtctcggaaaagcaaaagcagagggagtggtgctg  
acaaggcaccttccgatacttctctcactccaaaccaaagagaagaacaaaaggagctcttccgagaa  
tcccagtagaacctgagtatacatatagatcagaagaacttaccttagggattatacttccccc

cctaacagctaataacagaactaaggaatacagattaaacagagaaagagctcaggtactccccgggtcag  
ttcaatctgagagataagcgattcaaagaccttcattcctctgattaagatcaagctgcattcgacagct  
aggatcattttatcttcccttcttccgttacacaccaatagtttagcctatctccctaataaggata  
agatgctgacgtttgaaagtcaatctttttgacctactaagtaatagctttcattgaagtgagcttactc  
taaataggatctccacagtaggaaaactagacatcaggaaatctattcaatcaagacggttggctaaaga  
catgggatgtgagtatacttttcgagttggtaactcacttctatccctaacttctaaatagaaagattct  
gaggtaggatctccgacattgccagctccctatcccctttttctttcacaaaaagattagattctgtct  
gtctgtatggctatctgaacgacttattcaacctcaactcccgtaccaagaaggatcaaagacgtctgtt  
gttccatcctaaacatcgattgaatgaagtccttctaaattgtaatcattaattggattcgaaccaatat  
atccgcccgactttctcttagtcgatcaatgatgggaagatccagctgggctgcaggatattggccccc  
ctcccacttttcgggtgaaataattgccccctccctcactttttgttgctgtccaaagcgggaatgaaatta  
tactgctgaagtcccctctcagcctttatcataggtagggaaagagcaaatacccggtaagcttcaaagt  
agaaagtcctaggacagaacaggaaaaggttgtatttctatctatatttcaactaacgtacaataactt  
gtcttctccattaatgttataacaagaagaacttctaagagcaaagagaaggtagatagctcagtagctg  
gtcacctagataggctataagccgcaggttaagatatagttcatcgaaggggaataatcatcgattcatct  
taattgtacgtacgacttctgttctatccttccctcgagtcgaaggactattgctctttgctgctattaag  
gtgatagatctgcttagcccatagtaataagatggtagtgaccgcttatcctaagctctccgctggcat  
gggtgtaactgtccttccagagtacctcaaacagtcctcttacgaagcctattcccggccttactctgca  
ttctttctttctgggtgtactaagcaggagcgttcccccttactggctaggcggctagtagatgcttggc  
tttcatctccattccattctgatgataaatgaagaggtgtcggactgggagcagctatcagatcactatac  
caggaggagcctgtttaagaccatagcttttcgaaacctgcaaagagaagaagagtagtaccggggaggt  
tgagacatgactcttttcggttaagtgacctgttagaaagacatccaattgacgaagagtcagccatgg  
tatagagtaagactctcagacgaatagtgataggcttaaccacagggttaatctatcaaaagactctct  
cccaggccgctgatgggcaacgaggcgagccttgtaccgctcaacactgccatcagggatccccttaacc  
cgataagaccacaaactctctgatgatgaggagatgatggtactagttcccagggtgcatggagaaggca  
tcatcttcagcagagatggtggcactaggatctgcatacagaggcttttgggtgtgaggacgtctgtgacca  
atgcaactctgccgacactctcaggaagcacttcaaaagaagcaaggatgaaggggaggttaagcctgtc  
ttcaatcgagaaactaagctagcttaattaactaaactagaggagcgatcagagcggcttactacaaa  
gaaaggctgagatgctttgaccaggcctcagtagctctgaccataccgattctcgctcactgagaacggag  
atccctagttagactcctacggacctcctcagagagagaggagtcctggtgacaggaagatggaggggtt  
aaggcaggtccaggaaggcggctcaactcaactttgactttgctatgcttggctttgttagtatagcaa  
gtttctaaagctgttagcgcgtagctctgtctgctctaaaggaagtcgatttattgattcgtccttctcgg  
atcgtcgtcggctcctttttattgggctctcatgcccggctagacgataagatcaaagtaaccgcttta  
atthaaccaactactctgtaatactgttttaccaccgggttgccatgattcataagcaggaatcgttag  
atcttatctaggatgttggcgtcatcttataagatgaagaagtcagacacatttctcttctcctaagaa  
gtaaggctgacgggctaataagtccccggagcttcaaaaacaggccttttcatgctccgcagaggccaatg  
aacttccgaaagcttcttctgattgagtgaaacataccgagtagttaaagtagggcatggatgggacaa  
gccccttctttactttaagccgagaggggtcgctcgctaactccttagggcggcttcttccactttctac  
ctcttagtcgactaactcaagttcctaaacgagacagcagctaccccgcttgctgtaaaggaaggagtt  
ctgttccggttgacgtcgtctaaactaatacatagttctgaaatagggttaatatggattgaatcatcat  
aatgatgacagctgctaccttcccattagaaacctctatcttcttcttttcttctcgtacgaatctttg  
ctaacttgactgtgttcgacggctgatgaccccaatgtgtgaaatatccacctccatggggatgcgagac  
cgggaacctgttgtcaggaactgagcactttcttgaaagcattgatttgtggtaagactagaagaggag  
attgctctttcgaagctagtcagcgatcaacaaagtaataaaccttttcgagttcttgatttacggcta  
gaaagaaggactagagcttcataccttccggctgttctttcaagatggaaaataattgatctgtaaaggt  
cagctacctacgctccgctaaagaaaggaagaaccgggttagctatacgttccaaacagctaagatatta  
gttatgcttttagcaacagctccgttcagggagggcggggatgaacacacaaacggcaagctacaaagaa  
gggtgaaacaagctacaaaacagatctgactcctacctaaagggcatagaacaaaagagagtcaggtcaa  
agataagagtttagttatgctgggcagttgtcttggaggagcagccgccacagatgaaggagttgcttga  
ggaagatgcttatttatttccataagacctacctcatggcttggcactcttacgaccaacatgggattga  
ttcatacctggagcaacttgacctaatctgtctccttctaattagaaaaggagtcctcgctaagcagag  
gaaactgagaaggcaggtgcaagggctttgatagagagggaaagcagactcgacaaccacagcccagttaa  
ctatttgaatcaggagcttccgatctcatcccttcaatcaccgttactcgatccgaactgaaccattct  
cttgctacttttcttcttcaaaaaaagattggaagtggaaccgatttcccggaaagaggtcttcggctt

gctctgatatgataagaaagtccgctccctctccctgtcaacatacatgggattgagcagccccctatct  
cagaggggtttacccccatggccagtttgccgatgaaagaaacttcagaatgcagcccacatagtcctatcaa  
catacaaggcttttcaatccagtgaaagacaggtcgaaaacttccatatctgataggctgcaaaggtaga  
agaaagtatagtgggcatgggttagaaggtaggttacctgctcgtaagaggcagtcacttagttagag  
gaatgctcatcagaaggataagcaaggtttgatgaattctcctaggtaaagaggtcttctgcactaccac  
tagtagtaaacttcagagaccactactgggcaagtaaaaagaattaattatgcccagcatctgatctgag  
ttggctctagtagcgccttgtagccattctgggtatcgagaggttcttgggaggaagattgtctagacttg  
gagtgctgctaccactaaggtaaccagataagagagtcctcacctaacaagcaagtgctaatagctaaca  
gtaataggaattcaagtaagtaagactccactattaactggaaacaaggaatgaccagcttcagagggat  
ccagcacagattactattcaaccagttggataacagataacaaggggaatagcccggtcaggcaacttctc  
cctctgtgcagcatttgcttcgacagattgaggggggtcgtagatcaggcaacagcagataaatctattga  
atgtccatcagccgtaaaagaagggcagggcaccacaggggctcatcttctaactatagggaaaagaaga  
acaagaagactgtaagacagaaacggaaagagatgcgcgagactaggttgagaatctctgcgagggcagc  
acaccggtaagatagtttaagaatttagctcagtgctgcatcaatgatcttcttatggaaagctga  
agatcaaggccaccatggttcgggttggtcaactcctccaagtagccctaacgaagtaacccttcagggcca  
acggagtagccctgggcgtagcaacccccctgggcctgaggggtgaggggtatctgtcatacgtggaaga  
agaagaacaataagactcggaaccgtagtgaccttcggaactgtgagtgaccttcggttcgagatgcagt  
atgaactcggaagacttgcttcgctagcaccgtatgggataaatcttcatatggaggagaaggaagactg  
aggaactgcacatgcccgtccttgccaagtaaccccccaacggagtagtcctcactgggatgaggggttc  
ggcttgttgctgcttcgcatgagatgaagagttgcttcgctttttaaaccgtagtgtaacccaag  
ggtgtgctagatgatgaggggtgaggggatgggggtcctgcactctatggaaaatgtacttttgtaatag  
tcaaacatttcaattctaaaaatttgatagagttgggtgattatgagtgagggggaagtagcggctaggacct  
ttggccaagtgaaggatcaaccaaagtcgacagagttgggttatgattatggggtttcgaagagaggggtt  
tttgtaatcatgagttgggtgctcagtcagtagattctgagttgagtaggttggtttggatacaagataag  
gatcaagcaataagggcgacattaaactgtcatgtaatcatcatcgatttcacagagtaaggtatagaaaag  
caaaattatgagtcgagtagcagcttgaccctcaacactagtcgacattcaactggcatttaatcttggga  
cgaattcaattccaactaatcggtagaatctagaatagtgagatggaagaccctctccttatcagttt  
cctatggacccttcgactagatcacacgagctactcccacttggtcaactgtgtgatttgctggtttccg  
agattcgggtttcttcttttcttgatccgaggttaaggtgctttttttgatcgatcaacaggtaatatag  
aaggatgagggctgtgatttacctagtgaaatcaacaagatcgaaacacaccaatcgatcaaatcatttttg  
aaaaacttgtagatcgtctgatgtagccttttgcttcgcgatattcaagtttgggtttttgcttcgcgat  
attcaactatgcctatatgagagattgagttcacgacaatcaattccaagtaatcatgtcagtagaattg  
agaaagatgagttgagtagatggatctcccctcggacaagtagcaagcaagatccactgtcatgtaatgatt  
tactaataatagaagaaaccaaattatgtcaatagaatcgagaaagatgagtgaggatcgagttgagct  
tggatcactcctctccttatcagctccttctccttagcgcagcaaagcagcccgaagcacttctttctt  
tctctagcgcagcagataggtcgccataaccctttgcccattgggtgtgctgcttcaattcctagcgaagca  
agtgtgggttctctttgggtccgtagtccttttactctgaaatgatattaggttggattttacttaaggct  
gttccgaaaaaagagagacttctaggctcgcaataaagctaaggtcctgatcgagcaactagtcgtccta  
tctatccacctctccataataataggatccaccaattcttctgcgagagctactgtaccgcaacagtaga  
aggggtgggttaattatgggtgtctactgatataataggaaacatgtccagaactggcactcctggcagaac  
gtcgttatctgcagaattcgtggaactggcaaaaagtagattcagatttctctgtcgtcgcatagcttat  
cccatttttttaataataggatccaccaattcttctgcgagagctactgtaccgcaacactagaaggggt  
ggttaattatgggtgtctactgatataataggaaacatgtccagaataggcactcctggcagaacgtcgtt  
agttccggaattcgtggaactgcaaaaagtagatttggcttttgaggcatgattagattaattgatttc  
aacaatatgattccctccagacagcttacgtcaagcctctaggagtaacaactataaaaagttgtgggtg  
gttgttgaccaacaaaaacatggtagaaaaccaaagaacagggggcatagagatttcttctcttatgagat  
tgatagtttgatggggggcccgaggctagcgcagaaaacctaataatcagacaatgatagagcggccg  
taccctacctgaagtagcatcccgcgcatctttcgaataaaacaaaaggatcaactaatacaaggattgag  
aatcttggcaactcaacagaaacgggattgagggaaacttgactttattgaaatcagagcagcgaaccg  
ataaacacctcaataggatcgctaataactaccacttctagacttggcacagacaacacttcttttctata  
tacttaattcaagatgaaagcaatgaatgattgatccaacacgccaagccatacttttcttcttattac  
tatacttaatttatctaggtgatcgacggaacacggagaggtgctttagtcaggacgaggggatttagac  
ggaactgagaggagaaccgaatgaatgcaagtgcaagagtggaagattgatcggactctctacgaaagct  
gtccttcttctcgcacaaacatatccgactcgtacgaaacaaaagattgaaccttcacccaaaaccgtac

gaagcggagtagcaaagatgacagcagcgaagcagccgtagaaagaaagttgacagatcaggagcggaa  
agactctactgatgattcccaagccagctgtacaaaacatagattacagattaatcaggatggaacacga  
aagaaagaatatactgaaatgatgattagcacaaaaggcagtgctcgtaccgaaacaaatctacagcactt  
tgaccaagcattactcctccactttctactgatgattagcacaaaaggagcagtttggcatacaaaaactga  
ttagcagcacaaggatcaggagcagaagcaggatggagtctcaatattgaaatgattagcacattgatc  
acgggatggagtcaagtacgaaactccacacttgcacacgctctatggaaacaaaagccctcacacaac  
tgatcagtagcacatcactcaagtacaaaactcatactttcacattcttctttatttttagttatcacatt  
atcgcaaaagcacgaaacgactgatcagcacaaatcgtacacagaagcactaatacacttatgccccgaagc  
aggtcacaggtccgaagcaggactctccctcccttcccgactgataaaatggacttaattacgaaagaa  
agaaaaagaaataagattccctacacaggtgcagtaaccattggagcattatcactatctgtactgaacc  
ataatccactgaccaaggaaagaaagattacagcaccaagccgtacgagaagccaagacgctttacgctcg  
attagtcaaggtcaaggtgccgatgaataaacaacacgctcactcgccttaaaacccctgtaagcat  
accgaaacccccaacctcgaggaaaaggtgcaaaggtgctttatcaacaggacgaggaacatctgaatgac  
atggatcagcagcaggcgcagagtggaaagattgatcaggagccaggagctgaagagtctactgatgaaca  
caaagattgataaatagcattactcgtatgaaagaaacccaagccaaaacaaaggaaataataagattga  
tggaaccaatcattactcctccactttcccgtttactgaaatggattagcacaagatagcagtatgcaa  
agaatatactatactgattagcagcacaagatagcacggtggagttaacaacgccaagcctacgcacaa  
caagaaggaaacagtgaaagctgccaagcatcagcattaccataaatgtgagtttaactgcaaggaaaga  
gaaggaataaaaagacaggtcttcaaaggaacaatgatcggacgaaggtctcgaaatggcacagtaacaaa  
ggaacaactgtgctggactcagcacctaccataggtcaacgctcttccgagaataagtctggggaagatg  
tctaggcataagcagcaccggctcataagtaaaacaaatgttgcttaaggagccaatacaacacaatcaga  
ggactactttacgcttgagagggccgatcagctcataccaacaaaacaaagaagatggcaatgctgtgga  
gtaaaccggcagtaagtaaaatcctgggaaaggtcggtagcacaccggaggcaacaaagaaagataggt  
gctttagcaactcgaccaagaggagaggaagagacggacgatcggacaaaggaaaagtgctggactcaga  
agaagactcgactaatcaaaacacttggaaacagctcgtacaaaacaaagaggcacttggaaagggaccac  
cggctctatgcctctccttatagagtttctacgaaccttgggtatcggctcatagctattgttcattggtaa  
tcggatagctggtaaaagagctgataaaaggaacggggaacagcaacaaaagaccaagggctcactgggcca  
acggagtagtcccttgagggtaatggttcaaagaaaagaaataaaggaagcggctgacttaccgagtcga  
gcaacaaagatgtgctgggtagtcaactctccatatacagaaggaaccgatcaaagcatcggaagaata  
ggattctagatgacctgtccttctactgctctgctcgtttggctgcttatcttgccggattctgattcaat  
tagatcaaggattgccaagcaaagcagcaccaacctagctctactctagctaatcaatcatggcctactt  
ctaactgtaaatgtgatcaccagcatcacaacaaacagaagcgggtatcgaaataagcacctgtcccaa  
ctcaagcctgatatccctggcacaacagagtttgagacttcgcccggataagcccgatattgagcctatct  
gactgagccttagccagagatgaagggcttggcaccaccctaacgcagtaaatgaagcgatattcccttga  
gcgaaagctttattttgggcatctacaggagaagtgcgttatggaaagaaacagaagcctagctgctaac  
aaagacctatgcggcttgcttggggtagtgggagcatttaatcgagaaagaaggtcttgagtaaca  
gagtcacatatagagacttctgtcggagtgtgtggaaagactttcgtccgcataagcaaaagatgattgc  
tgctcaagactgggaggaagtaagggagaaagagagaaggttgccgctaggagagtggtgaagctata  
gatttatttagtagagactaggagtctctaacttactgtgctttggccgaggggtgaagtcaaaagata  
tcagagggctgccctttcttcttagagaccgagtcaataaagctcctccaaactgacctgatctattgt  
ttgagtctaaccgagaagtctcatcgctttgagcctgggttagggcatacgcctatagagtagcccagc  
ccgaccaatcatcagtgtagtggtccaaggaatcaaggctttatggccaatgaagaggtgggctatga  
aggaatggaaaagcaggggttggtgcttggtgctgcataacttacttctacattcctcagattaccaggagt  
gtgctggaatgagaaagtgaagtattccttgggcaaaaatagtcaactcttactttgcttgggtagggc  
tttgcaacacaccgatattcccttcttcttaggggtgatggttccttagacctgtacacatgtaattataa  
ggctgcttacgcttaataatcaaaataagcggaaagcactcttgaaaatctcaggtttactgcttagat  
caattcatactgaaatgcattaccctacctatctaaaaaaaatagggccctggggagcatgccaccctc  
aaccacaaaactccattctcctcagctctcccagtatggagacctacttactacatctcgaccgggggc  
ctctccagctcttcttaacaacttttctatactcagctcgacgtaatgcccgggcatcactgatgggtc  
ccaagcccctgagctcatcaatgaacggattccacctttcacagcgagctgttccgaagtggccctga  
gcacagtgaaatgctcttacggctcatctatagcgtgctcccagtcgtcatgtagagccaactggagagc  
acgcttgacatcctctggatcccagagagttactccacgttgatgcaagagaatttgggctttccgtacc  
atggccgctccaaattctcgagggcgtcgtgatagctctcactcggcagagatgcggctcgtgctctt  
gtgcccagcctccctttcccaagcctgctcctcaggaatcgggtgattgaccgacgagggaggtacgcc

ggaactggccgaatcttgcaccatatcggatgtatcgtgaaccactcagacgaggccccgtcttggtga  
ttcactatccccccgatgaaccggtaactgaaaatgtgccataaagacagtaaatatccgcggaga  
atgtaccaaaccgccaagatatggctacgtagaagaacgagaaaggaggagatttgacaaacaagggc  
tagatagcaccattgtgtcatcctctttcctaataactgctttaaggatctaaataggcaaattgaaaa  
accaatagaatcaagaagattataagattgaaacgggaacgcttggttagactgaagaccaactgaatct  
cgacaaagagaagtagcaagcaagtagatcattcgacgtcagagggaatgactcgtagctaggggccatc  
tctcttcgattattcaatttgatccgtcttctcttcttcttatagaaattgatagtttggtgagatcgatta  
ctcataaatgctgoccttctcttataatacgagagcaccagatacaccatggatggatacatacgtttca  
cttatcccaaaagttaaagatcttatctgtatctctgatcgaggaaagaaggcgagctagtccaactcaatg  
acaacctctagggccaagcctatggaaagcttttcctaactcctctccgcatctcttcttaatatgctt  
gtatcacataccaataagacataggaggatccgatagatctcaatcacataccaataagacataggagt  
cgttccgaacagataagatgttagttggctatcaatcttctttagcacgagtcgatccctattctctctat  
agttggtgagaactatgacttgaacctgctcttacttcaatcttcttttcaattcagatatggatggta  
aagtccattcagatatagatggtaaaggaagatcaagttactcggctagaccattatccaagaatggaa  
agctaaagcaagtcaagaatcagctccataattgaatggcatcgctcctttcttcccccatgaattgct  
ttctctcgtactcatgcatcccgctccgaccttcttacttgaactcctgggttttgatgctgtgacttc  
ccccatgaattgcttttctctcttctcttcttctgctttctcgtgctgcaactccttctcttattagaggg  
ctctcacggctcctatggttgaggagcgttgggcccattctaagttggagcgaactcctccggaagaattcc  
tttgaagaaagatccaagcactcaacttgattggagaagttagcgaagaggtcgcgagagcaaggcgttg  
agcggatcgacttttgctttcccctaataatctgaaggggaacgggtgagaatgaagtccaggtaaccac  
agctcctttctgtttcagtgggggttcagtcctaatgagaaatgaggggtgatcatcgatctgtagcgaat  
cttttctgccaattgactttcttctgctcttccgctctaaagcattgggttaagttggtgagtctaagtcta  
aagagtggggcgtagcgaattgactatttgatctctttagcttgaaataggcgcctgaggtctgtctga  
gtatgtaaaagatgtggtggataggataagaaagaaaccttctacatcagctaatcttctctccacgagg  
gactcaataaaaggaggatcggtttctttccgcttatcgatataatgagcagatcaagccttcccttca  
tgcactagatggatcacttacaatgaccaatactcctcgtgagaatctaaggcgccttaaggaagcatctc  
gaatcgggcgtgaaaaagatccatctttgatattttcacacaatctcgcaatgtcaacttgctcgatgt  
aggcttgctcccattctccacggtttaaaggcaagattggtgggaaagggatattctcgcacgattac  
aatgaaatattctctgtagccgacatatggtccagttcgccaatagtatccatcgttcacagctctgcc  
cctttttggggggccaccagcagtttactgttaaggacactatcgacttactgtgatatgtctacagtc  
aaaagctagtactttatgggtagcatctttagggactcagagatcaggaaaacttgatagaaagccctag  
ctctaacttgatagaatgccccagcaatggccatcggagaggtccaacgtaattttactcttataaaa  
gagggaaactcgactgaaatttctactttcaactaaagctaaggagattcgggatgggaaaccgcactctt  
tgactgagagggcgtaggagatagggagttccccgtaatccgaaatagattttagtacagaggccggccga  
ccccaaagtcctccaagttactcactcctttcaacgctccaaggggcattaaagacatagagatcttggaa  
ccaaggtgtcctcctatggaaggaataagacctgaaacaagacccccaaaaaagggtctttatgggacc  
tttgcaaggctcgctcgctctgggctttgggttcaacgggtcgctttgaaaaataaatagtctcatcacat  
ctaagggtgcaaagattgacctcgatgcatgtcaaattttgaaatgcctcatgacctatggttcggctcgtg  
aaaaccaccaaagggtgggtgggttgagatcttaaggaagaaataaccgaccagtcgaaaggcctttggt  
ccgaccgcacttgcggatccgggtttgggagaacctccttcgcccggtgagtttctacatcagctcgt  
gtttttctcctctcgtttgactcgagttgcctttaaagtccttaatacacaatgagataggtgggttaatt  
gtctttctttcggatgagctaattgaaatcagatgaagatagagatcagttcagttcattcctgtaaa  
caaagacgacattccattaaagatagagtggtcgaccttcaaccaggacgggtgggtgacctaaagc  
aaaggcgtcttatcaaggccctgcccctccctctttagttgtgacaagggtggtgcttatgattctac  
ttggttgctaattattcttctgtcaaccttcttctcatacgaatttcaaaagaaagaagtagagtcgt  
tggaaccaacaaccgccaggataaaatctgtgtgagcggggcaaagacacctggttggtttccgagggcgt  
tgcaaccatcatccttggaaccggaatatagagttcttccctgggtacctggaggatggagaagagaaggc  
attgtctttccttgatggaaaactctatggtatagctatcattaacggaggaaattatccttccgcact  
tgatctttctagggctattttcactaagccgaatctgtggactgagttggctaaactattctaggagtgggg  
ctcttcttgtatcgagaaaaatcttttgttaacagttcaaacctcctggcaccatcccctgaataagggg  
ctgggggaggttgacaccctccagatcacttgagcacaagctttaaaggagcaatagttggtcctgc  
taacgaggtactatgcccggtgggtggactttcttaccaagtggcaacacagagggtttggtcagaaag  
ctgataaggggtatgacaacctacggattaggcaatacctaatttactgggtcttctcgtcagagccgggc  
ccgctccatcacgtggcgtttgtccacgggtcaaggagagtagaacggcggggcttctcttagtgttt

gtggtacataccaaaagggttgtcattttataccgattgatatggccttcaatttgtttaccacattcac  
cgagaggctccgcttggctctctggcgcagtggttttgaagacactcggctactccggcgttccctcatt  
cggatcgccttagtggctactgggctcgttagtaagaatcagcgattggttgtcacgctcttagcaggca  
aagtacttagaatgtacaagacatcgcgggacccttgtttgcgtattattgtaagtctgccttacttag  
tatttatttccgaccgactccatcgctaagtogaatagaagcaaagaccttggaaagaaaagatcttt  
caccggattccaggaaaatgagctgccattgtgaaccgctaccataccagaccagatttgacagacaag  
ctccgttgcaagagtattccatctatccaaaatcccgcaaacgcttggagttggatccacaacaaaactc  
aacctggtcgtccagcacgataaattttgaacttacaccgaatcgcgaaatcccgtgcaattgagatttt  
ctagttgaattcattcacaaaacccccgggaatttttagatgaatcactccataacgaaaagtgctaaggct  
ctctcatttactatttgcgtaagttagttttttatataaaaagagggcaaaactgtatgaaaagtgtcta  
aaactcgtcttttttcggtactttgaccgggatgtaagatgtattttataaccttgtctgatgctgacc  
acatgcatttaggcaactgttcagctattactcacggtatctcactcgtcgatggagaacctcaccctcag  
gctcaaaaatcgtcgttcttacgctttcgggggtctccctctctacagtgaggttctggttgaagttatg  
attgagacaatgagtcacaggtctttcttttattcccttggaaatctaaacctgagaatcacacagcct  
ttctcttagggcaacaggggaacaaggaaccagggaaagaccaacacaacttccctgacttccctaggctt  
agaaacccattccataaacgggaaaagcttactaaccttacaactctggaagggattactttcttacca  
actgacatggcttacctggcttaccttactaacactaacaaacattccctgggattacttccctgacaggg  
cttagcttacttactaaccttcccttacacggaattacaggggaagccaacaccgggatgttccgagtgaa  
agtagaagtttaaccggaactgtcgaagattactacagaagaaccataagatgtcccttacatatacc  
gatgtaaacaaaagatctgaacgattgagagaaggaagatagagagtatgataggggaaaggaatagcagta  
gagctcttatataccaaattcaaacggttatccctcctaggctagtaaacctagtccggaatgaagagtacg  
ggagaaggaagacagattaggagagtggtcagtggaatacaagagaccaacagttcttcggaagcagaag  
gaaagaaagcaggagaaacacaaactgaccgagctagcagatgttccctattaggcttggagaactactcgg  
aggatgaaagaaagagacaggggaacaaagcacagtatcacctactagagctgctaaccgggtattccctc  
ggtggttccgctcctttaagcctggaaaacaccgggaaccagagcatgaaataacctttctttttgtatg  
actgagaggaacagttcgggcactccaacccttctttgtgtgttgctgaactgcttccctgaactccgaga  
cccttgccttcccaagtccggatcgactcttcagagaggtggaggtacaaaggaaaaaacactggaaggag  
aggtagtttactggctagagagagtcagaaagcagtttagtaaggtagtttacaggcttcttcccttct  
tcaatgcttgagggacttcttacagaaaaagaaaagataaggcttgcagacctattagtccaggaattgg  
cgttccctcggggatgaaaaggaattgatctgacccaatctattgatccggacgggactacgaaagattga  
ctttcttccctcagcttgaaagcgggaaagaaaggaatagacagaagaaagtattagagaggaataagcg  
agtgtcagagtagtcctaacctcagttgaccgatgatgggttctgctgggttcttacttgaatctcttgcct  
tgagaataatacttcaaaaaaatgcttttattcttgcgatgtcaccactcgttttatatatagtataggac  
tagaccaactttcgccaatcttcgaccgctggcgtatatgaagcacgttttctccgctccctacctccct  
gcaccggccatggatcaagacttctttctgggttctcctccggcacaggaaagtaggttctggtctctcc  
gtctcctttcttgatgaagtaaggattcatttattttgtgtctagtccagtagtacttggagaacccttgg  
aatgcttttctattttcattcagcgtacgccccttgtgccaacccttttctcgtctaataaagaaagga  
gtcccgggcccctacctctactgaatggacttctacagctaacgatccctgctaacagccggccttacctt  
atcaggcagtgggccgctcatgactttatctcaaaggatgtaataggagctaatggaagaaggataatgtg  
atcaatctccagtcctttacaccctcctgactatgccccttgtggtcaactgagtcgtgcagcacatctt  
ttcgtatcttgacttggtagtactctccttttctaattcatctgtaagcaggtttgagcgttttgaccat  
ctataaaaagcgaatcttccctactcctacacctctcctgtgctgtggggcttggctgctgagaatatcta  
tcttgttcatgtccctgcccgggatttcttcccttggctgtagcttcgctccttgggtctactcccgttt  
ttctggaaggttctacctagatgcccggaggaaccattcccttcggttgatgttgtagctttcgttgttta  
gagggcgcagtaatggggcagctaatlaattgcatagtagtgctgctgttccctgcaagcacgaagtcgcg  
gctgtagcttctgtcatttcattagtattcctcttctcctccgttgggaataggttgcatlaagggaca  
ggtatgtaggcttttagccggcttctccctgtgcttacatgggggtttattgcagctatccctcgcatttg  
tagctcttgagcagccaagctctaatcaatagggttctaaagtgcacttcgtctcgttatctgtgttagg  
tttgtaaacctaagggtgacttcccagggaacgcccagttagtgcactaaagggagaggaacgcctatcta  
cggtttaagcagctcaatctcactctctcgtccagaacaacttctttgggttacttttctgtacatgga  
ggggcggagcgggttctgttaggttgttttattggattgcaactgggcattcactgcgagctcttccgagga  
acccttgaacaaacaaaaaaagggttaattagttctgttttaacagacccttgttccatagctgctcc  
ctatctcgttaagctacctaacaacagctctcgtctatctcgttaacttactgacgacctacctaactt  
ttctctctcaataactctctcgtctagggcatccgcgctgagaatgctgtaagctccctctcctctcta

gacaagtgcttgagtcacgacttcgcccctctccttttcagtcgagttgctaaagcacctctcgccaagac  
gtcttttccagtgatcatcttgctttccgaattcgttagattgccaccagttcgggattttatcca  
ctcgataggaacgatcttcaaagaagacacctctcccgttctgtgactcagcttcatcgtacaagga  
cttttagctcatcattccacttcgactggtaggggttttctattagtgacttcggtaggaataagtctt  
cctcttttcttccggaaggagaaaaagatgcttcatttggtccctcggatcggtaaataccgaattcgtg  
acccaaactctatctagtttagttacatcaaaggtggctgccgaataaaaggggaaactttgcctgccag  
attgccttcggtaaccctaaccagttatcaaaagaaggcgccgggttcggctttcaagagaggggagcga  
gctacacatagtgaaagcagatcgcgatgaacacgaaggctttgatgaaaggaaaattgacatttcaagt  
aggtaaagtagggcgcttaggctggctgaaaacagataaaggagacatcatgtgcttgagcaggttctc  
cgaggaatgccttagacggatgaatcccgttggtaaatacggagctttcgatttttaggaacttcttcta  
gttagtagcgatgaattagaatgagaggatccatccaaattggggagaaagagacgatccgacgaaagc  
aagatctatgataatagattcagatggatttctctgttaggtaagtttagcttgagcttgatcaggatc  
caatctgactatataattttgaaacatttgtgagatgccaaagagagttcgaacaagggtttgaaatcaac  
aggatctaactctactgctaccctcgaaatggaattggtaggaatggaatgccgtgaaccaggattagg  
cctcgttagctcgcttactcttagtatagcaggtaaccaacttcttccctttatggctagctttgat  
tcactcagaaagaagaaatgataggaccttgattctgtcaaaaagtgagtcattttcctcctcaaaacc  
tataccccgtaagccatctagcccccttttccattacgtaagcagttcgaagcttcaatgtattacatt  
ccttcatccggggaggttttcatagcctaaacagaatggaaatcataggtctctccgtagtacctttag  
cgctcagttcgggaagtagatttcttctcgttccctcagttgcagcaaggacttatttagctcttctttag  
tctctatggcttggtaggtgtccaattcactctaggcctctcacgtcggtagctatccgtagatcacta  
ttggacgatcttcatcttctccgaattatactcttcttctatcttgttgcggggaagttcagtcatat  
agaaggtctaatacagcagcagttccaatcccagcctgcctaggcatcgaagaaaacatatacctatcca  
tgttatcgcactcgaaacctatgctagctcatgttgttggatatacaccttcaaccgcagggccggaggcg  
cctactaactctgtctcgtcccaggctttcaacagcaggggactaatggacctctcccagcaacagcctt  
tgatgatcttccctccgcaaagccggtatttccactgcaagtcagattttccttttgatcgtaaccgggat  
tcgaccaagtcaactgcctttcctgaagcagatgaaacggcagatatttgaacaacaaactaaggaaagta  
acattccgagtacaaagttgactaatttgctcagttgcactgtgaaaaggtaccggaaggaagaatgaa  
agctaaacagcttggagttccattccgaacggagagagatagattcaacagagggctttcctaggaaaa  
gagaggggatataattgaaaagagagcagaaatccattacaagctgtaaaacagagcttacaacagttgt  
atcgcagtgagcagagtaagcaacattcataagaagaagaaaaggggttttttccctaacaagccagcttg  
tgtcggcagttagcaacaaatgcatgacaaatccattcgttggcaggagagacaggatgcaacaggtat  
tccgtagagaaggtataaatctatactattattcaacaacaaagaagttctctcttgactcttggta  
cctgcctcagctgcacctactcgaagcaaaaggaaacaagaaaagcaaggcagctacggaccaatacttc  
atacatccttcccggacgagacaagaaagggatcttacagacaggaagcaccgcccggaaacagcaacaac  
tacaacgacgggtaactcgtcggaaaaaagaagtcacaactagatcaagacctaaaggagacttcgagcac  
acatcttccctatcacggctcactaactaagaaagactctctagtaatgacagagcagctagccgctcaatc  
gtgccttacctcagtagatgcatacgcacaaccgggaaggcactccttccctacaacttgtttacttagg  
aatcacagctacgccagcaatctatctcatcaagctacgtagaaccaggagaggagtgactcttaactgt  
gctctagcaacaagccagctagcccttatagtgcggtcctcgggactgacgtgactcttccacttgaccg  
atgaggtgaaggagtgagaactcttactataacagaagagaaaaaacaacagttcccaaggaagaaca  
gtgaaacacagcaacaacccgggaaggatctatacactaataggcctactggcggtcctcgtattgaaag  
acaagttagcaaccgtactactggatgaattgagatattgcagactagtgctaagccatagcaacaaga  
ctgctattatcagatagctaggacttattctacagctctttcacacaagggaacgtatggggatatac  
agagaaagtttatagttctgacttctgccttaaaagcagattcaagagacaagatccaattccttcag  
cctattcacagcggatgaagtaatagcattgtacaattagaacttcatacctttttcttgcttcttgtt  
cttaagccagttacatactttattcgcgggggggttccctccttttagtcgagtatgtaacaacctcgg  
aacaatatcatgcatacataggaaccggcttcgctaacccttcttacttagtcgtgaaacaactgttc  
ccatcgaacgtagagagatagtcfaatgacaaagaaaggaaagcagacctcggaaacgcgctgcacagcac  
ggaacagccattacatcagtgatcggcaacaaagatagatacttaacagcagctacaagcaacaatagc  
tacaccgcctagggaccactccagaagtaagctgcgattaaccagctcacttccctcattcgatagggg  
agacaacctgcagggatacatgcatgaacaggaatactgctacgcttacctacctgaccattcatgcaac  
aacttactcacataccaacaagggatagatttctactgaagctgcaagcaacaggaactagtgcgctt  
agctacggtagttcgcaggccgttcttactacctccatacatgcttcacacagaaacaactgctgtgca  
tacacagaaacaaggcagctatgcacactaactaaccattcctatcgatagaatacaagtaatggcagat



aggaaggatagtataaggtagggacagatagatagaataatacgtatataatcagaaggctgcttagagg  
agtgatctagctctctaactcactaaactaaacaaagtggaattgaataagagaaagagat  
tcgttggataagttgagaacaaagtggttcacaaccacttctatgcttccctcggacgctaataacgaag  
caactacagaatctcaaatatgaaaaataggttcgactgttggtcgtaagcttctatcttctt  
cattttcattcctttcgtttgaaagggccgcagaaaaagattatctatctctttttggcttttccatgg  
ggttcgtgggatctttgatccggatcgaagtcacccactagtggggggtctggctttgccgctgttggg  
acctttggctcttgaatgcaataggggggcaagcacttcttctaccggcccttccgggtcgggcagtct  
tccatgtgggaggaagattcctttgaactgggagttctcgaggaatccgactccccccggcaggggggt  
cccgaacggaagaggggggaaccctcggtaaatcagggcagtcacctcccgtcccaaacggaagaggggga  
accctcggtaaatcaagtgccccaggaagctgggctcgcctccagctaataccagtcctcccgggggg  
gaggaagctgggcccagtagtcccctatccatacaggagggatgaaatgattgggggggatagcgtagagg  
cgatagaacgccccttctggcgaataccccgaaggctctccctctgaggagatcatagagatggcccg  
aatagaggccgaagatctattcgagatcaaagcccaaatcatccaacggatggctctatatgaccaacc  
ggcgtatggatggcgcgtggggctcgggcccctcgataatccgaggaccactagtggggaagagtccttgg  
agcgtctttatgatataatggaaggacctccaagaaaccgggcccctctcggacgagtttctcgtttaca  
agagaaagtattcctcaagaaaggcggcccctgggggggaccctatcgcataaggctctgcaagcctttaag  
gttcgaaatcatcaatgagagcaggctatcgcttccctccttaccctctcatcgactgctggtagttggct  
gacttggttgatggctttatgtcatatgtgtgccaaagttaggaaggtagaccgactaattgaaaggctt  
tttcgttgagaatagttgaaagtcccttctttagtagcatgttaagttatttccctccttagcttatgaa  
tttttttagggaaaagaatgagaaaagtgacagtggaaggaggaaagctccttattttaccgcttcta  
aaagaagctcgattaaagcaggaagaccttgggtctcctgttctctagcttagtcagttagtggtatccgt  
cggtcggttagcagatttgcagatagaaaaggctagccagcctaagccgatcccaggaaaggggctata  
ggattgcccacgacaagcattggatttttttgatgatctccgactcctaagctctccgcgtgcctta  
ttccaccctcaaaaaacgattttcgtagtttatcagcccgtcttgccctcacacttctacttcaggagctt  
gccttgagggtacgatgacgatcttagtcggaataactgcttcagggtgggaatgaatagaaggccggtg  
ctaaacgcccgaatgctatttatacgaagactgatcgaaccaatgaagtaaggctttttaactactt  
tcaaaggtagaggcaaaaagccacttttttagcgacatgatagcatgaactcttccccgatgtaaacat  
ttcctgcctaacagatttgtagacgtccaggaagcttaagatcttaacaagaaagataaaggcgatggc  
gtcgccaattgcatgaaagaaaggccttttaggggagttggctcgtgtgtggagtgaaatcctctgtcct  
gtgtgcggaaggcatatgaagtagtcaggaaggattcaagtcagggtgtatgtggattttgcaactcgg  
aaattatcatagattgatgatcctttccttaccctactgcctatcaacattaaaaatgcaaaatagcc  
cttataaaatataaccaaccgatctacgagtggtatgtcctttttttcatcggcgatcttcataga  
gttgccgaagccagaaaaatctgctaatacgaatccgcagaattacatcagatcaagggtgtggatctatctc  
gaacaagtgatatacagaagaagccattcgttacttctccaacctgtttcagttttcaccggtgaacca  
cactcgagcctctatctcatccttcgctctcttatcgacttcatcagatgctccaactagatgcaagcg  
aatcttctgcaacaggttaactacggaggagattccaaatgtccttttcagcatgccgctcgacaaatcc  
cctggctcggatgggtttccagctgacttttacagatctaacttgggatattggttggcccggactttggtg  
ttcaactaaaagaaagacgctaataaaataaaggctccgatctgatgtttacgatttggtgtggttaat  
cttccaattgactaagtgcaagttagaacatggtagcttctgattcacggccaatgagactccgcttgc  
gagctgaactctttttggcatcattcgcagtgagagaagagagcatacgcaggaagaaggagtgggctt  
atatttcaaagtataataaaggatttctaaaatcaagattatcccgacgtgagcagtcacgctggaatat  
aatagatgatacaacttctatggctttctttgagaatttgctctcttaatccagtttttcatactttc  
ttattttacgggaggagagacgggagaagatctttctttcacattggttgggttttttcgctctatcgatac  
ggggttacatattcttttatgggaaagcttttagctaccgaaaaggatccgagcaagctcatcttctag  
aatcaaatcacatcgaagaaaggtagcactggaaggcagagtaactcaatttttttatctttgtgcaagt  
aatgatcgtgtcagcatctttgggttaactgatcagttaccgatcaatctggccctaggttccctagct  
ccaacgcccgaaggactctcatttcgtccagatctttgctttgcccgatctccaactgtaagctctgatgg  
accaacacttatgcatgagattcaagcttccataaatgagaaagttcgagtcattacacaagcaaaagga  
tagctataacgagaaaaaggtattttattttgctaatacccagggggaatgtgaaatgtggaatgaatcag  
gaaatagtcgctacttttatccaagaataaggcctacaagctctctgtttggagacagaacaacggtat  
aagttctgagtcgtatgaaaactagcgggttgggggaaatagcgatttatcaataacatagaataaaca  
gcttgcttggcagactggaagataaaggcaagcagcaacatagagtacctgacctgctcgtggggaca  
taaggattgacatgtgcccagacagctgtcccgggattaaaggaatccgcaaaggctaatgccataagac  
gagcaagactaaagaaagagaagatcggctcctcgtccactcgaaagctttttctcatcatagggggacg

gagacgggttagtcagcattccactaccaacgagcagcaaactccttgcgactctaattgagaaaaataa  
acatcatccttcagtcgagcggcattccagaacgaattcttatcgcttagcacaagcgtaaccctga  
caaggccctacatcgcatatgcagttggagtggttagtcgatcatgcaaaatccaaagaaacctcactt  
tcgacgaatattgaggtacatgaaaggaagacttgactatggctctctgtataagaaaggagaacagtg  
aagatagttggctattgtgacgccgactatgctgggtgatcacgacacgcgctgatcaacaactggaaacg  
tggtcaggcttgggttaggagcagtttgtctttgaaaagtaagcgggtgttttagccgtaacccttgttgg  
aagagaataccacgtaggagtttccactccggaagctctcattaattagttgatgaggggaagcgactga  
cagcagtcaccaggcttggatcttttttatctcatcgaaatcggaagatttgaaagcggaaagaagattc  
tagccttccctccatattaaaagatcaaggaaggaccttccattcacactctgattgacgctaccggctc  
cactcaaagcttgaaggatgaagaggccgacctctgtttttgaacaagttgggtcaaggctcgttatctta  
agcattcctgttggaaacgactagctggaaaggcactaacgctttgccgagttatgataggggatgagga  
gaacagacagagatgggtcatacagacttctttatcagaccgactgctgatcgcttcaaacgactcttcc  
agtcgctgacctacctcgaggagtgactctttatatgggtgttagctgagggaaagaaggtgttatggcc  
tgcccgagaaggagattaaggctctttttatggcagtgagaaagtgatgaggatgaagtgcttctacta  
tggtgattcgggtgaagagggcgttaagcctagtgaattcttgttgagatttggttagaccttgcaatgta  
gctacttctgactatggtccccctcctaactccttctaccactactgagcataaaaactctatctgtatgtg  
aggatgagtagactaaattccttcagatcaagcagcaagtaactctgttccctactgcatcgccctacctt  
tctagggccttgagttgggatacgggttctagttccaaaccctctattcattcgtttgttagccgtgggtc  
acattcattcctgctgtttgtcggtagtcttctcggtttatcctatgtaataagaggtaaaagtagtagg  
agcgagaccggttgtagctagagcagtcattcctttatcgataaagtggtaatgaagggctctgtagtaag  
caacaaaaccagagaaaggctgacttctatttcaactgaaacaggcttggctggaagatcttttattaa  
gtcagactggctagaagcgctatagactgaccggttagaagtcattgatagggatggtgaacactatcaat  
tacttctcttttagtaccggtataacatcgactactaaaagttagaagggaaagaaggttatccagccactt  
cttttgggtccgggataggaggcttgggtgaatcagacgaaataggacatcgggtgccggtactcgattcgaa  
gcatggctggacgccgactcctggcacctaaagggtgcttttttcgctactcttttttgtgattccc  
ggtaggggcaagggcttccctgtctcagaggcccttcaaccggcttcaaaactcgctattctgctgacg  
attttagcctttatatatcaccccgaatggagtagtcaagttgaaccggggcgaccttggaaagggctg  
tcgagaacttcacaacttcactctagggccaacctcgaaggggttccctctctttatgaaatagaacagc  
agccaaccaccgaggttccctcactagatatataggactggtaccttcgggtctcttgcgacactccgagca  
atggtgccgctctggttcgcttctttttcaatgacggtaacagaccaaccttcaatggcagataattatca  
atgtgacttaggaggttccgatgcaaagggccacacctgtggttgattgcctccgccacctctctacagtc  
agtttaaaattccactctcacctgttgggtgcttaaacttccagcagcccaaaaaactcaaaagctccg  
cttcgaaagcagttgttgttggcataaaggctcttcgtcaagtcgaaccacaccgaggaggcacttggtta  
accaccggatggagcaagttcgtgaacaataagaagctaatacgctgggtgattctgttgtatttatgagga  
aatcggctgatgagatggttatgggtgtaaggcgagcaccatctctagtaacgctcggaggaacaagctt  
ctacggcggagatgagtagtactgtagttattatcagagcaatggaggcgttgctaaggaagacgacggaagt  
gcaagaaggggtttaggaggactgggaaagggaaattgacggctgaagctgtctctgaggcgattaata  
gagcagctcagaaacagcttcaggatataagatccccctcactattcccttaatatcctctgatggtgag  
ctgatgggaaaaatataaaatctgggttatcgaatgctaatttgggttggaaatgtgaggttccagttgt  
gtcaagtttggattgctgtgttgggggattcgtgggttgaatcgaaatagttgatggaagcagtat  
tagttagttcattttcaaatgaatgccatatcccttagtttgttgggttgagattcatcttcaacaaga  
tacattggaaaaagaagtcggaagatcttgggtcttagtatggttgggttgactcagatacagtaaatc  
gctacaatctctctctctctctctctctctctctctctctctctctctctctctctctctctctctcag  
acattacgggtctctctctctctctctctctctctctctctctctctctctctctctctctctctctctc  
atgatcttagaatccatgggtccaatcctctctctctctctctctctctctctctctctctctctctct  
tctataaagtatctggctcaatcttgggtcaaaaagtgagtagaacttctgcttctatcttctctcaaaac  
attactgatctattgggtcaaggctggcatggaaataacctctcccttctcccatagtcacttctgggtcc  
tcttgtctgctctgctgttgaagttccacttctgctgctaactcctcatctctatctgtagctagagcatt  
cttgggtgggtgctagcataaccagacctgacatagcttactcagtgaaacttccacaatttctgatgagac  
cttagatagaaaagaaggttagattaaagttctatccttctctattaaacgcttccaaaagattggtg  
agatatcttctctgaattgtctgcacttgacacctcctctcaacttgctcttggttttagtgatgctgat  
tggccttcgtgggaatttatagatcactctcaggatattggcttttcttgggagatcctacgggaaaag  
aaggaaagaagtcaaaataagagagtaagagcctaggttagaagtcagtttcagttctcttaggtctctt  
tccacatatacaaaactgagagttcagttctatagcatgaggggacatggcttgggtacagaattgattt

aaccaatagacatatatatattatctttcttacttctgaccagtggtgctctatacatattggtgaatttag  
atatgaaaatgaaatctcctttattagaggaccactggtcaacagttccacagaaaatccaattcatat  
cctaacgcgagagaaaattgagacatcagaccagtggtacaaaactcaacagagaaagtaatactaccta  
atacttcatagttatatcaaaaacctaacttagatttcacatcaccatattggatcaactggtaataatg  
aagtattaagcatacttcgtagtaggtttaaacaagcattttcccatcatctggattaaagtgtttgga  
tactactgggtgattttctcatcaaaaatgttttacataaaagatatgaaagtgttcagaagaatatctca  
aatggattatcatcctccataaattctcgcactgcagtcctctttgtatactggtcagtataacagtg  
taatggaaatagctcctggacctctttgaagaaaccttcattattttttcagataaattaccaaagt  
attgcaatatacacagagatgtgtatgtgaatcatggtttgtataatacacaaaagtttaagtccatgtgag  
tgcgaggagcctctcaatcgaattattagagatatgtttccgcaaaccacttttgaccacttgaactac  
agaaaccttcacccagtaaaagtgaaaactataacctacatgcttgggtactattcttcttgaattacatt  
aatggataagactggatacactcaattagttaaaatgtagatagaatgaaatacacattaacctccttct  
ccatttactggttctttgattctaacctccttctccatttccggtctgtcctagttctttggttctaaca  
ttcttagcttaccgagataagcaattccctacctagaaaaagatgatcaaaggcattgaggatcaagcta  
tccttcttttgctgttgaattgaattgaattatgttttgtaaggacatcagattgatcctcgtctgat  
atagagactttcagggtttctagatcagctattatcctttgaaactcattaacgctctcaactaaggaa  
agaagtgtcagtgagctttaaatgatgaattggactttcggtcagaagtgagcctaagctttgttgtg  
agctgtctcgtttccctgtactcgcattcgccttacatcaaaccaatcaagctaggattcttgtgggattg  
actcctggtaaggaaccgctctttacatctctaacttgttggctcgttaggaagggagtaaaagcttgc  
tgaaggggaagggcaagctctcaagcaagctgtttcatgcctatactagctttctttgtttgacaggt  
tgggggaatacccaattcaaagagatcaagcttacactgcacagatttgacctattaagaaaagttccg  
ggaaggggtagaagatgctagatgtttccctagggtctgactagttcctacttcttgcctccagtgta  
gaaggtgtagctggcatactggagtcataatcttagttcagttggtgcctccgggtgtcactactggaatg  
agccaatatcttagtatcgtctgtaatgtggaagaagttagctagatgtctccctgtgggtctctgctag  
tggatacttctctctagcgggtgatcgggtgttggcacttcgggtgttgccagtcctgtcatttccctaga  
atatgtgttagtataggctggaatatgtaagtattgtctagaagttccctgttgggtccctactagctctg  
ctcttctttgttccagtgagttctgtcatgaagtgtagctcatgtaggattaccgggaagcagcttg  
tcgacgacgacgggtaagccgtgtgagcgggtaaggggtgcttgttgcctcagctgtctttagtcaatatc  
ttatgaatgttccgggtccagggaataatgtgaatgtagctagaggttccctaaaggtgcgtgcatactagg  
gcttcttctctagttaccgttgtagctgaaccagcacttgcagctgtatattctgggcgaggagcgtaa  
gcgacatggcatatttgtgaaagaatctcccttctctcgttcggactagccatgaataaccagttgggt  
gcttccagtgagggaaccctgttcatgcatggcggggcccgggatcccttgcctgctgcggtaaaagagt  
cttcttcttctgggcccgaatgtgtatgagtaggcgtgaagttaggcgaagcagtcctcccgttgatacgt  
gggataggagaaggggtctaccactttatatcactaagttccccctctccgtcttgcaggtattgtttct  
gggttgtgtctgcttcccgtgtgcagcttccacttcttctttgttctctgggaataagtagcatgaa  
gagttcatctgttgtccgttaggtccctggctgagttatcatgtgtagctaagtacgatctgcgttctgct  
gtcagttaataatctcctcctctctttgttccggatgggaactattgtatctggttgaaccttgtatct  
ggctacgccgcccttagaagcagagtagccagtcagtaggttagttatctgttcaagtaggttag  
gaggaaccagcttctcctatctcataggaggaaccctgagaatcaatatcttttcttcttccacaga  
aggtcagcgggtcactactcttctgactgttgttagctgttctgttccagacgaagtaaggttagccggctc  
agtctcttactcggagaggaacgcctactactcgaactaataggagaggaacgcctactactcgaactaata  
ggagaggaacgcctttgacttctttcttttgcaaaaaaaggaatgtagttagcctaactcactgggatga  
tgattggatcagtttagctactctgttaaggtctacatcaggaggttcaactaagcccgcaggtatattt  
ggcaggcacctgaagcaggttgaactctagctaggaagttcttctctggcctgtcacctgagttagaggct  
aggctccgaagccttcagttcttttagtctccctgagagttgttagagaaggcagcattggctcagagaggt  
gtgagcgaagcgttagtagcgtgctataaccgagaaaaagtaatacaaacctaaatctaggaaatacagctgg  
gtgtgctcatgttggctaggttagcagggccagacaatcccttactttcactttcgtgtgtgcgtactat  
taagagttacgtgtgtgcgtactattaagagttaggagataaccagcacagagagaggaggtgtgcttca  
gtagagcacagaggaggataaacgttaggagagttaggaaggagtaaccagcactgtgcttagagaaagc  
agaggagtaccgagaaaaagcagcagtgctgttacagagaaacagaggaaaaaaagttcgcagcaaaag  
ataaaacagagacggaaaccttcccccttcatgctgtacaaaagcggccagcacaaggtcaaggcgaaga  
cggagcagcactacctggagatgatcctggcgaagaacgaaccattaccattctaaggaggggggaagcac  
tactatataatctcttcttaagaagctatcttaagttccactttccattaaaccgaagtctaagatcgc  
ctggcatttagcgcacatcctaccgtctcgtttatgagcttgcacttctgtacttctcctgcctctgaaggac

cggaccaatgatagaccatgggaaacaggaattgaccaatgatagttactcggaaactgggaataggtt  
cggggcttagctatttaccatagtaagctatccttaagggcttcgatcgggtccatatcaagaaagtcatt  
ccgcttacggctagcgcagcactttcttttgggtgaatatccggcgaatgaaataaccattgtaaaagctag  
agatgaatgcttcaggtcattgctgggttcgatgatccagctccagtacaaaggcaatgtactaagaaa  
gccaaacttggacagggcccttacgtatctaagacatagttcgtggcatacgcacgaagaagctgggc  
ggaaagctcggacaccaacctcaaaaggcgggtgttgacctgttacagtacaggggaagatccggttagcc  
aaaacgagaagatcttccatagcttagtttaggggggtggatTTTTTcattcctcaatgggtgctgctttt  
gactgctatctcgtatcgatctagtattgctgggttacgctagattgacacctttccttgaatacgaataa  
acgtgagagccaaccccataggtatgaccagggaggccaaaagtggcatttcttgcttcttaaaaagct  
gattgtgaagaggggtctgcccttgaatctcctcgagccgggtctagttagtctttttcctcgccttg  
ggaatcgtagctctgtctctgcctattatgctggtagcttaagaaggaatggggcgaccgaccccatgta  
ctaactgaaaacgctcgtttcgagacccccatgctgctcttgatgctgactgagctaccgaagcgatgta  
ggtaggattgcaagacacgctcgttttagtcgggcaatatccgatgctcgaagaacaagaactgaatagg  
ctcgcagacctggtagcttaaaagcttccaccgtttgagaacacccgaatccgagtggttagcaagagac  
tctaagacagatcatccgcgcccgaatcccctaacttcatttttgggtattccttttcgggttctagagt  
cgacaagcccataagacgataccgatgccagagaccgaacacagacttatctttcccatatggctctat  
aagacatccatggaatctttccacccccaacatctctattctttctattccgaatggcgcccagtatTTT  
taagtatgggtgtatacttttctgcctggaactcctgaattaattctttttctataggaaggaactcaa  
gcaatccggcatccccggcagctatgcaattacttaattcagctctacaataattgggtgctccgattttcg  
gctagtggacagctataccaataatcctgtatacagctgtataatattttttctaaaggattatcgggtga  
gcaagaattaaaatgtagttttgagtttcgtagttaacctacctttttcttttgggtggtagtttctct  
ttaggggggttacgagcctttagcattcagattgggcaatgcgagatagattgatttacattacctcgag  
gatagcttttcttttccaagcgcgctttccaacctgccatagtcgagatagatgattacattacctcgag  
cgagcgcctttctttcaactctatctattcttgcttttcaaacattgtattccttatagaatatcatctc  
atgtctatctatagtataacgtttctcatagtgccataaggctctgaaagactgagggtagtcactcaa  
aagtaatccgctcacttcgcccgtctctttatggctttgggttaactctatcgtctagctgtctgggtctcc  
gaaaaggcgaagacaaaacgcagtgatttactttattctatgactaaaccagaatcaccocggagtgagct  
gttcataagggggtcattatccgacagagcagagctatcatgccgaagaagccttttctttctacg  
ccccgggtggcatcttgactttcctaggtctctaatagttcccataaaaagagtcattgggctgagctgat  
cgctttctccacagagctctaaaatcctttctccgaagatccaggctcacttttccaggcaatggaatga  
cccagcaaaaggaaagggatcaaggcaataactacgcgcacaaagggtgatacctagaccgagcgaatctg  
accgtagcctatcatactgagtgaaagcgtgccgaaccaagggaacttgctttaatcttaggctcgcag  
ctactaggtgctgctaccttgaacctagcccgccttagggtagaggcattgaaagacggcttccagaatag  
gctttttgtacgaagagaagggttactactatataagataagtaattcattataagataagtaattca  
ttgtgctaaaagaaccactttgaggatcaatcccttactgaatgaatgtccttttgatcagtgatcacag  
aaggagaaggcactgtgaaatgagaacctctttcctttctggctaccaaactgtaataaaaagagcttat  
tctgagtttgaattcctcgaattctgtaagctagcttgggtctacctgctttgttctgatttcattgtatt  
cctcgtattcagcattcgcgcccgggtgtcacaanaagcaaaaagcattcaatcgttgaggcaactagtc  
ttggtaagggttttttccactgaatgagaagtttgatgatccagatgttttgaaggcgtgtttgccctg  
tgatacgcgtacgaggagtcgacgggggaagagccgtgctgggggttggaaagaggttccagctttagaggag  
ctccctatcttatcccttgttggcttattttgacagctcagctttgtctcgggcattcttgggttgcg  
gttacacgtattatccgttttgcataaaaagtccttttagattccttttgttcgcttccattataaaca  
actttccaaaaaatggcaactgatttgggttttatgttatttcagttattctctgtaaatctttatttgc  
gtaggatacttgtggatggacgacttaagtcgtgccatttctcagttctaccgggtggatccggaggac  
taggaggaggaaatacgcacatgccccgcacaaatccatctgaggggtggtcttttagaaggatattatgc  
tcatgagaatgagcactctcagatcagcagaggggttcactttctgggtcgaagaggtacaaggaaagt  
ggctcaaaacgccttttcttgaacctcgaggttagaggatcaaaacacagataccatcgggggagcaagtaa  
aagcagagagtgataaatgcgaaaaaatcaaggcaaaaaataatagcaaaaacacatgaaactcttagtate  
cgaaggttaccatattccagataaaaacgatataaaaagaattatcgatgtagcgatgtttgaacatgaa  
atgatcgatctgatcggcgttaagaaaagattctactatctttattcccggtaggaaaaaacgggagaca  
agttttgggtggagctactggaattgctgtctgactacgacataaaataaaagcgattccgacgactaaac  
cgccattccaaaggatctacttctcaggatggaaagaagcaagaaagtctagagagtcgaaatgaccttg  
gtccaaccatagtaggactgattcggaaagattctatcctattcttctaaaaaggagttctctaatttaac  
tggacttgaagcgggtggatcaagccccctttttctttggctgtgtccaagtgaagtgaaactcgggaa

tgaagcagataggtctcagtcgaagaaaggtagccctattgggtctgggattgcttacctttctttcctt  
ctacagtagccttaggttattctaaacctccactctcagtcacttttgaatcgattgccttacctata  
ccgaccctactcaacagggccgtgaactatgaaaagcctgccaggcagagaaaaagtgcaaaagcgat  
tgaacaaagtcgctccggttggatgcagatgagggagaggggtgaaagctttcatttaaaggtaaagggga  
agggaggaggacaagtagatcttatcctgctgagtaagatgaagaagagagccaggctcactagctag  
gtaagggctacgattgctctgcctaccataaataattttaattgagcctatactctttggaaattactg  
aaagagagggcctaggattgctcacagatctgcttaaaggaacttaagataagtgctggacatgctttggt  
gaggggctcaaccaatcaatagcttcgcttacttccccagagctcttttgctacttattgaccactgact  
cctagatcagctaacgactctttgaaagcatacagatcccaatgacaatatcgtcaccctgaggattg  
gggctatgagttgaactatgcctgcaatccgctgacatgggtactattcttcaggactatcccacatcg  
acgacaactactctctttctgtaaaagattgctgcttaaaaagaagtctgactctcttataatcaatcc  
cccttcttctggaatacgcagctactactttgattgaaaaattagaacgactgctgatggtgaagcgg  
gaggcatactttgatgtatcaagcctacgcactaacttctgctccttcttcagacagaatatccttgct  
ccatctattggaaaatccactcagagactcaatagttgataatagttgaaatagctcctccggtagccgg  
actgtcattcccactttttctgacgatacaaaaacttgcttttcttttatatagatggaaaagttagc  
aatcctattttcttctgtaagagcacatcttacatcgcaaaccttctctttatataccgacgatttctat  
caaatggcatcaatctcacaatgtgggttgagcaattctatgaccagcaaaagactagaattcccttgct  
atgaggtagctcttaggtcatgaattttccgggattaacaatgctaacttcttgctactagctgcttc  
ttaaagtggtttgacaccaccagatccaatgaaactcacaagcttatcttcgctcagtgaggtaactt  
gatcaatccacaacctcaaaactatacccatcagctttaccaacagcaaccaatccgtaagtaattctag  
agactgcccttgtagctttatctagttctgggtgaaacgagaactttataattaagcctactaatcatacc  
tccaaccccccaacacagggaaaattctgggggtccaaagctggcaggctaggttcccgtttcttctct  
tcttaaccttcttcccttcacagctctaattgcctcgccagagctctttgacgaactcacttttcagcac  
aagttcttccaggatcaaaggatgcaaaaaatcagatcttattaacttccctgggtggctgatctcgttgg  
ccatcttctccgcttggttcagctgcaagcggaaacgtgttatgaggaagatccttgacaatctaaga  
tccttaccgtcttctgatccctgtaaacccaatcctgaagctctcccatagcttcagaactctatc  
acgactgtaaaccttccctaccagctccactgagcttgttcaggcgataatccaccggctcccacaca  
tggttagctcgtccaggatcgcaaggtcgttcactcgctacacgagcgctcttcagcgacatactatcgt  
aaccaagatcaagcagaaatcccatgctccgaggtctagaacacaagggcaagtaggagatcggaacg  
cataccatatctcgcagaaggtcgtgtagagccatcgctagatctaacctggacgagtgagctctgtca  
cgcttccctgggtttcttgcccagccctgcggtagttgcgcttgccaagaaaccttttcggaccgag  
atcgtcttgcccagggagtcgcaaaagctccagatgcaggaaatcccttctgagttggaccgctcaccac  
ctgctcgatgaatttcccaagcgacggatctgggtcttctcagcttcaggatcggcggatctcttcatc  
gtcgtcatgcgatggaaaaaacatctgctccaccgagcgagaatccgcctgatcagcgctatctcgtt  
actatccaaaccttgtcgaaatcgtcgttggatacccacagtcagaagaccgaaggctctgatccat  
ctgataagacccgagatggatcttctcggtagaatagagaaaagagatgaaaaatagaaagaaattgggag  
aaagcttggctgatctgagacgccactcttccatctttacatagcagccctcttttttccgtataacca  
gattccagggtcttccctatcgggcttgggtgtaacacagttcttaactccggatcagcttcaacttgag  
atagtaattctgctgcatcgaaagagggaggaggtgcgaatacaagttccaacagacgctcaggttgac  
tcgtcttgacaacgcatcagcagccttattttcagttcccggttatactcaatgagaaaaatcgaagcct  
aacagtttggtagcccatcctctgttgttcccttgggtgacaaacctttgttccagcaagtgctttagactc  
ttctggctctgtgctatcgtgaaacgttgcctgatgtctccaagcttggactgccaagactattgctaa  
gagctctcgttcgtacactgatttcaagctcccttttcagaaaaccttggctgagatacgcaacaggc  
ctgttcccttgtaataaaacagctccaattccatttcccagcggggtcacaaaaggtagcttcaaatct  
ggcaaggctagaacaggaagcgtcgtcactgctcctttgagagccttgaaagctagtgctgccatttctg  
tccattttaaactgttctttttgagtaactcgggtcaacggctctcacaattttcccataattcttaacgaa  
tctcctgtagtaccctgcaagcccaagaagcctcgcaattctgttgtgttctttgggtctggccaacce  
accattgcttctaacttagctggatcagctgacaccccttcgcccgatataatagtctatgtcccaaat  
atgcaatctgtggttggtccaaaagcacacttcttctgtttgcataaaactgggtgtgttcccaaatctg  
gagcaccattcccagtgatctatgtgttccctccgctgccccttgctatagactagtatgtcatcaaaaaat  
accaacacaaacttccctgcggaaaatatcgttcatcacggattggaatgttgctgggtgcgttggtaagc  
ccaatggcatgaccaggaactcatagtgccctcgtgagttcgaaaggcagtttcttccagctctgtgg  
ctcgtacacgtatttgggtggtaccggatcttgagatcgagttgggagaatacagaagctccttgtaactc  
atccaacagttcctcgatcacgggaattgggtacctgtctggtaccgtgagcttgtaaaaggctcggtaa

tccacgcgcccgtagggccatcctccgctccttcttttggacgagcaaaactggacttgaatatggactgatg  
ctcggctggatgatccgtgcttctaacatctccctaaccaatttttcaatctcgtccttctgagtatatg  
tataccggtaaggacggatgttaactgggtctgctccttccctaagggtgatagcatgttccctgccaca  
ttttgggggtaatccttgcgcatctcaaacacgttttcatgccattccaacaactgtttcacttgagca  
tcctcaggaaaattttgagtcttaattcctcctgcaaaacagtgcggtgagctctaggagataataagcc  
ttccttccctctttgactaccgaattgagagagatttgagctcgcaccagtgacggatcgctgctaagg  
tgaccactgatcttccctacggaaactcaagggtgtgtcttccccaattcattctgggtgcacccagagt  
agccaaccacgcataaccagcactatatccatgggttacaggaagaagtccgcacgtatctgcacatctt  
ggaccgttagctctactccgctgcatttcccggcacttggaaacgacttgaccatttccaatagaaacccc  
aaatccacgagtttctgtgatgtgcagaccacaccgatgtgctacactctctgctatgaaattgcttgta  
gccctgaatcaatataaacaatgacttcttgtcctgcaatttgtcctctcatcctcatggatctctctc  
agttgttaaacctgccatcgaccgcaaagacaaccagagtaattcctttacttcatcctcatctgattct  
tctatcttttccctgtttcagcttcatcagcctcatccaactcatctccttcatccacagccatatact  
ttaattctctgcccttacatctgtgaccaggattccacttgtcaccacaacgaaaaacaaagccccttgct  
ctttctatcctgatcaaacggtttccgggtatgggttccattttacgttctggggatcgggcccgggtg  
agaagcattggatcccagagatggaatgggaaatggagatgttgaagaggcgggttgattagttctggg  
tggagggtacgaactccttctcattggttccgctcctctctcttctttaaattgggtgaccaggcactgaa  
ggctgatcatctgtgttcacctggatggatataattgaagagtggaggtaaagggtcctgtcatccgg  
caatgcaagaccactccagatcgatgcctcttgggtcagaccatttccgtatactgagattgacgacata  
gagagaacaccgagatcattccgtaagagggtattgcagtgggtattgaattgtcaacaatcctctcttc  
acatttgctagaaagaattttgagggttcttgggagagtgccttcttggaaagataagagactttgc  
tgctctctcccaccttcaactaaggtagtgccttagctaaactaaaaagcatcctctaacgagcacacc  
actgtatatttttttatttagataccctcaaagcaaagggtgaggaatagggttagctaaacagtaaacg  
agagacgtaagtgaacgaagtggcatcttctagctaaagcaagcaataaacaacttctcttgttgcgga  
agtgagccaggtaagcaaggaagtaatagaaagactctcaagtgtagctctatctaaacgcttcagcaaa  
cccttgcgagcccaggtcaacttcggaccaacgaacttcatgtcatagagactagaggaatggaaccaac  
tcaaacgacacggccgattaccactagctgagccaccccggtatctgaactacacagaatggaatgaaa  
gtccccccacctattagccaaggatcagatcatatagatgccaagctactcaactgctcccagagagcac  
gcccgaagtagcattaggactagcatagactgccgttaccaggacagaaaagcattatccgataaac  
actaaaatgaacatactggcgtatgaacaatcttccactccaactcagcttccaaagaagccaacgtaac  
tctcaactaaaaaaaggagaggaaccctaatactgactcgactaaaaggagaggaaccctaatactgactc  
gacta  
aaaggagaggaaccctaatactgactcgactaaaaggagaggaaccctaatactgactcgacta  
taggagcgttagtgacacggggagggaaagaagactggaaccgtgcatctttgcttagcatgggttcgac  
aaaagaagagggtggaaaatggaccgagaaaataatgcttctgtgaacccaattgctttgacaaaaatata  
tgaagaatcagtgctattgaggaacattttatagaaaagaaaagaaaagaagcaatagtaagagagaag  
aaagcaagacttagaaaagaagacaataagtaagagaactacgatttacttgattccccaaaggggtacgta  
ggcagccaaggacgaatcctgggtccagttctttgctagtaagtgggaaaatatacacacttttttga  
aaaagttcgtagttaatctacctcggacgtacccatggcgtgtgggggttcgctggggaaaccgagtaac  
caaagtacgatcagttcaaggttgaatctggatgggtctttttgccagacgcgctgggttcgagtccagc  
tcgtgacaaaaggctacccttctcttaagagaatatcgatcctcaaaaatgagaaaatggaagcagc  
ttcacatcacaagtgaggaagccaccgggtgatcagctcaatgatcgtatacgtcaatagaatatgtacg  
cgggggcgaagaattaatgctgcttctgcccgccttcttaagcctttgtcaccctcgccgctat  
tcattggattaaaggagcgggtctgtataacatgagagaggaacactagacgggaggatcaatttatagc  
acatgacagtagcatgacggaaggaatgacaagactaagcgaatgccacctgaaaggacgaaaagaaga  
gactgaagcaaaagccgaaaagaaaagcgtgactggactgaaggaatggagggaaagctcttattaacggc  
caaagctaaactccgcttagcccggacagggacaaccaaagcaggaacttagagactcctagtaatacat  
catacctactaaatcagttattggggctataggtgttccccggggaaaataaccaatggagttgatta  
cgttgtgagtaaccgaggaaggcgtaacattccatagttgcacgggaagctaaccttctatcaacaag  
ctagcgggggttccgggcttgttttgggtcccaggggactagctacagggaaacaaggggaacaagggaca  
agctacacaggcactagcaactgggaacaaggggaaacaccaactcccaacttccctagcccaccttctc  
aacttccctagcttgcctggcccaacttcccttcccttccctcacatccctaaccaactgacctaacca  
ccttcccctaaccocacttcttcttactaaacagagaaccagaccaccttccctctccatgttcttcta  
cttccctctcaaataccgcttcttctcatctacagttcttccactacctcaaaaccactcctctcacccca  
tgcttaccagatcaaaggctggcataaacaactaaatccaagtatagttctactattactaccactat

taaaaagaacccaaaatctgtatTTTTGcccttaaggatccaggatgggtgtcaagcaatgcaggaagaa  
cttgatgctctctctcggacaagacttggatacttgttccacctccagttaatcagaatattcttgggt  
gtaaattgggtcttcaaaaccaaattacattctgatgggtactcttgatcgcctaaaggctcgcttgggtgc  
taaagggtttcatcaagaagaaggtatTTacttTgttgagacctacagtcgggtgtgaggacagccact  
attcgtactatcttgaatgttgcaaacagtttagaggttggccaatcaatcaattggatgttcaaaatgc  
atTTctccatgggtatcttcaagaaaaagtttatatgcatcaatctcctgggttttacgaatcctattcat  
ccatcccattgtgtgtctgttgaaaaaggctctctacggattgaaacagggcgctcgtgcttgggtcgaca  
agtttagcgattttcgattttctctggagtttgggtttgtctgcagctcagctgatccttctctgttca  
cgtatcacaacaattctgatgtcatgtatctgcttctctacgtggatgatattcttctcacgggcagttc  
caacactctgctcaatatgttgatctttcagctcagctccaccttctcaatgaaagaccttggaccagtc  
cactatTTctgggaattcagatcaaaactcatcctcgggtctgtttctatcccaaaccaagtatgctg  
aacagattctgaacaatgcagggatgttagattgcaaacctatgtctactcctctgccccttaagctcaa  
ctcctctgtttccactgctaagtatccggatcctcagacttctgcagcattgtagggtgctctccaatac  
ttaactctcactcgaccagacataagttatgccgtgaacattgtctgtcagcgaatgcatgagcctacac  
tcgctgatTTtgatctcctgaagcgtgtccttcgctatgttaaaggcaccatcttccatgggtgtat  
tcacaaaaacagcaagctcaatgttcaggccttctgtgatagtactgggcaggatgtacatccacgagg  
aggtctacaactggattctgtacgtttctcggatgcaatattatctcctgggtccgcaaaacgccagccta  
cagtgctcgttcttctacggaaacggaatatcgagcccttgactaacggctgaggagctcacttgggtc  
atctgcttcgagatctcggaggcgttcatcatccagaaagatgactgacgtcgtcccattgaatgaaga  
tctgggcgaagtccgttgggaattagccttgataaaaaggtagctTTTTatttgacccttccctTTTTT  
tgagagcaagcgcctaaaggaaggaaaataagaaaaaaaagaggacgaagcaaacctcgacaaaacacat  
ctTTTTTctatacgaaatttgttcgacctagaaccttgggtatTTTtacctaaaacgaaaagaaatcaa  
cctaagattctgggagcggcgtcagtgactgactcctTTtatgcaattcgaaattataaggatgggtcaca  
agtcactcaactcacttcttctcttctcctcacacgtacttctatagcttgcttgatgactactctgaaa  
gactgattgattctgatggatgatccatacgcgcgtgtacagttctTTTTgaatggcgaaaaggctctcc  
tggagtgagaaggcagatcgatgaggcacaagagtgctagtggactgaggtgggtgaaagattcaattc  
attctccatcttcccgtaagcttcttgactagactTTTTtgatcttctctgtctgacgctcgtcatct  
catatcatcagataaaacgactattaTTTTcaagtcagtcagaatttgcgggatcttgactgtgaggatg  
aaagttgcgggttagtgctccaatctcctcagtagatagaggtagaagaagagctataacagtatacata  
gtaggtagcgagatcaaatcaaacctagtgcgtcactatcatcttacgcaccgatcgggtctatctgatca  
ggttcagtatccaatcctgtgtaggcgggggagctgctagttcgctaggaaaaatagaaaaagaatatag  
aaaatctataatcagtcattgcaattgggagaagaaagttagatatacttctcgtaatccttcttctt  
tgatcagcctagcatctccctcgtgcttatttattctttaaacttttacctactgcaagacacatgcccat  
ccaagagcgtatgagttcatagagtggagaattcttcatggttcatcctTTTTcatgcaaggctagt  
acagatgggtgagaatgctctggaagaagggtgtcccagtcctgtaggggcactttcaatcaaccgggtgggc  
gctcagtgactcgactgaaacgagaaggtacttaattgggtccaacggaattctgctttatcatgaaagtt  
atcgaccgaggaattccatttcggttagcaggcttctaaatacgtgcttgcccgaaccaaggacctcac  
attctaatacaaggggaagatgctaagggtaccgataacttctgattatggattctatccaaggatcgggt  
tctatctatgattgggtgcgacgaatgcgatgactcttgggttaaggccttgccctccctcatcgatcaaaa  
tggccagtcacaattgttgcgcctgtctccctgccctgagtacgtcctggaaagcgaattcttaagctt  
ggccctctcttatttgaaatgcttttagtgagatccacatctcgggaatattcttcgatacgagctact  
gtacctttatcttataagaaccttctctacaaccttcaactatTTTattagtttctagtaagtaagttc  
ctgatgctaccagaagctccctcctgattctcgttgttaggtatTTTacttaggaaagagcagcactaa  
tgggatatTTTTtataatgggtattctgctaccctctcctTTtagtcgagtaataatccctctcctcatc  
acaagtggaagagtcacgtcagtgccctaaaggctcagttttaaactccgagactgcagctccagcagaat  
ccttccctgggtcagattccttccctgccttgggatgccttactttctttaaagggaaaagacagtatgat  
gggtggTTTTTccctgacttctgttttagtcgatcgagtagtaaccactagttattcaagcagtttct  
ttcccttatccctttagctttagtcggccgagcaggttctaacctttcttTTTgggtcgagtaccttctg  
tctcttccgagtggtcgagtaactcaagttcctcctcactaattagttgagccattcaggccaccgga  
tccctgtccctaccggaagcctactgtctgactcttagcctagctacttagattagactgagcgaactc  
tgcagctgcttagttaagttctgctactgactctcttccagttgaggtggaatcaaaccttcttgggt  
taggaaaaaaaccaccttacttgttagtcttgcctTTTTcaattcttTTTgggtcgaggagtaagcctca  
ccccaaaccgacactctttaaacttaattactTTTTcttccggcggggcattttcttcccttgctgggat  
ctTTTactagtgaaagcggcatcccaactgtcgaatgatgtctaactcctcatttccaaaaagcataactc

ctatccggttgcacagcctccatctgggttccttcatttcagctcttagtccagcttgtaactaactccaaa  
ccctctttctttcgagcgcgatgggatttgtgacaggagaaggagagagtgaaaggagataagtagatgta  
tcacagacggagatgccagtgagaatactgaacagacaacagctgaggatacacagcctaagcttttga  
ccataaacccatccaataataaagagaagatgtggaagggtgaaagatagtgtactaacgagaaagggtgaa  
aagctagggaaatttctgttcaagtttcagcttgatagctatatctttcctttcttaactgggttttta  
acttcacatatagcccatcagcttgtgacttcgcacactctcagtttcgagattgggaatcgacagaact  
gccctttcttaacttaattataaagggtagcttagctgggttagatttactgaaggtaattcaatcgctga  
acgttgataatagctttcgagaagagatccttactctccagctagttaaaacttccccgattagtaatgc  
tctcacccctggggacataatctcacctttgtcagcaaaaacagtagaaccatcttcatttctcagctcaca  
cttctctattccctttactggtgacatgggtgtcatttggccatctttacttgtttcactaccagcatctgat  
aaacttacaaccattctcttcttccgaaagaacaacctgtgtcaagtatccagacttcccttggtagg  
aatccctaattgaaagtgagaaggacctacactagatataaaggacatgggctctccactcattgcc  
aatgggttttagtggaagcccatgaacactcacatgggtatcaagagccatggaggggttctcttaagtc  
ttatccttttcttccaatatcaatattactagttgtgtctccattaaactcaacgatcggaactatctt  
ttatacgacgaaggaagggtgagattgagctctgctgaacttgggagagagatgtgacttcgttcccttcc  
tttcagctcgagttatttaaactctccagagctctgggtgtctacgagaagcttcatgagtaacaattg  
aggaagccgatacttatactttggtagagaatctcgcataaagcaatgggagtcaggtcggattatga  
tcggactacaaggaaaaaacaatgatgaatctcatcatgccatccaagagctgaatgcaaaaatggataag  
atattgaagcgtgacccaaaagaaaagatgacggtaaaactcttgtgaagagatgggtggatatcaagggt  
ccaagactttgggtgtgaaagggtatgaggagccacaagaagagttgaactatgttggaggtcaaggattc  
caaccaaggcctttcaacgaagggttccaagctagaggggctactgctccaacaaagaccaccttacc  
gcgcctaccaagcacttaccaagccccttaccaagctcaaggagttcttttctgctccaactgcac  
cagatagtgaggtgaagctaattgtgcaacaattccttgaaggacaaaagaaaagtaaccatgagatgaa  
cacaagatggacaacatgtacaatgatcttaatgggaagttttaaactttggcctctcatgtcaaatct  
cttgacaaccaagtgtctaaaccgcctcttcatcaagagaccatgggaacactaccggtaaacgg  
aagcaaacccaagggaacattttacataatgcttagaagtgaaaagagcttgaggaagtggtgagagat  
gataaggaagaggagcaagtggtgtgagaaaaggctaaacagatcgtcaactttcccttgcttggcatgc  
tctcatcagcaagggtatggcttaaggcgtggccattcaccgtgaagtggtcaccattgacatcccaaag  
cactaccgctccataccggtttcacttccctttatgcgaaaagggtaaaaaacatctagatctcaactttcct  
ggaaataacttgagctctagagttgaggagcagcacttgggtcatttaccttgaactcccttggttaagatct  
tcttataatgccaaagccttagtcctctccttgtagatctttgtgttctcgtaggcctcttgcttatttc  
gtcgaggtgggttcaattggaccaaccgcctttccgaagcgggtttttatgtcatagttcaacaattttgta  
gcccaaaaagctttgtgctcaatctcaaccggcaaatggcaagacttcccatagacaagattgaaagggtg  
tggttcttatgggtgtcttgtatgccgtcctatatgcccatagcgcacatcgtcaagcttgggtggaccaatc  
ctttcttggttttcccaaccgtcttctcgttttgatattatcggttggagattaggagtggaaccttatgc  
ttcacaccatgttttcttcaaaagggttctcaaaaactttggtgatgaagtgagatccccatcactaata  
accactcgtgggtataccgaatcttgggaaaatcactttcttaaacatttttagcacaaccttggcgtcat  
tagtggggctcgcaagagcttccaccatttttaaacataatctaccgcattaggatgtattgggttcc  
atgagaagatgggttttttcatgaaatagatgccccacacatcaataacttctacttccaagataaagtg  
ttgtggcatctcattcctctttgtaaagttgccttcccttggcaagcgtcgcaagaagaaacaaacca  
tgagcatccttgaacgtgggttggccaatagaatcctgcttgtaaaacaaaccttggccactgttttaaat  
gttgcgaaatgtcctgcatactccgatgcacatggcaatggtagagaatgcccttcaacttctctttt  
gaaatgcacctcctaaaaagaccatcggagcatctcttatacaaaaatggctcatccaaaaataatgtt  
gcacatctcgcaagaatttcttcttcttatatccatggaacattggaggctcttgatcacaagccaagta  
attaaaaaatcggcataccatggaagggtcatcttccatgctttccaaaatcataaccgcgggatactct  
tcttcaaatattcgagcacataatagactttctcttccggggaggctatcatctatcggtatgtcctcct  
cgaccggaagtctagacaagtgattcgcgactccattctcaattcctttcttgtcctttataaccaaatc  
aaactcttggagaagtagaatccatctaagtagcctcgggttccgcgtccttcttggcaataagtatctc  
aaagccgcgtgggtccgtgtgactattacttggagccaccaagtaagaccgacctaaacttctcaaaag  
gcgaaaactatggcgaggagcgtgaagcgcgggtgggtggcatagttgacttgcgcgtcgtccaaggttctac  
tagcctcatcttttccccctccccggatccatcatcctcgaggaggaggaaatctaagtccaagactctt  
ttagtaagactatggattgctaactctgcctacgcggaaaaatccatctttgctaagtccgggtcttcaa  
acaagaaagagctagggggctcgttcgacctgacgctgggttagacgtgaggtgaaacatgtcccgtctcg  
ccctatggcactaagtagatggcgctcaacttctgtccttctttgccccaaaacgggtccaaccgcgt



agtcacttgcacatgcacatgacctcaaatggtaaatccagttggactatgggcgcggtcactagagcct  
ctttaagcatcaagaatgcctcaaggcatttctcatcaaacacaaaagccacatctttgcataagagttg  
tgtgagtgccctagcaatcttcgataaaatccttgagaaatcttctataaaaccctaatagtcctaagaagc  
ttcgaataccctttaccaagtgggtgggtgcaaaacttgatcacctcaatcttcgcttggtcaacgaa  
tttttacttgtttgaaacagtattctaaagacacgtcttacgaaaagcagatttaatttttgaggaaa  
ttattaagtgggattctgaaacgtataattacagcttgacttttaacgaggaactctcgcaattagctc  
tactttctttctttctgggtttgggtggtgacttaaatctatgaaaagaaagaagagaacgaacgaacgga  
tttagttctggggagggtgggtcctcgtgtgcatggatgagcacacggagacaccaattaaggaacgcacg  
gctgctgctttctcctctatccctgctaattcctgattaaaccttcccctccactcggcgatttgccga  
tcccgaatggaatcagctcttcgaccgagatggatttgcgtggagggtcgtatttctgatccaggc  
gctgctgtaattcccgaacgctggatccccctcgttctggagggtcgttccgtcccctcgaccg  
ttcccgaactccgacaataggcgattccgtgctcgtaaaggagtcggaactctctatttctgtgtacaa  
cgacgatacggagggttgagagcaatctcgttacctccgtatcggcaggcagggtctacctgtggaacg  
acaaataaagtgggggtttccagaaacccaagaagacataacgagagtctcaataataagataactcgcc  
ctaacttcggggctatgaaaacaagaaagtaataataccacacccaataaaggaattccatccactccggc  
ttagctttcaaccgggtcttttaggttacgaacgcctagtcgacataatgtctggcggttacctgatggg  
tcccgaagccccctgagctcatcaatgaacggattccacctttcacagcgagctgttccgaagtgcgct  
gagcacagtgaatgcctcttacggctcatctatagcgtgctcccagtcgtcatgtagagccaactggaga  
gcacgcttgacatcctctggatcctctagagttatccctcgttgatgcaggagaatttgggctttccgta  
ccatggccgctccaaatcttcgacggcgctcgtgatagctctctacctcggcagagatgctgctgctc  
ttgtgcccagcctccctttcccgaagcctgctcctcaggaatcgggtgatgaccgacgaggaggtacgc  
ccggaactggccgaatcttcgaccatcctggatgtatacgtgaaccattctgaggaggaagatgccccgc  
caggtcctacgccataccatagaaggggttctaacaggagcaaagcctgaccaccagtagatagacgac  
ttgatccggatcaaagatagcacgaacccactaagaagagatagagaatcctcttcagcggctctttc  
ttacgaaatccaaatataaataccactagcgcacgtcgaagcatatcaatattaatcattttatatttt  
tcattttctttaagctgttgactaagggttacttaagaagatcccagaatattgactcatttactctca  
gggtgacttaataatattacggcgagctcttccgaggaatgcttacaatagaagtggttggtgattcgaa  
ccactgacagacggattttcagtccttccactcgaccagagctattacctgtcaccactttcttttaactc  
gtaaaggtaagaaaggatccgctcaactaactgatctatcaactttatttctctcttatgagattct  
tttttagtgatagttagaggtccgaaaaacgagaggggaagaactcgactatttctctgatttccagcaac  
agctctttctatctttctggctggtctacctacccatctcttccctgggttactcgatagatcttcccctg  
ggatggatcctgggctacttaagatcggatcaacttcccatttgcttactagcacaccccggcatcctcc  
caactgctgacacctggtttccggcctgccaagagagatcttcttccctttgtgctgactgaacactctc  
cgaatcatcttggcactcatcaactatgcttttttcttgactaaacactttggttaactcgtctgagc  
agcaaacgtacaactatctcttctgctgctggaacaagtagtatgagccagttaagtgagcgaagcaa  
cctgagctcctcagcacactcctgctttctcctcaacatcaacattcaaatgttgtaaacacttgactat  
atttaaaaccagaaacacaatcgattcaaaacgattaatcaatcaatgaaaaagacgagaaggggtga  
tcaattgtcgggtttgggactcattgatttctcggctcatacagggggaatcacacttcaaatcaatcaa  
atcaaccaatcctatcaatacatgatgttgaaattgtaatcatcgacgattatttcttggttgatcct  
tgtcagggggaggattgatccaagcctactcaactcaacaatcgtattatctaccttacaccttcgat  
cgtcaactcaaatccatcgcttttatatacattactatcgatcgacgaaaaccaacatcacacttttcat  
gtttcatatcgacttgggtgtagatccctggcaagaagcagcagaggaaaggaaagaggaaagcttcaat  
caaatttctcgtcagttgataactcgacttgttggtagaaggtgggagatatccctgctaattcggaatga  
aaagaagaaccaatcttcgtaattcgagatgatatacaatggagattcatctatctcccacaataaact  
tctacttttaggttgcctcatcgaaatgtctatagtcgaaaaccacgtttcagggggtatgaaggtgata  
ggacctctgaaatataagggtaggaagattgaacaccacttatcagggccaactcaactcatattgggtg  
ggcatgtgttggcatgttgacatattgggcaggagcccttacctctatcaagtcaaaagtataaatccctg  
cgaaaagaaaaggaaaagcaaaagatcaagaaaagtcaaaagtgtgctgcttaggaattgggaaattaagg  
atgacagaaatgggagatcaatcacctgttgatctatccatccaagaaagctgggcatccgaccaat  
aaagtatcagatttagggtaggtccttgtaaaaaccttcaagtgttactggcaatcgcacgtttcat  
aacttttcaggtgctgatacccctaaaactgaagagccaataaaaacgaagggtagcttcaagggatag  
gtcccgggattagcagctttgtgctagctcctactatggcagatgctgacagcacgcacgtgtaagat  
aaagtcaagaacttctttgatgctgctagggatgctgaagggcaagcatcagaaaaaaagaattctgatt  
tctcatattaccgggggtccatcctgcaaaaagagaggaaaagcataagatcaagaaaagggaaaagag

aaatcctctgattacccaaaagaagaagaaccgggtttcagaagaggtccaaaggaactcaacttaaatgct  
tgctttaaaaagaggaagacttagattactcagatgacaaggggatgtttacagttctgcttattgtcct  
gcattaccagctgatttaaactagataaacatatgtgatcaataaaagcaaaagatggaaatgattgatt  
ggataatcgggtggcatactattcaaagatgtacgaatcacgcctttaatcaatagaggtgcacttgtcga  
actttgatctaaaaggaagcaggagtggaaagccagcacactgctatggaagataagacggctcatagac  
gaaagaaagttaacagatcaggatctccaagcctatcgaagaccgtaggaggagtgtgctggaagactgg  
ttgggtctcgattctttcaaagcaggccgcttttcttttagatttagaggtaccagcctcatcgacaggg  
agctcaagtcgctctaaagctggccctttatcttttagcatttgaatgattaccogctgcttcacgaggag  
tgtgctgaattgggttttctcaaggatcctttcaagggctggacgacgtttagacgaagacaggtcttt  
gcttgcgtctaaaggagatgttctaggtgtgtgctgacgactaaatgcagcactgtgctagaggagaagc  
tacttaaaattgctgcgcttcatttgctgcgctaggagtgaagcctttccatcgcaagtgaactggagat  
tcaacagaagccgaacctcagtagattggactcctatagttgtagcgaacaggtttagagcaatttctgt  
tcaagttcagcttgatagctagggttaatgcagcacattggtagaaagagctacatatgagatgaacc  
tgtgtgctgcacaaaaggggaagcagcttccaactttaaccctgaaactggtagacatcagttgtgctcaact  
acgaagacagccaagccaaacaaaccagccagcctgctaagcaaagtcaaagctaaatctctttccggca  
aggctatactcaactaacaatctcagaactaagaatcaaagaatcccagaactttgaattcaagaactag  
ggagataagtggtgagttgggaaggaatgttaggagcctagacccttcccttaccagaccagaactag  
gaatcttataactaggaatgtgagtaaccctgaccctaagccagagaagttgggtaagtgaatgtgaatt  
agaagaagtttgaatgaaggggaatgtaagtgagtgaaagcaagaacaatgctagccataggggttcccca  
gcttcgctgaagaagctaggttccctccgcaactaagccagtgaccaatgaaatgaggggagagtagctga  
tgaaatgaggggtagtagctagattgtaaaccaactcatgggctattaaaatattgtcagatataagcc  
ttccgaaacaaatgcagactgtgtaggagacacaaggggaagccagaatcgggttgagctggtccaccat  
gatctttgatatgatcttatacatgactgagcaaaagactaatgggtcgcattctatgtcattaaccgagga  
ttgagcttcttggggattaagcaaacttgagtcgaaatccaatccaccggaaaggatcctgttcgaaaaa  
aatcctctcctcctggtagtagctattagtgagtgatcggctgctaggacaagagggcaatagcaccga  
ggaacgcctctgatcttcttgcgtctgtctcttccgatttcttatccgctttgagctctgttagtagct  
tgacttctctagtagctagtttagagttcctatcctagctgctagctcttcttctcctcgtagctctctt  
cttgtagctaggcagttagttgttccatccgactagtaggaagcgcggctatggaactaacagaataga  
tagagcggcaaccaatgctattaggagttcttttccggttctatactagcagctagtagctctatcccta  
ttagctttcttgttggcattcctttcgtagtttagagtgccatatacttgaattccattcggctcttgcgta  
gcttagaaaagcgcctcctttctcacctatgtactctgttaccttaggaatatcaaaggggtggaccattg  
tctggaatgcaggtatataatgtcgggagtgagcctagcttcccttcccgtagctctcctgggtc  
catccatcgtgagaaggaagtgcaatgattttgcagctcgtccaggctgtcggaggctcctggcgaaact  
gggaaaaggacgatgacaaccgataattagagggcaccctcctctacaagcagtttgatatttgtgggtga  
aggagaaaaggatgggtgaattcaggtcgtgatctcttctcatcctacactatggatagagctaggggtg  
gcaagaaccatgtgccggctcgcttttttcaagcttagaaatgttctgttcagaaggggagaagggc  
taccttctttcagatgaaaagttgaccgagggggccagtagctgtgccagtagggaccactggtaggctctt  
tctgatggcaggacgacgtgggcgcagcctgaaagcagcttgaataaaccttctcttctctctgga  
ttctctggagagggctcttccctgcctctcagagtaggggtccattctgcaagatcaaaatagaatagaa  
agaagtcgtcttctacgataaggtactttctgttttgagatctcgtagcggctcttatcgagaatgcgaa  
ttccaatcagactctaaagtggagtccgtgccccttccaaaggtctcagaggagtacaaaaggtgccat  
agtcgtcgaagggttcaagcaaggaggaagtcctcattcaggggggggtttcagaattccaagcgcct  
agtcagttgaagggtcagttccaggttagcgtccgattgtgcgctctgaataaatctagatgcggaagga  
gaaggtcaggggtagccgatgttagcaacctggctacacttcttttagtgaaaggtgagctacgggtgcc  
ccaaacttctaggagtagagatctcgtctctgcaggttcggagctcctatctccgtaccgagcaaaagcac  
aggaataaaatctctgggttcggctcttccgggtggacgggggtggatcgtaagctccttctcctgagtcgac  
ctgagagggctcttccctgctgttcttctagttgatgggtccttctttccattccttgggaatgggtgc  
cgtgctactgaatccctcattcatctgctgtgggtctcccctgacctggtgagagtcagccaaccccagc  
tagatggaatatccattattctgatgattctattctgcatctcctcggttcaaaaccgtctactcactaaag  
aaggaacagtagatagtagtgcttctagaagagccctcttgggtgaccggatgagagtcagagccttcca  
acctcgggcttttttctcttcttctcactcactcacttattcaactgtgtattttgggaggaccttga  
cttctctaaagactattggggcctattaataaaaccgaggggacccccaggctctggatgacaaagcagct  
cggaccttccatcaacaggtcaggccaacaactcggggctgttgatttgatgggactcactgagagatgg  
gagttattttttttccagagtagacaggcttggaggggaggaagccctcgtcaggtacacttctgagc

ttggtgttacgtggatagtaggggggaagggctcgcatcagaggggctctcacctctgtgcagcaaactcg  
aggtctcgacgagcctctgccgatcagcccttcccagcctcatccgtacctgaataatagtcaatcagtt  
gccgaatcggcatgaagccttctcaagttccatcctctcttcccacggataaagcggttgccggaagcga  
ctttaatgggcaagacttctcgtcgggccaccttcaatctcaatctccatttgctaccttctactcttt  
caatagaaggtcatcagtccccgagactaaactcaggtaagcttcttgaagggggggggaagtgtgc  
tgactctactttaaaggagagggacgagactcgactaagaatccgttagccttaagagaataggcccttt  
ttcattgagttctttcccgatgacctggcttattactcagacgagtttgataaaaagtcagtgata  
ccctgtgattcagagaggggaatccggctcttagacagcccttgcttctggctgtggatagggtttgac  
tctcttgctagaaagctaaccctttacctttatccggctactcggcgggaagagtgtgtacagccggctct  
ggactttccgctttgatagatagatctgacctcctcactctctcatcccttagagaaaaaacagata  
tggaaccttctctcgtctgaaacttcataaacactgaagggcgtagctcttctatcggcttcttatta  
gtcgtcgtctgactcttttagagaccagaaactctccgttcttgcacagggcgcagtaacttgattc  
ttcatcgtctttgattgcttcttgattgctaacccttagccaacctttcctcagctgatgccgacat  
gcctcttttgggttattctctaatacactctgggaagactcctcttccactcggatcaaaaagctgatc  
actgtgaaggcagatttatagccataaagatgatcaggccctagtgtccccggggcaaaaagccacgcttt  
gctcttgatgggtcaactcgaaaaaggtttgaataacttatgttgaaggctttgtctacggcttctgttct  
cttaactaagattccattcgtcgaaacagaagtacggccagccctttttatataaagcaagacgcaaca  
gaaaggaatccgaaggagagcagagagatgtggacagggctgtgcagatctgaccattggactggattccg  
agggctcgggaagctgcccggtagcagggagtcttaatccagctcaatcgaataaaggcgttagacagt  
gtattataagataaaggaagatgaagagaatgaagcgggaaggacaatatagacagattcacttcgtaggg  
gccgtgggtgaaaccaaaatcttccatctcatatagcgacgaattgatgaaaccttgttttacttcgtaag  
acctctgttggaaatgaagaacttccatctcatatagtggcaaaaacatgcaaaccttttgacttcgtaa  
gaccacatgagaaaaacaaaagtttactccaccatggacaaaacctagcaaggcactttgactctttg  
gatgacatgaaaaagtagaatcttccatctccccctaggggaaaacctagaaaacctgtttcactctttg  
gggacctcggaaagagaaaatgttgcgttccaccatggcctaaaacctagcaaatttgatcatttttcca  
tgattcctaagagtcaaattcatcgatagccaaaataaccggggtttgcgtcgttgtctctttttgatcg  
gctttctaagtatgaattgagtttacaacccaaaatcccggtaaaacgcaactcttactttttggtatg  
atctcaagagtgaaacaccggcaagctcaaacaccggtatctgagctcgtcgaaaaagggtaatgggt  
ggacctagcttccctgggtttgggtggcttgggaatgggaatagggtagtgtacttccctgttttccctg  
taccgatgggtttgggaatagggtagttgacttccctgttttcttataaaaataaaaattggtcaaattag  
gtactgttacttgggaagggttagctatagtgacatcctttgcttacagtccttaagattagctagacaaa  
gatgctggacaagatcttataggggatacgtacagcaatagggtaccaataggtaataggttatattact  
atcctaactacaccgacctccgagtccttgctttgtacgctctccaaccagaaaaagctccggaaacggt  
cactttattcgtttaatagaatgatccctcacagaagaccatcccatcaciaagtaacttccaaagag  
gaataagagctaaacggctcagaggtcctaaataagctttctttcttttcaatggaagaaaccctacc  
atccctgttttcaaacccatagaacacataaatcatatatctctgagtgagcttgaatcggtatcagaca  
tcgtacatcttagctgggagagctagagatagttcttttaagctaaccctcacatccagaaagccagga  
gagcaagaaagtaggaagaagagaaatccgggaaaccagaaagaaagaggaaatgtgagaactagtaat  
ccaggaataggaatatcagaatcaagaactaggaaagtaggttagttgggaatggtaggaagcaagg  
gaagccaagtaagccaaggggaggagcgggtttgggttagttgttcaactcataggaggaatggtaaatcaa  
tgtagatcccttaatgttagatcccttaatggaagatctgtaaatcggagaaatgggattgtaagacat  
gtgcatacaccctcaacaaaacggggtagctgaaaggatgaaccgcacaatcattgaaaaggtcagaag  
tatgctttgtgagtggtgacttccaagactttcagggcagatgctgcaaacacagctgtgcacatcactc  
aacaataacccttccacagcaatcaatttccatgttccagatgaggtatgggttcaatcagtcctactt  
attcatatctcaggagatttgggtgtgttgccttactgtgatgaaggaaagctgaagccttagagc  
taagaaaggagaggagaaggggagttacctaataaataggatagtaagcattctttacaccatagggata  
ggaaagactagcagccccaggaaagcaagccacctcggaaataaaggctaagtagacctagtaggagtag  
aggaagctgaaaccttccatatagaaactacaggataagaaagagtgcaggggtctgtaaatgaaccatc  
ttcactttctctagtagtgggtgttgaggaaactccaggttaattcaacaactgaagcctttactgagacg  
gatggaaatgatgctttacaggaggcttctgtagaagaaagaacaggctccgacgagagttccataaatg  
attcaagtaagagtctcagtagttagttgcagaagtagctgtgaattcaatagttctagtatctgttgct  
ttagttgcagtagctcttccaacaactggaatttcaatccgagttttgagtcogtgcctttcagaaac  
ctcctcttatcatgcccggattaagcacagaagcagtttagcaaacactgaagaagaagcagggctagctcc  
cttcagggcagtgaaactgtagtaaacctgggtatgtaataatagagatttagtagttcaagctcaatag

atagtaagggttctgaaagaataaatgcgatgtaaagtaaggtaagatatgtcttttagcagtcctatctt  
gaatgcctttgtctcactccctcatcaatgaattaatgagtttcttctgctgccccacgaataccaacia  
gtggagttaatgctatatactcatcctttccttagtaggggttctccctaaacaaaataccgattcaagcc  
cctttactaggttggggagctcaccgattctcgattaagaaatatcttaattaagagatgagagaacacc  
gactgaacttctagagctcttttttttttagatttcggaataaggaaagcttgcttatattcactactcta  
atgctctaatagcaatgaggaatgtaagataacagagctcgtttccgctcctctactggaccggtccccgg  
ggatgaagtaaacttgctactgattgagcatgaagacagctcgtttgaaatgaaatgagacatgctatg  
tgagaagggataaattgttgttgttcaagctaccactgatggaacatgtgaatgaacatacatatgaa  
catgttacacgcgtatatacttaacacgtgtaacgcgtatcgcacattagcttataagaattagctctag  
tcctctctttcctcggaactgaaataaccgacctagtccttagctacttcgctcaggtttttctatcta  
tattagttaggtagctcgttaacaacgtgtataggttcagaattccttaagagctaagaggggaaggtc  
ctccgctttttgttataaaagaaggagagtgccgctacccttactcgagacccaccctagaaccaactgg  
gcatctacgctcgatgcgctatgagattatataaagctggtgatgcccttctgattaaatgatatacc  
ctagctctccatcgcccggtaaaagaagtgagttgaattagggtgttgatgttccgatgaaaggaagaa  
agaaaaaataaagcaagcatacatcctaaactactgatctatctctttatgagtagaatctattggat  
gcccgtttacgatgcaactatcgaaagccatttgcaccaggtttataaagactgggttcgaaaggccgagg  
cactgttaggggtgtttatactttttatataatttcgtagcccaacattgggggctgttctgtttctact  
gcatataacattttgtttgggggctgaggttgggattgggaaatgagaactttcattttggcgttggg  
cctgatggcggcgcgactggtctcgatctcaaccagccgcccccaagagcagcagcccaccctaggagtc  
atcgtgctgctctcgatctcaacgagcttctccagtagcatttattgtacgcagaggtcgagggcccca  
gtctacgaaggcgcaaaatgacgtaattgttagctcatctaaatcaagtacaaaacttaactagggacctc  
cagactgagcctaataatctggcgtcgtcaggcgttgatagataactggactgggaggtcagaagcctcc  
agcgccttttctgatctttcgcagcagagatcgactcagggaggtccaaaggtcctggttgcgcgagca  
gctaaatcgttatcgataaatttaaaatgacagtcgggctccagactacttagcaaacctgagtgaga  
aaccacgatgggtgctttcaggaactggacaaaaggacctagaactacagatttgtctgatgctttctcc  
ttgaaaagaggggagacgggctatgtaggctgttgctgttcaacaaacgtatcagcaactcgacgataaaa  
ttggtaaaagaaggaaaggatagattcgggtggattggacaaatgagaactttccttctccgcaagctct  
catctacctttctgaaatagggcttctcgactagcttttcaactggctcaacttttattctcttatgaaat  
agatggatgagaggtaccgatgagaagagaacaactactatgggtgcaacaccattcccgatagcataag  
taagtcgagatagggtaacctcgtccagaagaaagagagcgttggaaagggaaaggaattagtaactagg  
ccgtgaccctctacacttgccccaatccggagaaagaagtctgctatatagtgacacctgtaagctcgact  
gactgcaggctactgaaccagtgattgccatcgatcggccggttccacctagttcccattcccatacgaa  
ccaagccttaattctcacttctgcttcaactttctacttccaatttgatctaccactcgggtcccatacgaa  
gaaggtggagagtcaggggtttatttaagttcggataacctgttcagctagtcacaacgctctcgctatggc  
aaggaaactactcaggggtgatcaacttactatataatgtgcatccctgctttgtgtgcttaataagaagg  
atgctattctcaccaaactgatagaagggaaagagatagacctatcctaacatcccattagcaggtggaa  
ttcatctctttacgatcagagactagcttgaaagaataaatcatttctagcatcagagatcaatctacg  
ctcatttctctttaaataaagtctgcttgggactggcaacatcccgatccgatcgttgactgagaa  
cgaggaaggctagaacgaggaaggggaggtgtcgtctttctttgtgccatatttacacgagctgggat  
tctttgttcaacggctctagttgaaatcaggtctttgctgcacaaacgtaacagtagcttgataaactcct  
ctgcaaggaagggctcgagctttctttctgcgcccgaagtgcggaatagggtgctataaagagaccggtgg  
tgggagaggtcaccatatcgtcgtagtttagctggagggatgaagtcataacgctggccacgagggcga  
gtgagggggcgaagcaagcaagcctaactttattcatctttttacctaaccagccgaagctctgaaaggt  
acaagacataggggataagagtagctgtttcctatgggtgacggagtagctgcattaacgccttgcgctca  
cacctatgggaagccccctgcggggccggacacatatctttacgtaggcatataacagtagctgcaggaa  
gataacaaactccttcccttggtttttagcatctagcgaagccgagagggatgcagctctggccggaggca  
atgaaagtgtctttatcgagagaagaagtcttgcctatcagaagagctcactgtcaggggaggagaagc  
tagcggaaaaataagggatataatgactcagacctgcagggatccattctacatcgcgatgaaataggctc  
cggagtaggaataggaactggcgtagggtggagcacggatagggaaagaagcaagagtagtgtcccaggt  
atctacatggggctaagagcagaatccggctagagagggcagaagaggcatgtttcatggcctattcgaa  
ttggatcgtttgcgctgcttggcgggctacactcggggaaggttagaggctatacgcgaatcttatagat  
cggcttggcagttgggtggagatgccgtttaccttgagtaggagaataagcctgagttgagtgccggtaa  
gagcagggcgcaatgtctctgatgtatcggaagtgtaggagatgaaagattcggagagagaggtggat  
tccgcaacaagggagaagcagcactgtgctgagagagatgggtgggtaaaggggtgaaggactttctttg

gcttctcaatggattgaatgtgtgtcacttctgtctcctattcaatggaaatggatgtcaggtttctgtc  
cctagtttctggatgtctcttcttttcccttctgcccctgtattttgatgcgaggatcactcttctatgatc  
tctcgcataatcctatccttttagtcttctatcgctacatcctgaacacttgtacgagaggagctacccta  
tgctattgggtattctatctctcttccattacccttgagaatgacttatgtgaacaggctcgggcaat  
cgagagttgggggcgaaaaggactctccggctcactactttgatttctgtattggttcctcttctctgt  
tctgtatcaaccttagccgaaggacgggattcaaagactagcgcctagaaaggagctccgtatcacttggg  
ccctccacacacagatgttctgtattccatctgttcaactacaactcgggagggggatgactctaact  
gatgaggctgatctctcactctgggagactgatgagtaggagggagatgcccgaacccgagagatata  
tagatgcttgggtcagagaacctaaagtccgatcttcttctctctgatgaacctaccgtctctctgttcaga  
gtatgcaccaatggatgtcccgccttcccggtctcttaccttttcttctcttctcccaatagaa  
ctactcgataaagcacttctctgtcttctctcctaccgaaagatgtacgattatcggtataggaagaa  
agatgtactatcggctccgctaggcgaacgcttagagtttgactgcttcccatagaaacacgagctcctga  
tgggtgagctctcagaaagaagagtcggaatcagatgcagctgcttggccctcaatgggcatataccacg  
cccaggcttgcttaccactcagtggttccgggatgacgactgggtgactagcacaccaatgaaata  
ttcaagggtgactcgttcggagtgaaggccaccggcaaggctgcgcctctgtaatgggggaagatttctc  
gcttctcgatctgggaaggctcgctactactaccaagtctccggaagatctctctggtaaacttcgatct  
actaccttcttcttcttcttactatccagaccgtaaccgtagtctagaaagtgagatttatgaccac  
tctcctgaaagaattacaaaaacatcaatgagtaccggcactactcttgtttacagttgtatcgaatga  
aagaagagctctcgctcggatcagagcttctgtgttgagaagtaataacttcgagaggagttctcattctg  
gttgtgagaacgagcctgatctcagtttaccacgcctgctccttcttcccaccattatcagaaaagt  
tcgctgtttgtctccaggctctgagccattctgtctccgacggagaagcctatttctttaagggtagtgt  
ccatattgagctcgtactctgactctaccatataatctgatagtcgggtttgggggtatggcttagctgcc  
ttttgggttgagggggcaggtaaagcagggccaggcaaggcttatcgaagggaagagatttctgcttgg  
atgattgcttgaaatcggctcttaagtgagcaatagttatattctccgtttaaggcatagttgttgcctct  
gttgattgaaagcttcttgtcatagcgagagtcagggttgatcaattacagttggattagctgccac  
taggcctagtaccacagccatcatcatccctgacctcggaaatcggcagatcagaagcatcgcgcttcca  
cccctctctcccttctgactcgaatggctgaagctgagagtcgcttctgatggggaggagtgagatagg  
cttcggcttacaccagtgatgtaagcggacctgaccctaaaaggagtaaggaaagatgaagtagtgt  
gggacgagatctctgtattgattggggcaggcaagacctgctgtccaatgcttctcgttcagctaaagaa  
ggaagagtcagttatgtgcccttctgcccggtaagatgagtttacgttccatatagagaactcttttcgg  
tcttgatttgacaggaagttgactgggagactatttatgattccctccggtaagaacaatgaagatctac  
cagccatttgctaaacaagaagtgaaaatatcagttaatggtcctacgaatcaattgtcccctcaacgct  
taaggagagatttttgtggaaaagaagggtgatgtggccctattctctattttccaggcggagctctca  
tgagccaggtaggccctatatcagtcgtagatcagtgaaatgaacaatgaggcaatgcttttctacaaggc  
actgtaagctgtcaatccattcatcgggaaggaaagaggagacggggatcccgtcatagaatatttcaatt  
agatcgaacctttactaacaacagaagtgaggaaagcggcgtgagacgcgcctcttctccccttttgag  
gactgaaatgagacaagacaaaaaaaagtagcatgccctgttcgctctatttgagcaagtaagagaag  
gcgacatccggctcctctgcccataagccaaagaaaatctgatcacaatagccgggctgagaatagaat  
ttgaactccttactggaatcagtggtttttagctttaataatccaactgggtgtaactagaacacggccgg  
gagccaatccccttctcgttccgggagcgtgacctgcgagtcggtaaatccctgttcaatgtaaaaa  
agaataaacagatgtctcaacgatccttcaaccctgctatcttagccttcccccttatacctgctcctc  
ttagtggttaaggcttagtggttctccttgggttagcaatagcaactgccctccttcttcaactaggttaag  
caagttcagagacagcgggatctcccgaacaattctcctacttagtggttagcccttctctcttactga  
ttgagaagtcagtgatgtcttgacatggagaagacgaggaaggacagatcagcaggactcccgaccata  
gtagagctaaagcagccgtagcagtgaggtctataggttggattgggtcctcttctcctcatcagtatc  
agcaagcaagtcgtagctgtgaagtcctataggttaggaaagttcctcagtcacgaactataggtgggaaa  
ggtctgcaagggttaacagagactcctgggtcctggtaaaagtagccggagcctcgggtctatctctccac  
ttcaaagcagcgggcccataaggaagcaaaagcgggagagagggcatatgaaacacagaatatagagagg  
taaggagaagcggccaatcgaatcttgcaacaaaagtagcgaagaaaggactagcttgattgttgggaag  
gaagattgtcgtatgttgaaagacagttccctcagttgggtgcttgtggatgatgaaggtattcggtgag  
tcagagccccattcctgctgcttctgcagatagggaaagacataagccgttctcctgttccggaatctgag  
tctcttcacctaatacaatttcttgttcaatcgagtaaagtgcttgagtgatttctgcttcttggaaac  
ggagaggaagcaggggtcggcttacctgaacacaaaacagggagctacttattgctacgcccatagatag  
tgggtattccctccctatatgatcttggcttggtaagaggaagctaatgctttgattcatctaagccattg

acaacactttcctaatactaagcccattgacaactcttctcctggagttagggaccctctcgccgagttc  
actctatagtgtccgtcgatacatctctcgctatggcaaggaagatcaatgggatgctgttcaactgaga  
gaagagatgctcctgatagatgggatcctgttctaccaaactgatagaaggctctgctaactcctaccaa  
actaaagaaggaatggaggactaaagaaaatggcagaaggctctgctgttccgaagggatgctattccgct  
gatagaaggggaagtcaactcggggattcggatggtgagatgccagaggagtgatggaatatccagctgcc  
aggatagaggaatgatgtgaatgagatgcctgatagaggagttcagtgattcggatggtgagatgcgaa  
tctccagtagaaaggctagcggatggttgctaacgtataaaggctagcgtgtgcttgggtgaggatcttcc  
ccttctacgcttgactcctactatcagctacattacatccgcggaatctagttattcaatctataagtct  
tctatccatccgggcatctcgaggaggagcaacaaggaaactatggttagacggaagagtgctgaatca  
tatgaacgatcagatggggctgtgaaatgaaccctaagacagagggcataaactcttccgggcaaggg  
aaggcataaacaactcttctcttccgttagaacgccttggagtctctgctgaagcagctaaaaggta  
tcggaggaatctctagaactcttcccttctacgtaacttctcgtcctgataggtagccggatgcctagg  
taaccataggattccccttcttgaggacttagctttagctgttagagaagggcatggctttagcagtta  
gcttcatcttatttggtaggtgatggtaggttggcgggttagcagctgttagctgaatcgggttggcg  
attccgggaggttagcctcggcagctcttctagttattccgcttaggtatgaatggtagggtccaggtgaa  
tgggtaagggccagggcatcaccgatcttgggtgtcccgtaacataagcctacttcttctgtctgtgaga  
tggatcgacaaaagtgtattcatgtcttggctattggcttccggttcttaggggttactccttcccaatc  
cgctgcttgggatatagagaagccgatggttctgctaatagagaagccgatgttctgctaactcgagttc  
ctggggctcggtagcttagctggggtaatcccctgcttgggatacagagaagtcgatgttctgctaac  
ggaggaaggaattccaagataagattgtagttaaaggctttagtggggtatagtaaggcttggagtggg  
agttccccggtagcttagttgctcgggttcatctcccatccgctgctgcaatacgtgcagcacagtaa  
cggagaagaagagaagggctcctaagaagcctcatgtgaaggagttccgatcaatagataagtagtagga  
atgggctgtggatgagccagcctatcagataagtagctactgggattccttctctataagagctctattg  
gagttgtagctgtagatccttctcttataatgagaagcttagttcgaatccttctctcattgcttgggag  
tgcatttcttccggtcaatggttcaaatgcgcgatcatctggcttggcttggcttctctttag  
ctttaggaactgagctctctaagaaggatcacctgcttataataggctcgcttctcttcttgaagcta  
ttaagtgcattgacttctgagaaccaaactgggctccttaattagcttgaccggaacccttcttctg  
atttgcttagcttgatttgcttagcttgattcaaaagctctctcgcgtggaaggaattcaacctctcatt  
tgatgtgcacttacgcgccatcccaactccaatactcgagggcttgcttggctcgcttcccggttcct  
tacttggcttggcctgttcttcttacttcccttgacccaagacttctctcttactacaagcaggtccat  
taagccagggagtggtggtcactcacctgtatttgccaccgtgttccctagatataagccagtgatagaa  
ggaggagttatcaacaattattccaagccaatcaataaaatacaagcaaggaaaggaatcaaggcaagc  
caggcaagcagaacaaactatctatgaataacaagggtgaaagagctcagttcctggttaacagtcacc  
catctattcctagttagggatcaaaaaggacatagagatcaatctatcgttctatcatatacgggaa  
agttctcagacaagcaacagaaggaaagcagaggaagacatagagtagccattacagttgagtggttaaca  
cgtaaatattcgaattgagccattccagctaacaatccaggaagaaaccagttgagtggttaacacgta  
gaaattcctattagtaagaaaggcatagagtggtccattccacatagagtatccagttcagatatctcca  
aatactcagaaggaagaaagacatagagtatccaatcttgagttccctctattatgcggatattatcga  
atcggccaatcatgcatttccaactctcgcgtgtgtgtgccacggggtaccttataatcttatatgct  
gtgaggaaggaaggggaggtctcttattcctatgcgtgcttacttacttgacccatcccttactc  
cctctcttgtactattgtattgcctgtgttggctagcttaccctgttccataccttccctagcaataac  
aggaccattcaacaaataagacattcactctagactcgtacgctcatgacttgactcctaacttctct  
tcttggctcttattcttactggaaagtaagtctatttctcttcccagaactacttcaactctctgaaaat  
cagaataagaaagaccggcacgactgaactcagtcagtgacttctctatttgagttcagtttaggaag  
agagttccgtgacttccgagcttaaggagagctaccaaaaggtaggaattgcttcatcaaatgacatag  
atatgagtagaactgagcttattcaataccttatttttttgccctatgataaatgcatagatcgctttt  
ttactggaagagttcaaaaatagcacgtccattcgatccttgtttttaagcgaagggcgagaggtgaa  
ataagggaacgtccaccaccggacacctcaatcacaagaagcatcataacgaacgacataatgggcacc  
tcacaagccggttatcgaaagtccgtggaaactggtaataaaccattcttctttagccttgtcggata  
agtcggcttctctctggtcgactagtatacagaacagatggtgttctcgactccgtgcaatccgaatcca  
taataccttttagtcagtatatcttggagaatctacattggaaggcctgtgtgaaggaggaaaatca  
aattaacataccactggaatacccctatcgtagatcagaattggtaaagggtcccggcactcaaaaccgtc  
catactagggctagctcgacttagatcgactccacagaataagactaccattcggcatcccaccacctca  
tatcttattaacataagcaaatatgcccgtctgcaggtcctcttcacgcgaaagcaacgcaacctcctc

gcaaacaaggagacgctcatttccaactactctcaccctgtcgaggcccgagtaagggttttgggtgggg  
aaggaattaagccatagagtccttgttattcccgcctgttgcccgcacctcattcattaaaaatgtcataag  
ttaaagggtgttattaacataaagttggttgatttgccagcctggcctagagcaatggagaggactgttc  
gtatagtagttgggacaaccggctcataaatatgccattaaacgctaagaaaaaaagccttctcgtaaaa  
gtccctcagtggttaatttttgtgatctttccgatgaaaccggatttctgttcggaaagaaagactaa  
gtcaagtttcccttttgcctgtgtgtgcccagttgaagggttgctactccaattcaagtaagattagata  
aatagattccactgagtcgtatttccctcccaggtacgtaaattggttaggcttgcagaagctggcttag  
taatacctattcccatcgaacaaacagggataggagttataccgcagctgcaaagcaacaggagccgctc  
actcagactaatggcctcggctatgccttaaccatcccattagtccttcgggatcactcaagaagtaagct  
gtgattaaccagctcacttctataggggggtgaactacgccttacacaaacgaaccctttgataacgaaac  
aagctaatacaaaaaagtttcagaaaacaacagaagatgttccggatgatagatgcggattagggttagtg  
gttagcttacgagtagtacgggcacaggccaaccggtgaaaccaggggaataaggaaagaacacagttca  
ataacagcatattcccagtgaaagtaagaaagatttgaaacaaaactcaggggaagtagcatttcgagtac  
aaagtttgactaatttgctcagttggactgaaagggtaaccgtaaggaagaatgaaagctaaacaactttt  
agttcccaaagaagaaagagttaaatctcgttccaaaagaagagacagacaaaccaggcttatcgattgc  
ttatccaaatacgtatataagaagattcatctcattccagactctactttccgattgatagaataatcag  
tatataatcagaaggctgctttgtggagtgatctttctcttaactatcactaaacgaaacaaagtggaa  
tgaaataagagaaagagattcagttgagaactattgtaagcattcctcgggaagagctcgccgtaaatat  
ttattcaaaaatactctcaataatatacaaaaatgaaaaataaaaatgggtattaatattgatatgct  
tcgacgtgcgctagtggtatttatatttggtactttttactttcgtaaagaaaggaccgctgaagaggatt  
ctctatctctctcttagtggggttcgtgctatctttgatccggatcaaagtcgtctatctactgggtggc  
aggctttgcccctgttagatcccattcttatgtatgcagtcggagcgggagcacttctgggcccctaacgg  
ggctgagagctccgccacgtgggaggaggattcctttgaaactggacgttctcgggagaatcattctcctcc  
tccaaaacggacatggactcccaggtggcggaggcgccccaaacggaagaggggggaaccctcggtaaatc  
aagtgccccaggaagctggggcatctcatagagtgggcccctatcaggaccagggcctagctactgatag  
gaatggtaaccgcatagatcttaatgattcgctccccccctctcgttgttatacggagaaatagagagt  
tccgcctctgtgcgagcgcgggatctcgaattggagaaagatattaagcgggtccagaggtgacgcgga  
acttcgataacgcggaggatcccgcctcgtctggaagtagccgcgcgcctggatccggaggtgcgcga  
gctagatcagaagtgggcactcttcaagaaaaggatgcctcgggctaggcagatagccgaatggaggg  
agacgttttcggaggatttagcggcgggaagggagaaagaagcccgccttgcatcactaaatcctgggt  
caaggtgatcatccatacacggaataaccaaccccccaaaactaaagcttccctcctcgaagaaagaag  
gtttcagtcctattcaaccaactctctttttgaaagcagatagttcacgagataattgagtaagttaagat  
agatgtaacaatttgaaacaaaggccttaaattattccttttttttctaaagtcaaacccggaaggaga  
aaataccctaatttttctcttatccatcgtcttcttggttagcaagtttttttgtctttgtgttagtcac  
caacttatttaccagaaatagataagggggatttagtaaatccacttctgggtgctggcccagctgtcgt  
gtctattgggttctctttagcggctcaagagccgcttataaccaatctcctcttgggggggaacgggggaaa  
tactagatccctcatgggatcaaaaacaacctatcaccgaagtcccacctattcaaaaaaatgggtgcct  
gaaccgacgggaagctcttttgcagggctcagagggctgcccgccttgcccgcagcagcggggcctacg  
gtcggacagctgggacgtgtctgtgtgaggttgccggggaagcttgccctggattatcgcccgtgcctgt  
tgtcaggaatgcgcgcgtgtctccctaacctaaatatcaaggacttcaggtgttcggtcgagcttgtcat  
cttctctcctttcagtcgctcgtcgagacctgggtggaccttacagtcgagctcctttgttcttcggac  
cttctctttcagtcgagtcactttgtacctcttctcaaaataaggggtcccttagttcaagctccatccc  
acatccatttgccaaacgacgaataagctgcgtaagctgctattcaaaaatctgggtctgtctgtaagca  
attacctttcctggcttgccttagtcgggtgactctatgccctcttcttccgcttgccaccttgatctag  
ccctctcgttgactgacacatggaactctaagcttcaagtgacacatccatctcagtcacaacatctcta  
ccactttatgcatctaattcattccaggggtgggtcattataaccatttgatcgacagaatgggtgggaa  
gatggagtgaaagttagtttttcgatagcttccatcgttccaggggttcgaaggtctggatccaaagtcaga  
taagaatgttttgctaatagcggccaaggacaaaaagaatggaaaatgatttctgtactaaagatctcaat  
tcaataggggattcatttccgagatacaaatgggttattccgcttggtgaaaaacaagaccgaaaaaga  
agctacctccttcgctgcgccctcacttccctatcttcagatggacagtgaaaccaagacatgaagaagtg  
caacagaacgaacttatccttatataagatgaattttctctctcttctacctatgatcagtagattgaag  
accaacaacatctcgagaaagaaggaaaagaagtagaatcaatcaacggcacctagatcatgaaacgggc  
atctctttcatctgccctaggatcccctctctcttcgattattcaagtgattgatagttacaggacaggg  
acatctcactccgccttgatctttcttttctacgatacgaacaaaagatctccttaaaaaatcgaaga

gcgtatagatcacattttaagtcgaagcagaggggaagaggggcaagcacgctaggcattccgattgggtgc  
ttagttcactccgcccgaaggaagacattttaactagacataatttgatctgttcttccctattcacta  
ggttatagggcaagaccctgatctattggatggggggcccttctacaataatgcttttacttaatgct  
gccaatctcaaaatcttgtagtccttgaatgtgatcttgatggttcgtctttcgaatgggtggtgtaac  
cataatgtgatgatagatttaaatacagttggcataaagataataggataagcctgattcttccctgtgg  
ggtaaatacaagaaagcagcagcaactattggatagaaagagttgagaagaaaactcaagcctggggat  
gttgataatagttctttctataaaaagagagagaactacctaatacacacacaatctaggccatgctat  
tccacatttgtccgcgacaagaagatcctgcatcgcagttgggggggtaagaagaattttactccga  
agttccccatccgaatagttgttcgcgagcaaatctgcgaccctcccgataatcctcacttgtccaatct  
ctagcaagtaattcctgaatccgctcactctttgattactctagtagccaactcatagaaagatgcaata  
gtcaagagccactaagaccataaccagtactgactggagcagtcgcctgagcataatcgtgactctta  
gcactttttgtctcaaatggtaactcaacttactagtacaagtaggtttctcattgtgggtttacgatgagc  
ttttcaattacaagtcgaaaaagacccccaaaagcgggtgaagggccgccttaattaaatgaggtaccgtg  
ccctccctttactctagtccttttttaactgccttggctggaagagattctattatgctcgggtcat  
tgggaccgggctagcaaaaggtgcgaatccttttacgccagaggccaggggaagcaatcaaacccatag  
caactaagggattctccaaaggattgatagaagctctgtttagaagaagtgatctataactatgaagt  
gaactctgattatcaagcgaactatgacttattttcttcgagaagaatctatgactttgaaactgccagc  
agaatctatgacttggaaatctatgactttgaaagatctatgactttgaaactgcctgatagaagattga  
gtagacctacttgacaggctctttctttacactacgctcttttgcatgacttttttctactatgtatt  
caaaaaaaaaatgggttcaaaagtaccataaaaataagtgagaaccactaggataaatagtaccataaaaataagt  
gagaaccactaggataatctatccaataatgagatctatcaagcccttcggaccttctgcttttcttct  
tattccgtttccagtggggaatcttcgagagtcctttcttgatggctattcatttctatctcattaagat  
gttcatgtgatagggaggcaagaatcctaacaattggctcttggtaaaaaatcattactatgaccgaatg  
acttgagtccgggttccgggttgtaaatgctatagaaagtggtctctggattttgatcctatgcaaatc  
attacgtggctcatatagagatggaaaaaaaaacctggacttggcttgggagcaaggggtcagtgatgat  
gatgccgtttggtcgaagcaacgctccaagtacgtttatgcaattaatgacgcaggtcttgcgccatgg  
tcggtttggtttgggtatcttttgatgagatattggctcttcgtaaaaatgccgttgaacatatggaacat  
cttcgccaattaatgatagtggtgcaacaagagaaactctatatcaatttgaagaagcctccgggggatc  
cttttttggttcttgagattttgcatttcagctgaaggagtcaaaggctgatccgggaaaggttagtgcc  
attgtggaatggccagctacctaccactagtaaggttcgtagtttccatagcttggccacattctacc  
gtcgttctattcgcaacttcagcaccacagcacctatcacagagtggttgaagatagtcatttcaactg  
gactctggctgcggaggagagtttccagttgagtgagaatagaacaacagccattttcagttgatccat  
tgtgatgtttgggggtccgtacagatattagatttcttacttccgttccgattaaatgggagatgggcaac  
ataggcaagatgggacttggcatcaggttcaggtcagggcatgaagctacagattatatttgcggctcgtg  
agac
